# Supplementary material for: Meteorological Drought in Northwestern Escarpment of Ethiopian Rift Valley: Detection Seasonal and Spatial Trends
Source: Research Square preprint supplement (doi:10.21203/rs.3.rs-125114/v1), 2020-12-11
Supplement: Supplementary file 1 [file bd4d0e5c4450d5b3f07818bf.xlsx]

## Sheet: Temperature Minimum
	Grid points	1	2	3	4	5	6	7	8	9	10	11	12	13	14	15	16	17	18	19	20	21	22	23	24	25	26	27	28	29	30	31	32	33	34	35	36	37	38	39	40	41	42	43	44	45	46	47	48
	Longitude	39.2062	39.2062	39.2062	39.2437	39.2437	39.2437	39.2437	39.2437	39.2437	39.2437	39.2437	39.2812	39.2812	39.2812	39.2812	39.2812	39.2812	39.2812	39.2812	39.2812	39.2812	39.2812	39.2812	39.3188	39.3188	39.3188	39.3188	39.3188	39.3188	39.3188	39.3188	39.3188	39.3188	39.3188	39.3188	39.3188	39.3188	39.3563	39.3563	39.3563	39.3563	39.3563	39.3563	39.3563	39.3563	39.3563	39.3563	39.3563
	Latitude	12.5813	12.6188	12.6562	12.3938	12.4313	12.4688	12.5062	12.5437	12.5813	12.6188	12.6562	12.3187	12.3562	12.3938	12.4313	12.4688	12.5062	12.5437	12.5813	12.6188	12.6562	12.7312	12.7688	12.3187	12.3562	12.3938	12.4313	12.4688	12.5062	12.5437	12.5813	12.6188	12.6562	12.6937	12.7312	12.7688	12.8063	12.3187	12.3562	12.3938	12.4313	12.4688	12.5062	12.5437	12.5813	12.6188	12.6562	12.6937
Years	Months
1983	3	14.567	13.133	13.367	14.567	14.367	14.3	14.033	13.7	13.633	12.1	13.067	15.4	14.233	13.9	13.233	12.1	11.3	11.9	12.067	13	11.5	12.133	11.3	14.533	14	11.4	11.767	10.467	10.933	11.133	11.3	11.6	10.1	11.833	10.167	11.5	12.7	13.5	13.667	11.467	11.467	10.467	9.8	10.6	11.433	10.667	9.9	11.2
1983	4	14.567	13.433	13.633	14.733	14.567	14.533	14.267	13.867	13.733	12.467	13.333	15.4	14.167	14.133	13.433	12.5	11.533	12.267	12.333	13.167	11.733	12.033	11.067	14.533	14.1	11.733	12.267	10.833	11.3	11.5	11.533	11.733	10.233	11.9	9.9	11.2	12.5	13.533	13.833	11.767	12.067	10.967	10.167	11	11.867	10.8	10.133	11.367
1983	5	14.467	13	13.2	14.467	14.3	14.233	14	13.667	13.567	11.9	12.9	14.867	13.633	13.833	13.133	12.1	11.2	11.9	12.033	12.967	11.233	11.7	10.767	14.033	13.5	11.3	11.8	10.4	10.9	11.1	11.3	11.5	9.767	11.5	9.633	11.033	12.333	12.967	13.2	11.067	11.533	10.467	9.733	10.6	11.5	10.6	9.6	10.967
1983	6	15.167	15.133	15.3	15.233	15.1	15.033	14.8	14.333	14.233	13.533	14.533	15.567	14.2	14.6	13.767	12.7	11.667	12.567	12.633	13.633	12.567	12.8	11.533	14.633	14.067	11.733	12.367	10.833	11.467	11.7	11.833	12.067	11	12.867	10.5	12	13.367	13.433	13.767	11.4	12.2	11	10.167	11.267	12.267	11.133	10.933	12.433
1983	7	15.267	15.333	15.333	15.667	15.533	15.533	15.3	14.767	14.533	13.633	14.5	15.9	14.6	15.267	14.467	14.133	12.867	13.7	13.6	14.4	12.933	12.6	11.067	15.2	14.733	13.233	14	12.3	12.9	13.067	12.967	12.9	11.4	13.033	10.3	11.533	12.767	14.133	14.733	13.1	14.067	12.767	11.7	12.767	13.733	12.1	11.533	12.7
1983	8	14.4	14.5	14.533	14.6	14.433	14.467	14.3	13.867	13.733	12.967	13.833	15.533	14.4	14.233	13.467	13.267	12.133	12.933	12.9	13.7	12.433	12.233	11.1	14.867	14.5	12.4	13.1	11.567	12.2	12.3	12.3	12.267	11	12.567	10.1	11.3	12.7	13.933	14.5	12.933	13.133	11.933	11.033	12	12.933	11.533	11.033	12.2
1984	3	12	11.633	12.067	11.933	11.767	11.7	11.467	11.1	11.033	10.5	11.5	11.933	10.7	11.267	10.533	9.533	8.633	9.333	9.5	10.433	9.667	10.5	9.367	11	10.467	8.733	9.2	7.8	8.3	8.5	8.667	8.933	8.133	10	8.167	9.8	10.867	9.933	10.167	8.267	8.833	7.8	7.1	7.933	8.833	7.967	7.9	9.333
1984	4	12.133	11.667	11.867	12.267	12.133	12.067	11.8	11.367	11.233	10.633	11.533	12.033	10.867	11.633	10.933	10.067	9.133	9.767	9.833	10.667	9.8	10.167	9.267	11.167	10.7	9.267	9.733	8.367	8.8	9	9.033	9.2	8.267	9.933	8.067	9.4	10.7	10.133	10.467	8.867	9.5	8.433	7.667	8.467	9.3	8.3	8.1	9.367
1984	5	13.733	13.367	13.567	13.8	13.633	13.6	13.333	12.967	12.867	12.333	13.233	14.333	13.133	13.167	12.467	11.467	10.567	11.267	11.367	12.267	11.467	11.933	11.1	13.5	12.967	10.667	11.167	9.833	10.267	10.467	10.633	10.833	10	11.7	9.9	11.3	12.633	12.467	12.7	10.367	10.933	9.867	9.133	9.967	10.833	9.933	9.8	11.2
1984	6	15.633	15.6	15.733	15.8	15.633	15.6	15.3	14.833	14.7	13.933	15	16.2	14.733	15.1	14.267	13.267	12.167	13.067	13.133	14.167	13.033	13.3	11.5	15.233	14.633	12.333	13	11.367	12	12.233	12.333	12.533	11.333	13.367	10.867	12.467	13.4	14.033	14.4	12.067	12.867	11.567	10.7	11.767	12.867	11.567	11.3	12.867
1984	7	14.833	14.9	14.933	15.233	15.067	15.1	14.833	14.333	14.1	13.233	14.1	15.833	14.567	14.8	13.967	13.7	12.433	13.267	13.2	14.033	12.567	12.267	10.933	15.1	14.667	12.767	13.6	11.8	12.467	12.6	12.567	12.5	10.967	12.667	9.9	11.167	12.667	14.1	14.7	12.933	13.633	12.3	11.3	12.367	13.3	11.667	11.067	12.3
1984	8	14.667	14.767	14.8	14.833	14.7	14.733	14.533	14.1	14	13.167	14.1	15.267	14.067	14.433	13.667	13.467	12.3	13.133	13.1	13.967	12.6	12.467	11.233	14.567	14.167	12.533	13.3	11.667	12.333	12.433	12.433	12.433	11.067	12.8	10.167	11.5	12.9	13.567	14.133	12.6	13.333	12.033	11.1	12.133	13.1	11.633	11.067	12.367
1985	3	12.733	12.4	12.7	12.733	12.567	12.467	12.267	11.9	11.767	11.3	12.267	13.567	12.4	12.033	11.333	10.333	9.433	10.133	10.233	11.2	10.4	11.067	10.233	12.7	12.167	9.533	9.967	8.6	9.067	9.267	9.467	9.7	8.9	10.733	9	10.433	11.733	11.633	11.833	9.733	9.6	8.6	7.9	8.767	9.6	8.733	8.667	10.1
1985	4	13.6	13.1	13.267	13.733	13.567	13.533	13.267	12.9	12.8	12.133	13.033	14.7	13.5	13.167	12.5	11.633	10.667	11.367	11.4	12.233	11.333	11.6	10.633	13.933	13.433	10.833	11.4	9.967	10.467	10.633	10.667	10.867	9.9	11.5	9.567	10.833	12.067	12.933	13.233	11.233	11.2	10.1	9.367	10.2	11.067	9.967	9.767	10.967
1985	5	13.4	13	13.233	13.433	13.267	13.2	13	12.633	12.567	11.967	12.967	13.933	12.7	12.8	12.133	11.2	10.267	11.033	11.133	12.067	11.2	11.6	10.667	13.133	12.6	10.4	10.9	9.533	10.033	10.233	10.367	10.6	9.733	11.467	9.533	10.933	12.2	12.1	12.367	10.333	10.7	9.633	8.867	9.733	10.667	9.7	9.533	10.933
1985	6	14.033	13.967	14.133	14.2	14.033	13.967	13.733	13.267	13.1	12.367	13.433	15	13.567	13.533	12.733	11.767	10.633	11.467	11.6	12.567	11.467	11.7	10.533	14.067	13.467	10.8	11.4	9.833	10.5	10.7	10.8	11	9.833	11.8	9.333	10.9	12.4	12.9	13.2	10.933	11.3	10.033	9.133	10.233	11.267	10.067	9.8	11.333
1985	7	14.767	14.833	14.833	15.067	14.933	14.933	14.733	14.267	14	13.2	14.033	15.767	14.5	14.667	13.933	13.6	12.4	13.2	13.133	13.9	12.533	12.233	11	15.033	14.633	12.7	13.5	11.8	12.4	12.533	12.5	12.433	11	12.6	9.967	11.167	12.667	14	14.6	12.567	13.533	12.233	11.233	12.3	13.233	11.667	11.1	12.267
1985	8	14.4	14.5	14.567	14.567	14.4	14.5	14.3	13.867	13.767	12.967	13.867	15.033	13.833	14.2	13.4	13.267	12.1	12.9	12.867	13.767	12.467	12.233	11.033	14.333	13.967	12.3	13.067	11.5	12.1	12.3	12.267	12.267	10.933	12.567	10.033	11.267	12.7	13.367	13.933	12.333	13.133	11.867	10.933	12	12.9	11.467	10.967	12.167
1986	3	13.267	12.933	13.167	13.2	13.067	12.967	12.733	12.4	12.333	11.867	12.8	13.4	12.233	12.533	11.833	10.833	9.967	10.667	10.833	11.767	10.967	11.667	10.867	12.533	12.033	10	10.5	9.1	9.633	9.833	10	10.3	9.533	11.367	9.567	11	12.333	11.5	11.733	9.6	10.167	9.167	8.5	9.267	10.2	9.333	9.3	10.7
1986	4	13.433	12.933	13.133	13.6	13.433	13.4	13.167	12.733	12.6	11.933	12.9	13.867	12.633	13	12.267	11.467	10.467	11.167	11.233	12.133	11.133	11.433	10.433	13.067	12.533	10.633	11.2	9.667	10.2	10.367	10.467	10.633	9.6	11.367	9.233	10.633	11.933	12.033	12.367	10.3	11	9.9	9.067	9.967	10.867	9.7	9.5	10.767
1986	5	14.467	14.1	14.3	14.467	14.3	14.267	14.033	13.633	13.6	12.967	13.933	14.767	13.5	13.867	13.1	12.133	11.167	11.933	12.033	13	12.1	12.6	11.7	13.9	13.367	11.3	11.8	10.367	10.867	11.1	11.233	11.533	10.6	12.4	10.467	11.867	13.267	12.867	13.1	10.9	11.533	10.467	9.667	10.6	11.533	10.533	10.433	11.833
1986	6	14.9	14.867	15.067	15	14.833	14.767	14.567	14.133	14	13.267	14.3	15.267	13.933	14.367	13.567	12.567	11.5	12.367	12.467	13.5	12.333	12.667	11.533	14.4	13.833	11.6	12.233	10.667	11.333	11.6	11.7	11.9	10.767	12.7	10.3	11.833	13.367	13.433	13.867	11.6	12.4	11.167	10.067	11.133	12.167	10.967	10.7	12.233
1986	7	13.733	13.833	13.833	14.067	13.933	13.933	13.733	13.267	13.067	12.2	13.033	14.367	13.1	13.7	12.9	12.633	11.4	12.233	12.167	12.967	11.567	11.233	9.967	13.667	13.3	11.733	12.5	10.8	11.467	11.567	11.5	11.467	10	11.667	8.933	10.167	11.633	12.867	13.467	11.8	12.8	11.5	10.267	11.333	12.267	10.7	10.1	11.267
1986	8	13.167	13.267	13.333	13.3	13.133	13.233	13.067	12.633	12.533	11.733	12.633	13.5	12.367	12.933	12.133	12	10.867	11.7	11.633	12.5	11.2	11.067	9.867	12.833	12.467	11.033	11.8	10.2	10.867	11.033	11.033	11.033	9.7	11.367	8.833	10.067	11.467	12.2	12.733	11.2	12.167	10.967	9.7	10.767	11.7	10.233	9.733	10.967
1987	3	11.733	11.333	11.633	11.967	11.8	11.4	11.2	10.833	10.833	10.333	11.267	12.867	11.7	11.3	10.333	9.233	8.4	9.1	9.267	10.167	9.467	10.1	9.267	12.033	11.467	8.8	8.867	7.6	8.067	8.267	8.467	8.767	8	9.767	8.1	9.467	10.667	10.833	10.967	8.833	8.633	7.567	6.933	7.733	8.6	7.8	7.767	9.133
1987	4	13.033	12.5	12.667	13.333	13.233	12.9	12.667	12.233	12.167	11.467	12.433	13.533	12.3	12.733	11.733	10.9	9.867	10.667	10.733	11.633	10.6	10.9	9.833	12.7	12.233	10.3	10.6	9.067	9.667	9.867	10	10.133	9.1	10.867	8.667	10.033	11.433	11.767	12.167	10.133	10.433	9.333	8.5	9.433	10.4	9.2	8.933	10.3
1987	5	12.533	12.167	12.4	12.633	12.467	12.333	12.1	11.767	11.667	11.067	12.033	12.9	11.7	11.967	11.233	10.267	9.333	10.067	10.2	11.1	10.233	10.767	9.833	12.1	11.533	9.533	9.967	8.6	9.133	9.3	9.433	9.667	8.8	10.533	8.633	10.067	11.4	11.3	11.567	9.467	9.733	8.667	7.9	8.8	9.667	8.767	8.633	10
1987	6	14.333	14.267	14.467	14.5	14.333	14.233	13.967	13.533	13.367	12.667	13.7	14.833	13.467	13.9	12.967	11.933	10.867	11.733	11.833	12.833	11.733	11.967	10.867	13.933	13.4	11.067	11.633	10.033	10.7	10.933	11.067	11.267	10.133	12.033	9.667	11.2	12.733	12.967	13.367	11	11.467	10.267	9.4	10.5	11.533	10.333	10.1	11.633
1987	7	14.933	15.033	15	15.467	15.333	15.233	15.033	14.5	14.267	13.333	14.167	15.833	14.567	15.133	14.233	13.933	12.667	13.433	13.333	14.133	12.667	12.267	10.967	15.133	14.733	13.133	13.8	12.067	12.7	12.833	12.733	12.7	11.167	12.733	10	11.167	12.633	14.167	14.767	13.033	13.933	12.6	11.6	12.633	13.567	11.933	11.3	12.433
1987	8	14.233	14.333	14.4	14.567	14.433	14.3	14.1	13.667	13.567	12.8	13.633	14.8	13.633	14.167	13.233	13.067	11.867	12.733	12.667	13.567	12.233	12.067	10.833	14.133	13.7	12.267	12.867	11.233	11.9	12.067	12.067	12.067	10.7	12.333	9.767	11.033	12.467	12.667	13.2	11.633	12.9	11.667	10.7	11.767	12.733	11.267	10.733	11.967
1988	3	13.9	13.533	13.8	14.067	13.867	13.767	13.533	12.9	12.8	12.267	13.433	14.333	13.1	13.367	12.633	11.567	10.7	11.067	11.233	12.133	11.4	12.133	11.367	13.433	12.9	10.8	11.2	9.8	10	10.2	10.4	10.667	9.9	11.767	10.033	11.5	12.8	12.367	12.533	10.3	10.833	9.833	8.8	9.633	10.533	9.7	9.667	11.1
1988	4	15.033	14.533	14.7	15.4	15.2	15.033	14.767	14.333	14.133	13.467	14.333	15.7	14.467	14.767	14	12.967	11.933	12.633	12.633	13.5	12.533	12.9	11.967	14.833	14.3	12.267	12.733	11.133	11.633	11.733	11.833	12	11.033	12.7	10.667	12.033	13.467	13.7	13.933	11.7	12.367	11.233	10.467	11.333	12.133	11.067	10.833	12.133
1988	5	14.867	14.467	14.7	15.267	15.1	15.033	14.8	13.867	13.8	13.2	14.3	15.533	14.267	14.567	13.867	12.833	11.867	12.133	12.233	13.133	12.3	12.867	11.967	14.6	14.1	11.967	12.467	11.033	11.067	11.267	11.433	11.633	10.767	12.6	10.633	12.133	13.6	13.567	13.833	11.567	12.167	11.1	9.833	10.7	11.667	10.7	10.567	12
1988	6	14.933	14.933	15.033	15.333	15.167	14.9	14.6	14.133	14	13.233	14.3	15.733	14.3	14.667	13.633	12.6	11.467	12.3	12.4	13.467	12.267	12.533	11.367	14.767	14.2	11.833	12.3	10.633	11.267	11.533	11.633	11.833	10.633	12.6	10.1	11.7	13.267	13.467	13.867	11.5	12.2	10.867	10	11.067	12.133	10.867	10.6	12.167
1988	7	14.3	14.4	14.4	14.833	14.667	14.267	14	13.2	12.967	12.1	13.567	15.167	13.933	14.467	13.233	12.933	11.7	12.133	12.067	12.833	11.433	11.067	9.833	14.5	14.067	12.467	12.833	11.167	11.4	11.5	11.4	11.4	9.933	11.467	8.8	10.033	11.467	13.5	14.067	12.367	12.967	11.633	10.267	11.3	12.2	10.633	10.033	11.167
1988	8	14.167	14.3	14.333	14.467	14.3	14.367	14.167	13.5	13.333	12.6	13.633	14.7	13.567	14.067	13.367	13.167	12.067	12.533	12.5	13.3	12.067	11.9	10.767	14.033	13.667	12.3	12.967	11.467	11.8	11.933	11.933	11.9	10.6	12.167	9.767	10.967	12.3	13.133	13.633	12.167	13.033	11.867	10.7	11.7	12.533	11.133	10.7	11.8
1989	3	13.333	13.1	13.367	13.3	13.1	13.067	12.833	12.5	12.467	11.967	12.9	13.533	12.4	12.633	11.933	10.933	10.033	10.767	10.933	11.967	11.233	11.9	11.067	12.7	12.167	10.267	10.667	9.367	9.867	10.067	10.267	10.567	9.8	11.6	9.833	11.233	12.467	11.767	11.967	9.833	10.333	9.367	8.733	9.5	10.4	9.6	9.567	10.933
1989	4	13.9	13.633	13.8	13.967	13.833	13.8	13.567	13.167	13.033	12.4	13.267	14.233	13.033	13.367	12.7	11.867	10.9	11.6	11.667	12.733	11.767	12.033	11.1	13.433	12.967	11.267	11.833	10.367	10.9	11.067	11.133	11.267	10.3	11.967	9.9	11.267	12.567	12.6	12.933	10.967	11.633	10.533	9.733	10.6	11.467	10.367	10.133	11.4
1989	5	13.5	13.1	13.367	13.667	13.533	13.467	13.2	12.8	12.667	12.067	12.933	13.867	12.667	12.967	12.267	11.3	10.367	11.033	11.167	12.1	11.2	11.767	10.9	12.967	12.467	10.433	10.967	9.467	10	10.2	10.367	10.6	9.667	11.467	9.533	11.067	12.5	11.9	12.2	10	10.633	9.567	8.8	9.667	10.567	9.633	9.467	10.933
1989	6	14.167	14.133	14.3	14.233	14.067	14.067	13.767	13.367	13.233	12.5	13.567	14.567	13.2	13.6	12.8	11.833	10.733	11.6	11.7	12.667	11.567	11.833	10.8	13.6	13.1	10.833	11.5	9.9	10.533	10.8	10.9	11.067	9.933	11.9	9.5	11.067	12.633	12.433	12.8	10.567	11.367	10.133	9.233	10.3	11.367	10.133	9.9	11.4
1989	7	14.933	15.033	15	14.933	14.833	14.833	14.633	14.133	13.933	13.1	14.2	15.267	13.967	14.533	13.767	13.5	12.3	13.1	13	13.833	12.4	12.1	10.867	14.533	14.133	12.567	13.367	11.7	12.333	12.5	12.4	12.367	10.9	12.5	9.833	11.1	12.567	13.467	14.1	12.5	13.467	12.167	11.133	12.2	13.167	11.567	11	12.2
1989	8	14.1	14.167	14.233	14.2	14.067	14.1	13.967	13.533	13.433	12.667	13.533	14.767	13.6	13.8	13.067	12.933	11.767	12.6	12.6	13.4	12.133	12	10.833	14.067	13.667	12.267	13.033	11.467	11.8	12	11.933	11.967	10.667	12.267	9.8	11.033	12.4	13.1	13.667	12.167	13.033	11.867	10.967	11.967	12.6	11.167	10.7	11.867
1990	3	13.367	12.833	13.067	13.633	13.433	13.333	13.133	12.5	12.433	11.9	12.8	14.1	12.933	12.9	12.2	11.167	10.3	11	11.167	11.8	11.067	11.567	10.733	13.767	12.733	10.667	10.833	9.467	9.933	10.167	10.333	10.6	9.9	11.333	9.633	10.933	12.133	12.7	12.867	10.7	10.733	9.7	8.8	9.6	10.467	9.667	9.633	11.033
1990	4	12.633	11.9	12.033	12.867	12.7	12.6	12.3	11.867	11.667	11	11.767	13.967	12.733	12.233	11.5	10.567	9.5	10.167	10.233	11.067	10.1	10.233	9.3	13.133	12.567	10.6	10.3	8.667	9.167	9.367	9.433	9.567	8.567	10.3	8.233	9.367	10.833	12.033	12.333	10.133	10.8	9.667	7.967	8.867	9.767	8.633	8.367	9.7
1990	5	14.333	13.867	14.133	14.4	14.167	14.067	13.1	13.4	13.3	12.7	13.733	14.6	13.333	13.667	12.833	11.767	10.733	11.567	11.667	12.667	11.767	12.333	11.433	13.667	13.133	10.967	11.467	9.867	10.4	10.633	10.833	11.033	10.133	12.067	10.033	11.567	13.133	12.533	12.833	10.5	11.167	9.933	9.133	10.1	11.1	11.067	9.933	11.467
1990	6	14.567	14.5	14.667	14.333	14.233	14.2	13.267	13.667	13.567	12.767	13.9	14.667	13.133	13.633	12.867	11.867	10.7	11.867	11.967	13.1	11.833	12.167	10.933	13.7	13.067	10.733	11.5	9.867	10.6	10.833	10.933	11.333	10.1	12.2	9.6	11.233	12.9	12.4	12.833	10.5	11.4	10.133	9.167	10.333	11.5	11.133	10.033	11.7
1990	7	13.9	14	14	13.9	13.933	13.933	12.933	13.467	13.233	12.333	13.2	14.267	12.967	13.533	12.833	12.5	11.267	12.367	12.267	13.067	11.633	11.3	10.033	13.533	13.133	11.5	12.233	10.7	11.333	11.5	11.4	11.633	10.1	11.733	9	10.267	11.767	12.533	13.1	11.4	12.333	11.2	10.167	11.2	12.167	11.567	10.233	11.4
1990	8	13.167	13.267	13.3	12.367	12.533	12.633	12.2	12.667	12.5	11.7	12.633	12.7	11.4	12	11.533	11.333	10.167	12.067	11.667	12.5	11.167	10.967	9.7	12	11.6	10.1	10.867	9.567	10.2	11.033	11.033	11.4	9.633	11.333	8.733	10.033	11.367	11	11.533	9.967	10.9	9.967	9.033	10.733	11.7	10.933	10.1	11.333
1991	3	14	13.633	13.933	14.933	13.6	13.533	13.5	13.133	13.067	12.567	13.533	15.167	14	14.233	12.433	11.3	10.467	11.167	11.5	12.4	11.7	12.4	11.633	14.3	13.767	11.633	12.067	9.633	10.1	10.3	10.5	10.8	10.3	12.033	10.4	11.8	13.033	13.267	13.433	11.2	11.667	9.6	8.933	9.767	10.633	9.867	9.8	11.2
1991	4	13.333	12.833	13.033	14.567	13.167	13.067	13.033	12.6	12.433	11.833	12.7	14.867	13.667	13.967	12.033	11.033	10.067	10.733	11.033	11.867	10.9	11.267	10.367	14.033	13.533	11.533	12.033	9.333	9.833	9.933	10.033	10.133	9.433	11.1	9.2	10.5	11.9	12.967	13.267	11.2	11.833	9.5	8.7	9.5	10.333	9.233	9	10.333
1991	5	13.767	13.3	13.567	13.833	13.7	13.6	13.267	12.9	12.833	12.233	13.167	14.067	12.9	13.2	12.5	11.4	10.5	11.133	11.233	12.167	11.3	11.933	11.067	13.2	12.7	10.6	11.1	9.767	10.267	10.4	10.433	10.733	9.867	11.633	9.833	11.267	12.633	12.167	12.433	10.267	10.833	9.8	9.067	9.9	10.667	9.8	9.7	11.1
1991	6	14.7	14.667	14.8	14.9	14.733	14.667	14.3	13.767	13.667	12.933	13.933	15.267	13.9	14.3	13.5	12.4	11.333	12.033	12.1	13.067	12.033	12.3	11.067	14.533	13.8	11.533	12.133	10.6	11.2	11.333	11.267	11.467	10.4	12.233	9.967	11.433	12.833	13.3	13.633	11.233	11.9	10.733	9.867	10.833	11.733	10.567	10.367	11.8
1991	7	15.6	15.7	15.7	15.967	15.833	15.833	15.6	15.1	14.9	14.067	14.867	16.267	15.033	15.6	14.8	14.5	13.267	14.067	13.967	14.767	13.333	13.033	11.867	15.667	15.167	13.6	14.367	12.667	13.367	13.167	13.067	13.067	11.567	13.167	10.533	11.733	13.533	13.9	14.467	12.8	14.167	12.9	11.9	12.933	13.867	12.267	11.7	12.867
1991	8	14.333	14.467	14.467	14.533	14.367	14.433	14.233	13.833	13.667	12.967	13.767	14.767	13.633	14.133	13.433	13.2	12.1	12.867	12.833	13.633	12.4	12.233	11	14.133	13.733	12.333	13.033	11.567	12.167	11	10.967	10.967	9.667	11.267	8.833	10	12.567	11.867	12.433	10.9	11.767	10.633	9.733	10.7	11.567	10.2	9.733	10.867
1992	3	14.067	13.7	13.967	14.267	14.1	14	13.767	13.267	13.133	12.633	13.567	14.633	13.467	13.6	12.933	11.9	11.067	11.467	11.567	12.233	11.533	12.3	11.567	13.767	13.233	11.2	11.633	10.267	10.633	10.367	10.567	10.9	10.2	11.933	10.3	11.7	12.967	12.767	12.9	10.733	11.233	10.233	9.533	9.9	10.7	9.967	9.933	11.333
1992	4	15.333	14.8	15	16.267	16.133	16.033	15.767	15.167	14.433	13.8	14.667	16.467	15.333	15.667	14.967	14.067	13.1	13.567	13.033	13.8	12.833	13.2	12.333	15.633	15.167	12.867	13.433	11.967	12.433	12.333	12.233	12.367	11.4	13.067	11.067	12.433	13.767	14.2	14.533	12.5	13.167	12.1	11.267	11.867	12.533	11.433	11.233	12.467
1992	5	15.3	14.9	15.167	16	15.867	15.767	15.5	15.167	14.4	13.8	14.767	16.167	14.967	15.333	14.633	13.633	12.7	13.367	12.833	13.733	12.9	13.467	12.633	15.3	14.767	12.5	13	11.6	12.1	12.3	12.067	12.267	11.4	13.2	11.333	12.767	14.2	13.933	14.233	12.1	12.733	11.667	10.9	11.767	12.267	11.367	11.233	12.633
1992	6	15.433	15.367	15.533	15.867	15.7	15.633	15.367	14.933	14.433	13.633	14.767	16.167	14.733	15.167	14.333	13.333	12.167	13.1	12.833	13.9	12.7	13	11.9	15.2	14.6	12.2	12.933	11.267	11.9	12.133	11.967	12.2	10.967	13.033	10.533	12.167	13.8	13.867	14.267	11.933	12.8	11.5	10.567	11.633	12.467	11.2	10.933	12.533
1992	7	14.933	15.033	15.033	15.433	15.333	15.333	15.133	14.6	14.2	13.3	14.233	15.767	14.467	15.033	14.233	13.967	12.667	13.533	13.267	14.133	12.667	12.367	11.067	15	14.633	13.267	14.033	12.3	13	13.1	12.6	12.567	11.033	12.767	10	11.3	12.767	14.233	14.867	13.133	14.167	12.8	11.733	12.8	13.367	11.733	11.133	12.367
1992	8	14.467	14.567	14.667	14.8	14.667	14.7	14.5	14.1	13.833	13.067	13.933	15.033	13.933	14.4	13.7	13.5	12.433	13.2	13.033	13.8	12.567	12.4	11.3	14.367	14.033	12.633	13.3	11.833	12.433	12.567	12.433	12.433	11.133	12.7	10.3	11.467	12.833	13.433	13.967	12.467	13.367	12.167	11.333	12.267	13.067	11.667	11.2	12.333
1993	3	12.933	12.6	12.833	12.7	12.533	12.467	12.233	11.9	11.967	11.433	12.433	12.867	11.7	12	11.267	10.367	9.467	10.167	10.5	11.4	10.633	11.3	10.467	12	11.467	9.933	10.4	9	9.5	9.7	9.667	9.933	9.133	10.933	9.133	10.6	11.933	11.3	11.567	9.467	10.067	9.067	8.333	9.133	9.833	8.967	8.9	10.333
1993	4	14.233	13.8	13.967	14.533	14.4	14.333	14.1	13.567	13.467	12.767	13.667	14.833	13.6	13.967	13.267	12.4	11.433	12.033	12.067	12.933	11.967	12.267	11.267	14	13.5	11.6	12.167	10.7	11.2	11.4	11.367	11.5	10.467	12.167	10.133	11.467	12.767	13	13.333	11.3	11.967	10.867	10.067	10.9	11.667	10.6	10.367	11.633
1993	5	14.4	14.033	14.233	14.2	14.067	14.033	13.8	13.4	13.533	12.933	13.933	14.433	13.2	13.567	12.867	11.933	11	11.767	12.033	12.967	12.1	12.567	11.667	13.6	13.1	11.633	12.133	10.7	11.233	11.433	11.233	11.533	10.6	12.4	10.467	11.867	13.267	13.033	13.3	11.233	11.867	10.8	10.1	10.9	11.567	10.567	10.433	11.8
1993	6	14.667	14.6	14.8	14.667	14.5	14.467	14.2	13.7	13.733	12.967	14.067	15	13.567	14	13.2	12.233	11.133	11.967	12.167	13.233	12.1	12.367	11.233	14.067	13.467	11.633	12.333	10.7	11.333	11.567	11.433	11.633	10.467	12.4	10	11.533	13.067	13.267	13.667	11.433	12.2	10.933	10.067	11.1	11.933	10.667	10.4	11.933
1993	7	14.8	14.9	14.933	15.233	15.133	15.133	14.9	14.4	14.1	13.167	14.133	15.5	14.2	14.8	14	13.767	12.467	13.333	13.133	14	12.533	12.233	10.933	14.767	14.333	12.6	13.4	11.633	12.333	12.467	12.5	12.433	10.967	12.633	9.833	11.167	12.667	13.5	14.167	12.433	13.5	12.133	11.067	12.2	13.267	11.6	11.033	12.267
1993	8	14.467	14.567	14.633	14.567	14.433	14.5	14.3	13.9	13.733	12.967	13.9	14.833	13.6	14.167	13.367	13.2	12	12.867	12.867	13.767	12.433	12.267	10.933	14.133	13.7	11.933	12.733	11.1	11.767	11.933	12.2	12.233	10.8	12.533	9.933	11.233	12.667	12.8	13.367	11.867	12.833	11.533	10.533	11.633	12.933	11.367	10.867	12.133
1994	3	13.867	13.533	13.8	13.9	13.767	13.667	13.4	13.033	12.933	12.467	13.4	14.1	13	13.267	12.533	11.467	10.667	11.267	11.4	12.333	11.667	12.233	11.5	13.3	12.767	10.8	11.133	9.9	10.3	10.5	10.667	10.933	10.267	11.967	10.3	11.633	12.733	12.4	12.467	10.3	10.8	9.867	9.2	9.967	10.767	10.067	10.033	11.4
1994	4	15.267	14.733	14.933	15.567	15.467	15.4	15.1	14.5	14.333	13.7	14.6	15.8	14.6	14.967	14.267	13.333	12.333	12.867	12.9	14.067	13.067	12.933	12	14.967	14.467	12.533	13.1	11.567	12.033	12.333	12.433	12.6	11.567	13.267	10.767	12.133	13.5	13.867	14.267	12.133	12.833	11.7	10.9	11.9	12.767	11.633	11.4	12.7
1994	5	15.5	15.067	15.3	15.567	15.4	15.4	15.133	14.667	14.567	14	14.967	15.733	14.533	14.9	14.233	13.2	12.3	12.867	13.033	14.167	13.333	13.333	12.433	14.867	14.333	12.333	12.833	11.5	12	12.333	12.467	12.733	11.833	13.633	11.233	12.667	14	13.8	14.067	12.067	12.633	11.567	10.833	11.833	12.767	11.8	11.667	13.067
1994	6	15.967	15.9	16.1	16.233	16.067	16.033	15.767	15.167	15.067	14.3	15.4	16.6	15.167	15.6	14.733	13.8	12.667	13.433	13.5	14.567	13.433	13.033	11.867	15.7	15.1	12.8	13.5	11.933	12.533	12.667	12.767	12.933	11.767	13.733	10.667	12.2	13.733	14.433	14.833	12.633	13.433	12.133	11.267	12.167	13.267	12	11.733	13.3
1994	7	14.867	14.933	14.933	15.2	15.067	15.067	14.833	14.3	14.133	13.267	14.133	15.533	14.233	14.8	14	13.7	12.467	13.267	13.233	14.033	12.633	12.333	11.1	14.767	14.367	12.833	13.567	11.9	12.533	12.633	12.6	12.567	11.067	12.733	10.033	11.267	12.767	13.833	14.367	12.7	13.667	12.367	11.333	12.367	13.367	11.767	11.167	12.367
1994	8	14.333	14.467	14.467	14.533	14.433	14.433	14.267	13.867	13.7	12.933	13.767	14.8	13.667	14.167	13.467	13.267	12.2	12.967	12.867	13.667	12.4	12.267	11.133	14.1	13.733	12.4	13.133	11.633	12.233	12.4	12.3	12.267	11.033	12.533	10.167	11.333	12.667	13.233	13.733	12.267	13.167	12	11.167	12.1	12.9	11.5	11.033	12.167
1995	3	14.2	13.833	14.133	13.967	13.767	13.7	13.5	13.133	13.3	12.8	13.767	14.167	13.067	13.3	12.633	11.533	10.7	11.4	11.733	12.633	11.967	12.633	11.867	13.333	12.833	11.033	11.433	10.133	10.567	10.8	10.967	11.267	10.567	12.267	10.667	12.067	13.267	12.567	12.733	10.567	11.033	10.133	9.467	10.267	11.1	10.333	10.3	11.7
1995	4	15.267	14.733	14.933	15.4	15.233	15.167	14.867	14.467	14.367	13.733	14.633	15.633	14.5	14.8	14.067	13.133	12.133	12.8	12.967	13.8	12.867	13.233	12.267	14.833	14.333	12.133	12.633	11.133	11.667	11.8	12.2	12.367	11.4	13.067	11.067	12.4	13.733	13.533	13.867	11.7	12.4	11.267	10.467	11.367	12.533	11.467	11.233	12.5
1995	5	14.867	14.467	14.667	14.8	14.667	14.6	14.367	13.867	13.933	13.367	14.333	15.033	13.767	14.133	13.433	12.433	11.467	12.133	12.367	13.333	12.433	13	12.1	14.167	13.633	11.633	12.167	10.767	11.233	11.467	11.567	11.833	10.933	12.767	10.8	12.3	13.733	13.1	13.4	11.267	11.9	10.833	10.033	10.933	11.867	10.9	10.733	12.2
1995	6	15	14.967	15.1	15.4	15.2	15.167	14.9	14.167	14.067	13.333	14.367	15.733	14.367	14.767	13.933	12.9	11.8	12.4	12.467	13.467	12.367	12.633	11.6	14.8	14.2	11.967	12.567	11.033	11.633	11.833	11.7	11.9	10.767	12.667	10.333	11.867	13.433	13.6	14	11.667	12.433	11.233	10.367	11.4	12.167	10.967	10.7	12.2
1995	7	14.533	14.7	14.7	14.9	14.767	14.8	14.567	14.133	13.9	13.033	13.933	15.2	13.933	14.5	13.7	13.4	12.133	13.067	12.933	13.7	12.267	11.967	10.667	14.467	14.067	12.433	13.2	11.5	12.2	12.3	12.233	12.2	10.7	12.367	9.667	10.9	12.367	13.4	14	12.333	13.333	12	10.967	12.067	13.033	11.4	10.8	12
1995	8	14.567	15.1	15.133	14.667	14.5	14.567	14.4	14.067	13.933	13.567	14.4	14.933	13.733	14.267	13.533	13.333	12.167	13.1	13.1	13.833	12.667	12.533	11.367	14.233	13.867	12.4	13.133	11.6	12.2	12.433	12.4	12.4	11.2	12.833	10.333	11.567	13	13.3	13.767	12.3	13.2	12	11.067	12.133	13.033	11.6	11.2	12.433
1996	3	14.5	14.2	14.467	14.733	14.533	14.433	14.2	13.7	13.6	13.133	14.067	14.933	13.833	14.033	13.367	12.3	11.433	11.9	12.033	12.933	12.267	12.933	12.233	14.1	13.6	11.533	11.9	10.6	11.067	11.267	11.267	11.533	10.9	12.6	10.967	12.367	13.6	13.067	13.233	11.067	11.533	10.567	10	10.733	11.367	10.667	10.6	11.967
1996	4	14.8	14.267	14.467	14.967	14.867	14.767	14.5	14.067	13.867	13.233	14.133	15.167	14	14.367	13.667	12.767	11.767	12.433	12.433	13.3	12.333	12.733	12.033	14.333	13.9	11.933	12.467	10.967	11.467	11.6	11.7	11.833	10.833	12.533	10.567	12.1	13.5	13.3	13.6	11.533	12.233	11.1	10.3	11.167	12	10.933	10.667	11.967
1996	5	14.033	13.667	13.867	14.033	13.9	13.833	13.6	13.2	13.2	12.6	13.533	14.267	13.067	13.4	12.7	11.767	10.867	11.567	11.7	12.567	11.767	12.3	11.4	13.433	12.933	10.933	11.433	10.133	10.6	10.8	10.933	11.167	10.3	12.067	10.233	11.6	12.967	12.4	12.7	10.633	11.2	10.2	9.433	10.3	11.133	10.267	10.167	11.533
1996	6	14.2	14.167	14.333	14.567	14.367	14.333	14.133	13.433	13.333	12.633	13.633	14.867	13.5	13.933	13.1	12.167	11.067	11.733	11.833	12.8	11.7	11.967	11.033	13.967	13.4	11.233	11.867	10.367	10.967	11.167	11.033	11.233	10.133	12.033	9.7	11.367	12.8	12.8	13.167	11	11.767	10.533	9.7	10.767	11.567	10.333	10.067	11.6
1996	7	14.233	14.3	14.3	14.567	14.467	14.467	14.2	13.767	13.533	12.667	13.533	14.933	13.6	14.2	13.4	13.1	11.867	12.7	12.6	13.433	12	11.7	10.5	14.2	13.8	12.167	12.967	11.3	11.967	12.067	12	11.967	10.433	12.1	9.433	10.767	12.167	13.167	13.767	12.133	13.1	11.767	10.733	11.8	12.733	11.133	10.567	11.767
1996	8	14.3	14.433	14.467	14.467	14.333	14.4	14.2	13.8	13.7	12.967	13.767	14.733	13.633	14.1	13.367	13.167	12.1	12.9	12.867	13.633	12.4	12.2	10.967	14.067	13.7	12.333	13.033	11.6	12.167	12.3	12.267	12.267	11	12.533	10.1	11.233	12.533	13.167	13.667	12.233	13.1	11.967	11.067	12.033	12.933	11.5	11.033	12.2
1997	3	14.4	14.067	14.3	14.133	13.933	13.8	13.9	13.533	13.467	13	13.9	14.367	13.2	13.4	12.733	12.233	11.367	12	12.133	13.067	12.333	13.033	12.3	13.8	13	10.933	11.867	10.567	11	11.2	11.4	11.633	10.967	12.7	11.033	12.433	13.8	12.767	12.967	11.033	11.533	10.567	9.867	10.667	11.5	10.733	10.7	12.067
1997	4	14.433	13.933	14.1	14.033	13.9	13.833	14.1	13.7	13.567	12.933	13.8	14.267	13.167	13.433	12.767	12.467	11.5	12.133	12.233	13	12.1	12.433	11.533	14.1	13	11.133	12.233	10.767	11.267	11.4	11.467	11.6	10.667	12.3	10.4	11.667	13.1	13.067	13.433	11.367	12	10.933	10.167	10.933	11.8	10.7	10.467	11.767
1997	5	14.9	14.633	14.833	14.467	14.233	14.133	14.5	14.1	14.033	13.5	14.4	14.7	13.567	13.767	13.1	12.933	12.033	12.733	12.833	13.7	12.9	13.4	12.6	14.6	13.333	11.333	12.633	11.333	11.8	11.967	12.067	12.3	11.5	13.167	11.433	12.767	13.933	13.6	13.867	11.9	12.4	11.4	10.667	11.5	12.333	11.433	11.3	12.633
1997	6	16.167	16.367	16.567	15.967	15.533	15.5	15.833	15.367	15.267	14.533	15.567	16.267	14.867	15.1	14.233	14.067	12.967	13.867	13.933	14.933	13.833	14.1	13	15.9	14.567	12.3	13.733	12.167	12.8	13.067	13.167	13.367	12.233	14.167	11.767	13.3	15	14.7	15.1	12.833	13.633	12.433	11.533	12.567	13.633	12.433	12.167	13.733
1997	7	14.933	15.067	15.033	15.033	14.867	14.867	14.933	14.433	14.2	13.333	14.2	15.4	14.133	14.633	13.867	13.933	12.667	13.467	13.333	14.133	12.733	12.433	11.2	15.033	14.267	12.7	13.8	12.133	12.733	12.833	12.733	12.667	11.233	12.833	10.2	11.433	12.933	14	14.6	12.967	13.9	12.533	11.533	12.533	13.467	11.933	11.333	12.467
1997	8	15.267	15.3	15.367	15	14.767	14.8	15.167	14.733	14.567	13.8	14.7	15.333	14.067	14.467	13.7	14	12.833	13.667	13.633	14.5	13.167	13.033	11.733	15.1	14.067	12.6	13.833	12.233	12.867	13.033	13	13.033	11.633	13.3	10.733	12.033	13.433	14.133	14.667	12.967	13.9	12.633	11.667	12.7	13.667	12.167	11.7	12.933
1998	3	14.433	14.067	14.367	14.7	14.8	14.667	14.433	14.1	14.033	13.567	13.967	14.933	13.8	14.233	13.567	12.467	11.633	12.3	12.433	13.333	12.667	13.4	12.767	14.3	13.767	11.7	12.1	10.833	11.3	11.467	11.7	11.967	11.267	13	11.4	12.9	14.167	13.3	13.467	11.267	11.8	10.867	10.2	11	11.833	11.067	11.033	12.367
1998	4	15	14.5	14.7	15.333	15.633	15.533	15.233	14.767	14.6	13.933	14.367	15.567	14.4	15.133	14.4	13.433	12.4	13.1	13.1	13.967	13	13.4	12.633	15.133	14.633	12.667	13.167	11.567	12.067	12.267	12.3	12.5	11.467	13.2	11.167	12.733	14.167	14.033	14.4	12.2	12.867	11.733	10.9	11.767	12.633	11.533	11.3	12.6
1998	5	14.967	14.567	14.833	15	15.3	15.2	14.967	14.533	14.467	13.867	14.4	15.2	13.967	14.767	14	13	12.033	12.767	12.9	13.8	12.933	13.5	12.767	14.8	14.267	12.133	12.667	11.267	11.733	11.933	12.067	12.3	11.433	13.233	11.267	12.933	14.4	13.667	13.967	11.767	12.433	11.333	10.567	11.433	12.333	11.333	11.233	12.633
1998	6	16.267	16.267	16.4	16.433	16.333	16.267	16	15.567	15.467	14.667	15.6	16.7	15.3	15.767	14.967	13.867	12.7	13.667	13.767	14.767	13.633	13.967	12.967	15.767	15.2	12.8	13.5	11.867	12.533	12.767	12.933	13.133	11.933	13.967	11.467	13.3	14.933	14.533	14.967	12.533	13.367	12.1	11.233	12.3	13.433	12.2	11.9	13.5
1998	7	14.7	14.767	14.767	14.9	14.8	14.833	14.567	14.067	13.967	13.033	13.967	15.267	13.9	14.467	13.633	13.367	12.1	12.967	13	13.833	12.367	12.1	10.767	14.5	14.067	12.333	13.133	11.4	12.067	12.167	12.3	12.267	10.733	12.467	9.667	11	12.567	13.3	13.967	12.233	13.267	11.867	10.767	11.933	13.1	11.4	10.833	12.1
1998	8	14.2	14.367	14.367	14.4	14.233	14.333	14.133	13.733	13.567	12.8	13.667	14.633	13.533	14.033	13.3	13.067	11.967	12.767	12.733	13.533	12.267	12.1	11.133	13.933	13.633	12.2	12.867	11.367	11.967	12.167	12.133	12.133	10.833	12.4	10	11.233	12.7	13.033	13.567	12.067	12.933	11.767	10.867	11.867	12.767	11.367	10.9	12.033
1999	3	12.3	12	12.267	12.633	12.467	12.333	12.1	11.767	11.7	11.233	11.867	12.867	11.767	11.967	11.333	10.2	9.433	10.033	10.133	11	10.367	9.5	10.433	10.5	10	9.533	9.867	8.6	9.033	7.633	7.8	8.1	7.467	9.1	7.633	10.567	11.767	9.533	9.667	7.467	7.9	6.967	6.367	7.1	7.9	7.2	7.233	8.533
1999	4	13.633	13.167	13.333	14	13.633	13.533	13.3	12.867	12.7	12.067	13.033	14.167	13.033	13.167	12.467	11.567	10.567	11.267	11.267	12.1	11.2	9.4	10.833	11.1	10.633	10.767	11.3	9.867	10.367	8.3	8.333	8.467	7.467	9.167	7.233	10.933	12.3	10.067	10.4	8.233	8.867	7.8	7	7.8	8.633	7.6	7.367	8.6
1999	5	15.233	14.833	15.067	15.133	15.033	14.933	14.733	14.367	14.3	13.667	14.7	13.4	14.167	14.467	13.767	12.7	11.8	12.567	12.667	13.7	12.8	11.3	12.433	12.5	11.967	11.867	12.367	10.967	11.533	9.7	9.9	10.1	9.2	11.1	9.1	12.667	14.033	11.4	11.7	9.5	10.167	9.033	8.267	9.167	10.133	9.133	9	10.5
1999	6	12.933	12.9	13.1	12.933	12.8	12.733	12.5	12.033	11.967	11.167	12.3	13.267	11.8	12.233	11.4	10.4	9.233	10.2	10.3	11.367	10.2	10.567	9.5	12.3	11.667	9.3	10.033	8.367	9.1	9.333	9.433	9.667	8.433	10.567	7.967	9.833	11.5	10.967	11.4	9.067	9.933	8.6	7.7	8.8	9.967	8.633	8.367	10.033
1999	7	14.567	14.633	14.633	15.167	14.3	14.367	14.133	13.633	13.433	12.5	13.867	15.467	14.1	14	13.167	12.967	11.567	12.533	12.467	13.4	11.833	10.333	10.367	13.167	12.7	11.933	12.8	10.933	11.667	10.6	10.533	10.5	8.933	10.767	7.867	10.633	12.2	12.067	12.7	10.533	11.633	10.2	9.1	10.267	11.333	9.633	9	10.367
1999	8	13.867	14.067	14.167	14	13.867	13.9	13.733	13.333	13.167	12.4	13.367	14.233	13	13.567	12.833	12.5	11.367	12.233	12.2	13.067	11.733	11.6	10.333	13.5	13.1	11.533	12.3	10.7	11.367	11.533	11.5	11.533	10.167	11.9	9.267	10.6	12.367	11.033	11.567	11.4	12.367	11.1	10.167	11.233	12.2	10.7	10.2	11.467
2000	3	11.133	10.767	11.033	11.267	10.6	10.5	10.267	9.9	9.8	9.333	10.6	11.467	10.333	10.1	9.4	8.367	7.5	8.133	8.267	9.167	8.467	9.133	8.533	10.1	9.6	7.6	7.967	6.7	7.133	7.3	7.467	7.767	7.033	8.767	7.133	8.633	9.9	9.1	9.267	7.133	7.633	6.633	5.967	6.767	7.6	6.833	6.767	8.133
2000	4	13.767	13.267	13.467	13.8	13.533	13.467	13.267	12.833	12.767	12.067	13.2	13.967	12.767	13.067	12.367	11.533	10.533	11.3	11.367	12.267	11.233	11.633	10.767	13	12.533	10.667	11.267	9.8	10.333	10.5	10.567	10.767	9.7	11.433	9.4	10.733	12.333	11.9	12.333	10.367	11.133	10	9.167	10.033	10.933	9.833	9.567	10.9
2000	5	13.1	12.7	12.9	13.033	12.7	12.633	12.367	12	11.867	11.333	12.533	13.233	12.033	12.2	11.5	10.433	9.533	10.233	10.333	11.233	10.433	11	10.333	12.233	11.7	9.633	10.133	8.767	9.233	9.433	9.567	9.8	8.967	10.7	8.9	10.5	11.933	11.167	11.433	9.3	9.9	8.867	8.133	8.967	9.867	8.867	8.767	10.167
2000	6	14.967	15.133	15.333	14	13.567	13.533	14.567	14.167	14.033	13.3	14.333	14.333	12.867	13.067	12.267	12.067	10.967	11.833	11.933	12.967	11.833	12.167	11	13.933	12.533	10.333	11.733	10.2	10.833	11.067	11.2	11.4	10.233	12.2	9.8	11.367	13.367	12.7	13.133	10.867	11.667	10.467	9.533	10.633	11.7	10.433	10.2	11.7
2000	7	14.067	14.333	14.367	13.467	13.3	13.3	14	13.533	13.333	12.4	13.367	13.8	12.467	12.967	12.167	12.3	10.933	11.833	11.8	12.667	11.167	10.933	9.567	13.167	12.533	10.967	12.133	10.367	11.067	11.2	11.167	11.133	9.567	11.333	8.5	9.867	12.133	12.1	12.733	11.2	12.267	10.9	9.867	10.967	12	10.3	9.7	10.967
2000	8	13.333	13.567	13.6	12.8	12.633	12.667	13.2	12.8	12.7	11.9	12.833	13.033	11.833	12.333	11.567	11.633	10.433	11.367	11.333	12.233	10.933	10.8	9.667	12.433	11.867	10.467	11.433	9.8	10.5	10.7	10.7	10.733	9.3	11.1	8.5	9.933	11.9	11.4	12	10.5	11.5	10.233	9.3	10.4	11.367	9.867	9.4	10.633
2001	3	12.4	12.067	12.333	11.567	11.533	11.433	11.233	10.867	10.833	10.333	11.933	11.767	10.6	11	10.3	9.267	8.4	9.1	9.267	10.167	9.5	10.233	9.667	10.867	10.333	8.467	8.867	7.567	8.033	8.333	8.533	8.867	8.1	9.9	8.167	9.867	11.133	9.8	10	8.067	8.6	7.6	6.933	7.767	8.633	7.9	7.867	9.267
2001	4	12.933	12.4	12.6	13.067	12.933	12.867	12.6	12.167	12	11.333	12.3	13	12.067	12.467	11.767	10.867	9.833	10.533	10.533	10.867	9.9	10.3	9.5	11.867	11.367	9.467	10	8.467	8.967	9.133	9.233	9.367	8.367	10.067	8.1	9.567	11	10.767	11.133	9.067	9.733	8.633	7.8	8.667	9.533	8.433	8.233	9.533
2001	5	14.3	13.9	14.1	14.267	14.133	14.067	13.833	13.467	13.333	12.733	13.733	14.3	13.2	13.567	12.867	11.833	10.867	11.667	11.8	12.367	11.433	12	11.267	13.167	12.667	10.6	11.2	9.733	10.267	10.5	10.667	10.867	9.933	11.833	9.833	11.567	12.967	12.033	12.4	10.233	10.933	9.867	9.2	10.1	11	10	9.867	11.3
2001	6	14.533	14.467	14.6	14.633	14.467	14.433	14.2	13.733	13.6	12.8	13.9	14.867	13.567	14.033	13.233	12.267	11.167	12.033	12.1	13	11.833	12.067	11.3	13.967	13.4	11.2	11.9	10.333	11.033	11.233	11.3	11.433	10.167	12.167	9.7	11.633	13.2	12.767	13.233	11.067	12	10.8	9.933	10.967	12	10.6	10.233	11.767
2001	7	12.967	13.167	13.133	13.4	13.233	13.233	13.033	12.5	12.3	11.433	12.267	13.7	12.467	13.033	12.2	11.9	10.667	11.467	11.367	12.167	10.733	10.733	9.433	13.233	12.9	11.067	11.8	10.133	10.767	11.2	11.133	11.033	9.567	11.133	8.4	9.5	11.033	12.3	12.9	11.233	12.2	10.933	9.967	10.933	11.833	10.3	9.7	10.767
2001	8	13.567	13.667	13.733	13.7	13.533	13.633	13.433	13.033	12.9	12.2	13	13.933	12.867	13.3	12.6	12.4	11.367	12.1	12.133	12.833	11.633	11.467	10.333	13.3	12.933	10.867	11.567	10.1	10.633	10.8	11.533	11.567	10.3	11.8	9.4	10.533	11.9	11.7	12.167	10.7	11.567	10.467	9.633	10.567	12.167	10.8	10.333	11.433
2002	3	14.2	13.833	14.067	14.167	14	13.933	13.7	13.367	13.267	12.8	13.733	14.367	13.233	13.5	12.8	11.8	10.9	11.6	11.733	12.633	11.933	12.567	11.833	13.5	13	11	11.433	10.1	10.567	10.767	10.933	11.2	10.467	12.2	10.567	11.967	13.233	12.5	12.667	10.567	11.067	10.133	9.433	10.233	11.067	10.267	10.2	11.6
2002	4	14.3	13.8	13.967	14.567	14.3	14.267	13.967	13.567	13.4	12.733	13.667	14.8	13.633	13.867	13.167	12.3	11.3	11.967	11.967	12.833	11.867	12.2	11.167	13.867	13.367	11.5	12.033	10.567	11.067	11.2	11.267	11.367	10.4	12.033	10.067	11.267	12.633	12.833	13.167	11.167	11.767	10.667	9.933	10.767	11.567	10.5	10.2	11.5
2002	5	14.7	14.033	14.3	14.8	14.567	14.5	14.267	13.833	13.767	13.2	14.167	15	13.8	14.1	13.367	12.033	11.133	11.867	11.967	12.867	12.1	12.733	11.9	14.133	13.6	11.2	11.667	10.333	10.8	11	11.167	11.433	10.6	12.433	10.633	12.067	13.533	13.067	13.333	10.833	11.4	10.333	9.567	10.4	11.333	10.467	10.4	11.833
2002	6	16.033	15.833	16	16.3	15.933	15.9	15.633	15.2	15.033	14.333	15.367	16.633	15.2	15.633	14.633	13.867	12.767	13.667	13.767	14.733	13.6	13.867	12.767	15.667	15.1	12.867	13.567	12	12.6	12.833	12.933	13.133	11.967	13.867	11.467	13	14.433	14.1	14.467	12.633	13.433	12.167	11.267	12.333	13.367	12.167	11.9	13.433
2002	7	15.467	15.5	15.5	15.9	15.733	15.733	15.5	14.967	14.767	13.933	14.733	16.233	15	15.5	14.733	14.567	13.333	14.1	14.033	14.833	13.433	13.1	11.867	15.533	15.133	13.7	14.467	12.8	13.4	13.5	13.4	13.367	11.867	13.467	10.8	12	13.433	14.167	14.8	13.6	14.533	13.2	12.2	13.167	14.1	12.567	11.967	13.133
2002	8	14.033	14.133	14.233	14.333	14.267	14.267	14.067	13.667	13.5	12.767	13.467	14.6	13.467	14	13.233	13	11.933	12.7	12.667	13.433	12.167	12.233	11.067	14	13.6	12.133	12.9	11.333	11.933	12.3	12.233	12.233	10.933	12.533	10.067	11.3	12.7	13.067	13.6	12.233	13.1	11.9	11.033	12	12.867	11.467	10.967	12.167
2003	3	13.4	13.067	13.367	13.433	13.267	13.167	12.967	12.6	12.533	12.067	12.933	13.633	12.5	12.767	12.067	11	10.167	10.833	11	11.9	11.167	11.9	11.233	12.8	12.267	10.233	10.633	9.333	9.767	9.967	10.167	10.433	9.733	11.533	9.833	11.367	12.633	11.767	11.933	9.8	10.267	9.267	8.6	9.4	10.267	9.5	9.5	10.867
2003	4	15.1	14.567	14.733	15.267	15.167	15.133	14.867	14.467	14.3	13.7	14.433	15.467	14.333	14.733	14.033	13.167	12.167	12.867	12.9	13.733	12.767	13.133	12.267	14.667	14.267	12.367	12.867	11.433	11.933	12.1	12.167	12.3	11.3	12.967	11.067	12.367	13.7	13.667	14	12	12.667	11.6	10.833	11.667	12.467	11.433	11.2	12.467
2003	5	15.1	14.533	14.733	15.333	14.967	14.9	14.633	14.3	14.2	13.6	14.533	15.433	14.333	14.633	13.767	12.667	11.767	12.467	12.567	13.467	12.633	13.233	12.433	14.633	14.133	11.867	12.333	11	11.5	11.7	11.8	12.033	11.2	12.933	11.167	12.567	14	13.6	13.767	11.5	12.067	11.067	10.367	11.167	12.033	11.133	11	12.4
2003	6	15.467	15.433	15.6	16	15.867	15.767	15.5	15.033	14.867	14.167	14.833	16.3	15	15.4	14.633	13.533	12.467	13.3	13.333	14.267	13.2	13.4	12.5	15.467	14.967	12.7	13.3	11.8	12.367	12.533	12.6	12.733	11.6	13.433	11.167	12.7	14.2	14.4	14.767	12.467	13.233	12.033	11.167	12.1	13.067	11.833	11.6	13
2003	7	14.8	14.933	14.9	15.633	15.733	15.733	15.5	15.033	14.8	14	14.133	15.967	14.8	15.5	14.767	14.433	13.267	14.033	13.933	14.667	13.333	12	12.067	14.467	14.033	13.6	14.3	12.733	13.333	12.433	12.367	12.267	10.9	12.4	9.867	12.267	13.7	13.533	14.033	12.533	13.4	12.2	11.233	12.2	13.067	11.567	11	12.133
2003	8	14.233	14.333	14.333	14.567	14.5	14.533	14.367	13.967	13.833	13.1	13.633	14.767	13.667	14.3	13.567	13.4	12.333	13.067	13.033	13.767	12.567	11.7	11.5	13.333	12.967	12.533	13.2	11.767	12.333	11.733	11.7	11.7	10.467	11.933	9.667	11.667	13.067	12.433	12.9	11.667	12.533	11.433	10.6	11.5	12.333	11	10.533	11.633
2004	3	12.533	12.1	12.4	12.567	12.4	12.333	12.1	11.7	11.633	11.133	12.1	12.8	11.6	11.867	11.133	9.833	8.9	9.633	9.767	10.733	9.967	10.7	9.833	11.933	11.4	9.033	9.467	8.067	8.567	8.8	8.967	9.233	8.467	10.4	8.667	10.2	11.567	11.267	11.233	8.533	9.133	8.1	7.433	8.267	9.167	8.333	8.233	9.767
2004	4	14.967	14.5	14.667	15.167	15	14.9	14.667	14.267	14.1	13.467	14.333	15.4	14.233	14.6	13.833	12.933	11.967	12.633	12.7	13.5	12.633	12.933	12.067	14.6	14.1	12.167	12.7	11.233	11.733	11.9	11.967	12.1	11.133	12.8	10.867	12.167	13.433	14.467	14.767	11.867	12.5	11.4	10.6	11.467	12.3	11.233	11	12.233
2004	5	14.967	14.7	15	14.833	14.833	14.733	14.467	14.1	14	13.467	14.467	15.1	13.867	14.167	13.6	12.167	11.267	11.967	12.1	13.1	12.333	13.033	12.2	14.233	13.667	11.333	11.8	10.433	10.933	11.133	11.3	11.633	10.833	12.733	10.967	12.5	13.8	14.1	14.3	10.967	11.533	10.433	9.7	10.567	11.5	10.633	10.6	12.167
2004	6	15.9	15.833	16	16.067	15.8	15.733	15.533	15.067	14.933	14.167	15.2	16.367	15	15.4	14.533	13.733	12.633	13.5	13.567	14.5	13.333	13.533	12.4	15.433	14.867	12.767	13.4	11.833	12.467	12.7	12.8	12.9	11.7	13.567	11.067	12.567	14.2	15.233	15.833	12.5	13.3	12.1	11.233	12.233	13.3	12	11.667	13.033
2004	7	14.967	15.033	15	15.367	15.233	15.267	15.033	14.5	14.267	13.367	14.133	15.633	14.4	14.967	14.2	13.967	12.7	13.467	13.367	14.1	12.633	12.233	11	14.933	14.5	13.067	13.833	12.133	12.733	12.8	12.7	12.6	11.1	12.6	9.933	11.1	12.667	13.9	14.467	12.933	13.867	12.533	11.5	12.533	13.4	11.8	11.2	12.3
2004	8	14.833	14.667	14.667	15.033	14.967	14.967	14.767	14.3	14.167	13.333	14.067	15.3	14.133	14.633	13.967	13.733	12.6	13.367	13.233	13.967	12.633	12.333	11.133	14.633	14.233	12.9	13.6	12.033	12.6	12.667	12.6	12.5	11.167	12.633	10.067	11.233	12.733	13.367	13.8	12.733	13.6	12.367	11.433	12.4	13.2	11.733	11.167	12.267
2005	3	14.467	14.133	14.4	14.7	14.3	14.233	13.967	13.633	13.567	13.067	14	14.9	13.767	14	13.1	12.267	11.467	12.1	12.267	13.133	12.4	13	12.233	14.067	13.533	11.5	11.933	10.6	11.1	11.233	11.433	11.733	10.967	12.667	10.933	12.3	13.5	13	12.867	11.1	11.567	10.6	9.933	10.733	11.6	10.8	10.733	12.033
2005	4	15.133	14.567	14.733	15.3	15.167	15.1	14.8	14.4	14.2	13.533	14.467	15.5	14.3	14.667	13.933	12.933	11.867	12.633	12.667	13.533	12.467	12.7	11.7	14.633	14.167	12.033	12.633	11.067	11.633	11.8	11.867	12	10.833	12.533	10.3	11.6	13.2	13.433	13.433	11.7	12.433	11.233	10.433	11.333	12.2	11.033	10.733	11.967
2005	5	15.3	14.833	15.1	15.567	15.267	15.133	14.9	14.5	14.4	13.8	14.7	15.767	14.6	14.867	14.067	13.367	12.4	13.067	13.2	14	13.133	13.467	12.633	14.933	14.4	12.533	13.033	11.6	12.1	12.233	12.4	12.567	11.633	13.2	11.2	12.533	14.033	13.8	14.1	12.167	12.733	11.667	10.9	11.7	12.6	11.667	11.433	12.667
2005	6	15.367	15.167	15.333	15.667	15.4	15.333	15.033	14.567	14.467	13.7	14.7	16	14.667	15	14.1	13.133	12.067	12.933	12.967	13.933	12.767	12.667	11.567	15.067	14.5	12.233	12.833	11.3	11.867	12.1	12.2	12.367	11.1	12.733	10.067	11.433	13.267	13.733	13.867	11.967	12.733	11.467	10.6	11.633	12.633	11.4	11.033	12.3
2005	7	15.033	15.067	15.067	15.533	15.3	15.3	15.067	14.567	14.3	13.433	14.3	15.833	14.6	15.1	14.267	14.233	12.967	13.733	13.633	14.467	13.033	12.7	11.467	15.133	14.733	13.333	14.067	12.4	13	13.1	13.033	12.967	11.533	13.067	10.4	11.6	13.067	14.167	14.833	13.2	14.2	12.833	11.867	12.9	13.8	12.2	11.633	12.767
2005	8	14.433	14.533	14.567	14.667	14.467	14.467	14.3	13.9	13.733	13	13.833	14.967	13.833	14.3	13.467	13.4	12.333	13.1	13.033	13.833	12.6	12.467	11.3	14.267	13.9	12.567	13.267	11.733	12.3	12.467	12.433	12.433	11.133	12.7	10.3	11.467	12.733	13.5	13.867	12.4	13.267	12.1	11.2	12.2	13.067	11.667	11.2	12.333
2006	3	13.967	13.667	13.967	13.967	13.8	13.7	13.5	13.133	13.067	12.567	13.5	14.233	13.1	13.333	12.633	11.667	10.867	11.467	11.6	12.5	11.833	12.433	11.633	13.367	12.867	10.967	11.367	10.033	10.467	10.7	10.867	11.133	10.467	12.1	10.367	11.6	12.867	12.367	12.533	10.5	10.967	10.067	9.367	10.133	10.967	10.233	10.2	11.467
2006	4	14.067	13.533	13.667	14.333	14.2	14.1	13.8	13.4	13.2	12.567	13.333	14.533	13.433	13.733	13.067	12.367	11.433	12	11.967	12.733	11.767	12.033	11.167	13.733	13.3	11.667	12.133	10.667	11.133	11.233	11.267	11.367	10.367	11.8	9.9	11.067	12.433	12.667	12.967	11.3	11.833	10.8	10.033	10.8	11.533	10.5	10.2	11.267
2006	5	14.5	14.133	14.333	14.667	14.4	14.3	14.067	13.667	13.6	12.967	13.833	14.933	13.767	14.033	13.2	12.467	11.533	12.233	12.3	13.1	12.167	12.2	11.267	14.067	13.567	11.667	12.1	10.8	11.3	11.467	11.533	11.667	10.6	12	9.767	10.933	12.533	12.967	12.933	11.333	11.9	10.9	10.133	10.933	11.8	10.767	10.467	11.5
2006	6	16	16.033	16.2	16.267	15.833	15.8	15.533	15.167	15.067	14.333	15.4	16.567	15.167	15.6	14.567	13.833	12.733	13.633	13.7	14.733	13.6	13.867	12.8	15.667	15.067	12.867	13.533	11.967	12.6	12.833	12.9	13.1	11.967	13.933	11.533	13.1	14.333	14.267	14.633	12.633	13.433	12.167	11.267	12.333	13.433	12.167	11.9	13.467
2006	7	14.833	14.933	14.933	15.467	15.167	15.133	14.9	14.367	14.167	13.267	14.1	15.8	14.533	15.033	14.133	13.967	12.767	13.5	13.4	14.2	12.8	12.467	11.2	15.1	14.667	13.133	13.867	12.167	12.767	12.9	12.8	12.767	11.3	12.867	10.167	11.4	12.833	14.133	14.667	12.967	13.933	12.6	11.6	12.6	13.567	12	11.4	12.533
2006	8	14.3	14.4	14.433	14.633	14.4	14.4	14.233	13.833	13.667	12.933	13.767	14.867	13.767	14.233	13.433	13.3	12.2	13	12.933	13.7	12.5	12.267	11.133	14.233	13.867	12.433	13.133	11.667	12.233	12.4	12.367	12.367	11.033	12.567	10.133	11.267	12.633	13.467	13.9	12.333	13.2	12.033	11.167	12.1	13	11.567	11.133	12.233
2007	3	14.233	13.9	14.133	13.6	13.567	13.467	13.2	13.4	13.3	12.833	13.767	13.833	12.7	12.967	12.367	10.967	11.033	11.667	11.8	12.667	12	12.667	11.933	12.967	12.467	10.233	10.633	10.2	10.667	10.833	11	11.3	10.6	12.3	10.7	12.1	13.3	10.367	10.567	9.8	10.267	10.233	9.533	10.3	11.133	10.367	10.367	11.7
2007	4	15.167	14.8	15	14.733	14.567	14.433	14.867	14.4	14.2	13.6	14.5	13.833	13.8	14.4	13.7	13	12.033	12.7	12.733	13.533	12.6	11.933	12.067	12.6	11.767	12.033	12.733	11.267	11.767	10.767	10.833	11	10.067	11.733	9.833	12.133	13.667	11.533	11.933	10.7	11.333	10.267	9.5	10.367	11.167	10.133	9.9	11.167
2007	5	15.933	15.6	15.8	15.467	15.267	15.167	15.567	15.167	15.067	14.5	15.4	15.133	14.433	15.233	14.5	13.7	12.733	13.467	13.567	14.5	13.667	13.667	13.267	14.5	13.467	12.6	13.367	11.967	12.5	12.033	12.167	12.433	11.567	13.367	11.567	13.367	14.567	13.4	13.667	11.9	12.5	11.4	10.667	11.5	12.433	11.467	11.367	12.833
2007	6	15.967	16	16.167	15.367	15.367	15.3	15.567	15.1	15	14.233	15.367	15.7	14.233	14.833	14	13.8	12.667	13.567	13.7	14.733	13.567	13.833	12.7	14.067	13.5	12	13.5	11.833	12.5	12.767	12.9	13.067	11.867	13.9	11.4	13	14.667	12.833	13.267	12.533	13.4	12.1	11.167	12.267	13.367	12.1	11.833	13.367
2007	7	14.467	14.533	14.533	14.767	14.533	14.5	14.3	13.933	13.733	12.9	13.733	15.067	13.9	14.267	13.533	13.367	12.233	12.967	12.867	13.633	12.267	11.967	10.8	13.233	12.867	12.367	13.3	11.667	12.267	12.333	12.333	12.233	10.833	12.367	9.8	10.933	12.4	12.3	12.833	12.467	13.4	12.1	11.133	12.133	13.033	11.533	10.933	12.033
2007	8	14.733	14.8	14.833	14.7	14.533	14.533	14.667	14.233	14.1	13.333	14.167	14.933	13.833	14.267	13.533	13.633	12.5	13.3	13.233	14.033	12.8	12.633	11.467	12.533	12.167	12.467	13.467	11.933	12.533	12.667	12.633	12.633	11.367	12.9	10.5	11.7	13.067	11.633	12.1	12.6	13.467	12.3	11.433	12.4	13.267	11.9	11.467	12.6
2008	3	12.167	11.8	12.1	12.133	11.933	11.833	11.567	11.333	11.233	10.667	11.7	11.8	11.167	11.433	10.7	9.767	8.867	9.533	9.667	10.633	9.9	10.667	9.867	10.867	10.333	8.867	9.467	8	8.5	8.667	8.9	9.167	8.4	10.3	8.6	10.1	11.333	9.767	10.033	8.567	9.033	7.967	7.233	8.067	9	8.2	8.167	9.633
2008	4	12.167	11.8	12.1	12.133	11.933	11.833	11.567	11.333	11.233	10.667	11.7	11.8	11.167	11.433	10.7	9.767	8.867	9.533	9.667	10.633	9.9	10.667	9.867	10.867	10.333	8.867	9.467	8	8.5	8.667	8.9	9.167	8.4	10.3	8.6	10.1	11.333	9.767	10.033	8.567	9.033	7.967	7.233	8.067	9	8.2	8.167	9.633
2008	5	15.633	15.233	15.5	14.8	14.6	14.6	14.333	14.833	14.733	14.167	15.067	14.833	13.867	14.167	13.433	13.3	12.367	13.1	13.2	14.1	13.233	13.733	12.867	13.967	13.467	11.633	12.967	11.6	12.067	12.267	12.433	12.633	11.767	13.533	11.567	13	14.433	12.933	13.167	12.167	12.767	11.7	10.9	11.767	12.667	11.767	11.6	12.933
2008	6	15.8	15.733	15.9	15.167	15	14.967	14.7	14.9	14.8	14.033	15.133	15.6	14.067	14.5	13.667	13.367	12.233	13.133	13.233	14.267	13.067	13.267	12.1	14.633	14.067	11.7	13.033	11.433	12.1	12.333	12.4	12.6	11.367	13.333	10.8	12.333	13.967	13.367	13.8	12.133	12.967	11.7	10.767	11.833	12.933	11.633	11.367	12.867
2008	7	14.7	14.8	14.8	14.733	14.567	14.633	14.367	14.267	14.033	13.1	13.933	14.767	13.733	14.3	13.533	13.6	12.333	13.2	13.067	13.9	12.433	12	10.667	14.067	13.633	12.3	13.467	11.767	12.4	12.533	12.433	12.367	10.867	12.4	9.567	10.667	12.333	13.067	13.633	12.6	13.6	12.267	11.267	12.3	13.2	11.6	10.967	12.067
2008	8	14.3	14.433	14.467	14.133	14.033	14.067	13.867	13.767	13.667	12.867	13.767	13.5	13.267	13.767	13	13.133	11.967	12.833	12.8	13.633	12.333	12.167	10.933	12.833	12.4	11.9	13	11.4	12.067	12.2	12.133	12.167	10.833	12.5	9.933	11.233	12.567	11.833	12.367	12.133	13.067	11.8	10.867	11.9	12.833	11.367	10.833	12.1
2009	3	14.233	13.933	14.167	13.733	13.467	13.4	13.133	13.433	13.333	12.833	13.8	14	12.833	13.033	12.267	11.3	11	11.633	11.767	12.667	12	12.667	11.9	13.133	12.633	10.567	10.967	10.233	10.633	10.8	11	11.267	10.567	12.333	10.667	12.067	13.333	11.767	11.833	10.1	10.6	10.2	9.533	10.267	11.1	10.367	10.333	11.7
2009	4	14.333	13.833	13.967	14.3	13.9	13.867	13.567	13.6	13.4	12.767	13.667	14.533	13.333	13.433	12.733	12.233	11.233	11.9	11.967	12.833	11.833	12.233	11.3	12.9	12.433	10.933	11.967	10.467	10.967	11.167	11.2	11.367	10.367	12.033	10.067	11.433	12.833	11.867	12.2	11.067	11.733	10.633	9.833	10.667	11.5	10.433	10.2	11.5
2009	5	14.633	14.2	14.467	13.967	13.833	13.767	13.5	13.767	13.7	13.1	14	13.6	12.967	13.3	12.6	12.2	11.233	12	12.067	13	12.1	12.433	11.5	12.7	12.233	10.667	11.833	10.433	10.933	11.133	11.267	11.467	10.533	12.167	9.933	11.3	13.033	11.6	11.9	10.967	11.6	10.433	9.7	10.567	11.5	10.5	10.333	11.567
2009	6	15.333	15.3	15.433	15.333	14.8	14.8	14.5	14.467	14.4	13.6	14.7	15.7	14.233	14.667	13.5	12.467	11.767	12.7	12.8	13.8	12.667	12.767	11.567	14.767	14.167	11.467	12.167	10.967	11.667	11.867	11.967	12.167	10.967	12.833	10.1	11.633	13.433	13.333	13	11.233	12.067	11.2	10.267	11.4	12.5	11.233	10.9	12.333
2009	7	14.7	14.767	14.8	14.9	14.733	14.767	14.533	14.167	13.967	13.1	14	15.233	13.9	14.467	13.633	13.467	12.267	13.1	13	13.867	12.4	12.133	10.8	14.5	14.067	12.533	13.3	11.633	12.3	12.433	12.367	12.333	10.8	12.5	9.767	11	12.533	12.167	12.833	12.433	13.4	12.133	11.1	12.167	13.167	11.5	10.9	12.167
2009	8	14.733	14.867	14.867	14.7	14.4	14.433	14.267	14.2	14.1	13.3	14.2	14.967	13.8	14.3	13.367	13.267	12.467	13.233	13.2	14.067	12.767	12.6	11.4	14.3	13.9	12.367	13.1	11.833	12.467	12.6	12.567	12.567	11.267	12.867	10.367	11.6	13	11.633	12.133	12.267	13.167	12.233	11.3	12.3	13.267	11.8	11.3	12.467
2010	3	13.233	12.867	13.1	12.8	12.5	12.4	12.2	12.367	12.3	11.867	12.767	13	11.9	12.133	11.3	10.433	9.933	10.6	10.733	11.667	10.967	11.667	10.933	12.167	11.633	9.667	10.067	9.133	9.567	9.8	9.967	10.233	9.6	11.3	9.733	11.133	12.3	9.767	9.8	9.267	9.733	9.1	8.433	9.2	10.067	9.367	9.333	10.7
2010	4	14.367	13.833	14	14.067	13.933	13.833	13.567	13.6	13.433	12.8	13.7	14.3	13.1	13.467	12.733	12.067	11.3	12	12	12.867	11.9	12.3	11.4	13.467	12.967	11.3	11.8	10.533	11.033	11.2	11.233	11.4	10.433	12.1	10.1	11.467	12.867	10.6	10.967	10.9	11.567	10.667	9.867	10.733	11.567	10.5	10.233	11.533
2010	5	15.033	14.6	14.8	14.333	14.2	14.1	13.867	14.167	14.067	13.433	14.367	14.567	13.367	13.667	12.967	12	11.667	12.367	12.467	13.333	12.4	12.533	11.633	13.7	13.2	11.133	11.633	10.867	11.367	11.567	11.7	11.833	10.8	12.333	10.167	11.467	13.167	10.967	10.933	10.8	11.4	10.933	10.167	11.033	11.933	10.933	10.633	11.767
2010	6	15.733	15.7	15.833	15.3	15	14.967	14.733	14.9	14.8	14.033	15.1	15.633	14.2	14.633	13.667	12.867	12.233	13.167	13.233	14.267	13.1	13.267	12.133	14.7	14.133	11.9	12.567	11.433	12.1	12.3	12.433	12.633	11.4	13.3	10.8	12.333	14	11.6	11.8	11.633	12.5	11.7	10.8	11.9	12.933	11.7	11.4	12.833
2010	7	14.533	14.767	14.767	14.967	14.633	14.667	14.4	14.067	13.867	13	13.867	15.267	14.033	14.433	13.567	13.367	12.167	13	12.933	13.733	12.333	12.1	10.867	14.533	14.033	12.467	13.233	11.667	12.267	12.367	12.3	12.267	10.833	12.467	9.867	11.1	12.633	13.5	14.1	12.4	13.333	12.067	11.067	12.133	13.033	11.467	10.933	12.133
2010	8	13.267	13.367	13.433	13.233	13.033	13.1	12.933	12.767	12.667	11.9	12.733	13.5	12.4	12.867	12.133	12.067	11.1	11.833	11.833	12.6	11.433	11.367	10.333	12.833	12.5	11.2	11.867	10.567	11.133	11.233	11.233	11.267	10.067	11.667	9.5	10.8	11.9	9.967	10.733	11.1	11.933	10.9	10.067	11.033	11.867	10.567	10.133	11.367
2011	3	12.933	12.533	12.833	12.533	12.2	12.1	11.9	12.033	12	11.433	12.4	12.733	11.567	11.733	11	10.467	9.6	10.267	10.4	11.333	10.567	11.2	10.367	10.467	9.933	9.167	10.133	8.733	9.233	9.433	9.6	9.867	9.133	10.867	9.033	10.467	11.767	9.367	9.6	9.233	9.733	8.733	8.067	8.833	9.733	8.9	8.867	10.2
2011	4	14.5	13.967	14.133	14.2	14.033	13.933	13.633	13.8	13.6	13	13.833	14.4	13.267	13.567	12.833	12	11.5	12.133	12.167	12.967	12.033	12.433	11.6	13.6	13.1	11.233	11.733	10.733	11.2	11.333	11.433	11.533	10.6	12.233	10.367	11.667	13.033	11.067	11.4	10.8	11.467	10.833	10.033	10.867	11.7	10.633	10.433	11.733
2011	5	13.9	13.533	13.767	13.233	13.1	13	12.8	13.1	13	12.467	13.433	13.467	12.233	12.567	11.9	11.133	10.633	11.333	11.5	12.433	11.6	12.233	11.367	12.6	12.1	10.3	10.8	9.833	10.333	10.533	10.667	10.967	10.133	11.967	10.2	11.667	12.967	9.867	10.3	9.967	10.533	9.867	9.1	9.967	10.9	10	9.967	11.4
2011	6	14.3	14.233	14.4	13.8	13.6	13.567	13.333	13.433	13.333	12.567	13.633	14.1	12.7	13.1	12.267	11.367	10.733	11.633	11.767	12.767	11.667	11.933	10.833	13.167	12.6	10.333	11.033	9.9	10.567	10.833	10.933	11.133	9.967	11.967	9.533	11.133	12.733	10.267	10.467	10.1	10.9	10.133	9.2	10.3	11.4	10.167	9.933	11.533
2011	7	14.2	14.3	14.3	14.333	14.267	14.267	14.233	13.7	13.5	12.633	13.5	14.667	13.367	13.967	13.167	13.267	12	12.833	12.733	13.567	12.133	11.833	10.567	14.167	13.733	11.967	13.133	11.4	12.067	12.2	12.1	12.033	10.567	12.2	9.533	10.833	12.2	13.133	13.7	12.233	13.233	11.9	10.833	11.9	12.867	11.267	10.667	11.9
2011	8	13.967	14.167	14.167	13.8	13.7	13.7	13.567	13.467	13.3	12.567	13.4	14.067	12.9	13.367	12.7	12.567	11.667	12.467	12.467	13.267	12	11.8	10.633	13.633	13.233	11.633	12.4	11.067	11.667	11.833	11.833	11.833	10.533	12.133	9.633	10.867	12.367	13.133	13.733	11.5	12.4	11.433	10.567	11.533	12.433	11.033	10.567	11.733
2012	3	12.533	12.2	12.5	12.133	11.933	11.833	11.633	11.7	11.633	11.1	12.1	12.333	11.167	11.433	10.7	9.433	9.267	9.933	10.1	11	10.267	11	10.2	11.5	10.967	8.667	9.1	8.433	8.9	9.133	9.267	9.6	8.8	10.6	8.9	10.333	11.667	10.4	10.6	8.233	8.733	8.4	7.767	8.567	9.433	8.633	8.567	9.967
2012	4	15.1	14.533	14.733	14.833	14.733	14.633	14.767	14.3	14.133	13.5	14.4	15.1	13.933	14.233	13.5	13.033	12.033	12.733	12.767	13.6	12.667	13.133	12.233	14.667	13.733	11.8	12.767	11.233	11.733	11.867	12	12.133	11.167	12.933	11	12.433	13.733	13.6	13.9	11.8	12.467	11.333	10.533	11.4	12.267	11.233	11	12.333
2012	5	15.5	15.1	15.333	14.733	14.633	14.567	15.033	14.667	14.533	13.933	14.933	14.933	13.767	14.1	13.4	13.033	12.1	12.833	12.933	13.867	13.033	13.667	12.8	14.733	13.6	11.533	12.7	11.267	11.767	11.967	12.167	12.367	11.5	13.333	11.467	12.933	14.4	13.6	13.933	11.8	12.4	11.3	10.533	11.433	12.333	11.4	11.3	12.733
2012	6	15.967	15.9	16.067	16.033	15.867	15.833	15.6	15.167	15.033	14.3	15.3	16.367	14.933	15.367	14.567	13.533	12.433	13.333	13.467	14.433	13.233	13.267	12.1	15.4	14.8	12.567	13.2	11.667	12.3	12.533	12.633	12.833	11.533	13.4	10.767	12.267	13.933	14.2	14.6	12.333	13.167	11.867	11	12.033	13.133	11.833	11.5	12.933
2012	7	14.867	15	14.967	14.9	14.733	15.133	14.9	14.4	14.2	13.367	14.133	15.233	14.033	14.5	14.167	13.833	12.6	13.333	13.267	14.067	12.633	12.333	11.167	14.567	14.133	12.567	13.7	12.067	12.6	12.733	12.7	12.6	11.167	12.733	10.167	11.6	13.033	13.567	14.133	12.867	13.8	12.467	11.467	12.467	13.367	11.867	11.267	12.433
2012	8	14.233	14.233	14.233	14	13.867	13.867	14.2	13.8	13.6	12.833	13.533	12.433	13.1	14.133	13.4	13.167	12.067	12.8	12.733	13.467	12.033	10.767	10.4	12.3	11.733	12.333	13	11.467	12.067	10.667	10.667	10.667	9.467	11.033	8.733	10.2	11.9	11.367	11.9	10.567	11.5	10.367	9.533	10.5	11.367	9.933	9.533	10.733
2013	3	14.7	14.367	14.6	14.8	14.6	14.5	14.2	13.867	13.767	13.3	14.2	15.1	13.933	14.1	13.433	12.233	11.433	12.033	12.167	13.033	12.333	12.9	12.2	14.2	13.667	11.567	11.9	10.6	11.067	11.2	11.4	11.633	10.933	12.5	10.867	12.233	13.433	13.167	13.333	11.1	11.5	10.567	9.933	10.667	11.5	10.733	10.667	11.933
2013	4	15.8	15.233	15.3	15.533	15.4	15.267	15.533	15.1	14.9	14.233	14.933	15.733	14.633	14.933	14.267	14	13.067	13.667	13.633	14.3	13.233	13.233	12.367	15.533	14.5	12.533	13.767	12.367	12.833	12.933	12.9	12.9	11.767	13.1	11.033	12.233	13.6	14.6	14.867	12.933	13.567	12.567	11.8	12.567	13.233	12.067	11.6	12.533
2013	5	16.2	15.8	16.033	15.533	15.367	15.3	15.9	15.5	15.433	14.833	15.667	15.767	14.533	15.667	14.933	13.833	12.833	13.633	13.767	14.7	13.833	14.467	13.5	15.667	15.167	12.9	13.467	11.967	12.533	12.733	12.933	13.167	12.2	14.1	12.167	13.733	15.2	14.533	14.833	12.533	13.133	12.033	11.267	12.133	13.133	12.1	11.967	13.433
2013	6	16.4	16.367	16.5	16.5	16.333	16.267	16	15.533	15.467	14.733	15.733	16.867	15.4	15.867	14.967	13.9	12.767	13.7	13.833	14.9	13.733	13.967	12.867	15.933	15.333	12.967	13.633	12	12.667	12.833	13.033	13.267	12.067	14.033	11.567	13.133	14.767	14.733	15.133	12.733	13.533	12.267	11.367	12.4	13.6	12.3	12.067	13.6
2013	7	15.5	15.633	15.6	15.867	15.733	15.733	15.5	15.033	14.767	13.933	14.767	16.2	14.933	15.433	14.667	14.367	13.067	13.933	13.833	14.667	13.233	12.9	11.6	15.5	15.033	13.567	14.4	12.667	13.3	13.4	13.233	13.133	11.6	13.3	10.533	11.8	13.3	14.567	15.167	13.5	14.5	13.1	12.067	13.167	13.967	12.333	11.767	12.933
2013	8	15.267	15.367	15.433	15.433	15.3	15.333	15.167	14.733	14.6	13.833	14.7	15.667	14.5	15.033	14.3	14.1	12.967	13.8	13.733	14.567	13.3	13.133	12.033	15	14.6	13.2	13.9	12.333	12.967	13.133	13.1	13.133	11.833	13.4	10.933	12.133	13.567	13.967	14.567	13.033	13.967	12.767	11.833	12.833	13.767	12.333	11.833	13.033
2014	3	14.467	14.1	14.333	13.367	13.167	13.067	14.033	13.7	13.6	13.133	13.967	12.267	12.5	13.9	13.2	12.067	11.267	11.833	12	12.9	12.233	11.967	12.5	12.733	11.1	11.367	11.7	10.4	10.8	10.067	10.267	10.5	9.9	11.6	10.033	12.633	13.867	11.7	11.867	9.933	10.4	9.433	8.767	9.5	10.367	9.633	9.6	10.967
2014	4	15.1	14.567	14.733	15	14.733	14.667	14.8	14.367	14.267	13.633	14.5	15.2	14.033	14.267	13.6	13.233	12.3	12.933	12.967	13.867	13.033	13.8	12.967	12.833	12.4	11.867	12.967	11.533	12.033	12.2	12.233	12.467	11.7	13.533	12.033	13.467	14.367	11.833	12.167	12.1	12.733	11.667	10.867	11.7	12.567	11.567	11.5	13.033
2014	5	14.367	14.267	14.567	14.033	13.733	13.633	13.933	13.567	13.5	13	14	13.9	13.133	13.4	12.7	12.067	11.167	11.9	12.067	12.967	12.233	12.7	12.2	12.367	11.633	10.833	11.7	10.4	10.833	10.767	10.9	11.267	10.567	12.467	10.867	12.633	13.767	11.333	11.533	10.567	11.133	10.033	9.333	10.167	11.1	10.333	10.367	11.867
2014	6	15.067	15.067	15.3	14.767	14.567	14.5	14.6	14.167	14.067	13.433	14.667	14.5	13.1	14.467	13.667	12.567	11.467	12.367	12.5	13.233	12.4	12.933	12.2	13.467	12.9	11.3	11.867	10.367	10.967	10.8	10.967	11.4	10.6	12.9	11.1	12.967	14.3	12.267	12.633	10.667	11.367	10.2	9.3	10.333	11.433	10.5	10.533	12.4
2014	7	15.5	15.6	15.6	15.9	15.733	15.767	15.5	15	14.8	13.967	14.8	13.7	12.5	15.533	14.733	14.433	13.2	14	13.933	13.3	11.933	11.8	10.4	13.533	13.2	11.667	12.467	10.933	11.633	11.8	11.8	11.867	10.467	12.133	9.567	10.667	13.3	12.5	13.1	11.533	12.6	11.367	10.467	11.567	12.533	11.067	10.6	11.833
2014	8	13.233	13.367	13.467	13.167	13	13.1	12.9	12.5	12.6	11.867	12.7	13.3	12.2	12.767	12.067	11.833	10.767	11.533	11.767	12.567	11.333	11.233	10.1	12.567	12.233	10.867	11.6	10.2	10.8	11.2	11.2	11.2	9.967	11.5	9.167	10.067	11.433	11.567	12.1	10.733	11.633	10.533	9.7	10.933	11.8	10.467	10.033	11.2
2015	3	13.858	13.513	13.658	13.032	10.252	13.794	13.684	13.51	13.458	13.261	14.652	13.058	12.487	12.71	12.213	12.245	11.619	11.89	12.616	13.877	12.439	13.081	11.684	11.674	12.374	11.023	11.471	10.365	11.306	11.477	11.655	11.823	9.784	13.287	9.232	12.035	14.268	8.887	10.868	10.665	11.361	10.623	10.665	11.235	12.719	10.232	9.552	12.184
2015	4	14.803	14.357	14.557	10.503	11.933	11.86	11.823	11.863	15.62	14.16	16.897	13.617	12.103	13.083	11.83	11.363	11.497	11.603	11.663	12.403	11.587	11.987	12.243	11.293	12.097	9.687	11.19	9.737	10.73	11.007	11.087	11.21	10.337	11.823	10.187	12.86	15.34	9.297	11.507	8.837	10.797	8.807	8.073	10.707	11.463	10.467	10.237	11.757
2015	5	15.242	14.726	14.913	12.784	9.326	11.594	11.616	11.932	14.71	14.319	15.135	15.239	14.5	15.032	12.977	12.213	13.103	11.752	12.671	12.429	12.652	12.358	12.965	13.329	14.21	12.026	13.055	11.716	12.635	12.81	12.855	12.81	12.623	12.906	12.406	13.165	16.084	10.658	13.032	11.458	12.774	11.326	11.177	12.774	12.961	12.71	12.613	13.145
2015	6	15.607	15.327	15.617	15.923	16.173	19.42	19.153	17.983	17.687	15.397	15.437	14.397	12.19	13.83	14.47	15.113	10.953	14.28	14.53	18.483	13.873	10.99	13.637	12.56	12.18	9.777	11.793	7.02	9.997	11.037	11.387	11.85	8.643	13.923	6.103	14.077	17.513	10.083	11.843	8.55	11.107	8.043	5.947	10.057	12.793	9.203	8.303	12.337
2015	7	14.635	14.729	15.045	8.016	6.884	6.445	6.461	7.29	14.045	13.652	14.645	14.419	13.642	13.777	10.939	9.213	12.997	10.684	10.542	7.91	11.042	9.294	12.942	12.932	13.923	12.497	13.165	11.748	12.377	12.929	12.742	12.445	15.819	10.332	16.484	13.374	16.719	11.065	13.835	12.31	13.165	12.103	11.777	14.045	11.345	15.2	16.245	13.452
2015	8	13.532	13.584	13.777	9.706	9.581	9.729	9.729	10.023	10.145	10.894	13.532	13.974	12.59	13.532	10.9	10.442	11.726	10.923	10.9	9.974	11.132	9.371	12.468	13.042	12.761	11.503	12.739	12.813	12.026	11.861	11.81	11.555	12.816	10.758	13.497	11.445	13.7	11.69	12.755	10.955	12.539	10.458	9.148	12.106	11.139	12.606	13.032	11.484
2016	3	14.287	15.761	16.026	15.581	9.871	14.142	14.319	14.223	14.168	15.835	15.877	15.765	15.01	15.229	12.077	14.071	13.29	13.5	15.51	17.265	15.181	17.771	14.123	14.519	14.906	13.352	13.81	13.374	13.587	13.377	13.339	14.41	11.252	16.11	10.332	14.416	18.135	12.845	14.816	13.094	13.726	13.016	12.839	13.452	15.648	12.048	10.981	14.49
2016	4	15.613	17.06	17.443	14.65	13.817	13.353	13.093	13.26	13.787	15.083	17.163	16.94	16.123	16.483	14.053	13.21	13.74	13.613	14.397	14.517	14.437	16.26	13.32	16.313	16.15	14.633	15.093	13.713	13.973	13.907	13.943	13.903	13.503	14.293	12.873	13.647	17.337	15.52	16.113	14.45	15.18	14.317	13.687	14.317	14.06	14.27	13.547	14.023
2016	5	16.732	17.042	17.41	16.858	16.59	16.435	16.123	15.881	15.203	16.748	17.377	16.71	16.19	16.255	15.29	15.061	14.306	15.155	15.965	17.297	16.09	18.5	14.51	16.323	16.126	14.832	14.965	14.471	14.526	14.452	14.577	15.481	13.358	16.99	12.297	15.845	18.584	15.858	16.048	14.739	15.006	14.532	14.013	14.277	16.329	13.858	13.2	15.894
2016	6	17.63	17.153	17.493	16.45	16.403	16.907	17.177	16.707	16.583	15.8	17.213	16.54	15.677	16.037	15.453	14.82	13.853	14.953	15.09	16.327	14.95	15.39	13.983	16.073	15.54	14.053	14.63	13.027	13.64	14.06	14.217	14.41	12.343	16.277	11.707	15	17.903	14.707	15.333	13.657	14.363	13.467	12.897	13.743	15.58	12.873	12.15	15.44
2016	7	16.048	15.974	16.094	16.458	17.394	17.687	17.474	16.897	16.032	15.139	16.642	16.094	14.965	15.894	15.013	15.948	13.897	15.287	15.323	16.59	14.887	15.048	13.59	14.7	14.874	13.571	14.826	12.313	13.458	14.29	14.371	14.468	12.668	15.106	11.732	13.445	15.581	13.09	14.181	12.297	14.039	12.306	12.048	13.777	15.129	13.174	12.565	14.368
2016	8	17.426	17.113	17.577	15.874	16.061	16.335	16.858	16.274	16.132	15.035	16.997	15.448	14.155	15.213	14.461	14.835	13.103	14.494	14.581	16.139	14.184	15.974	12.829	13.948	14.345	12.981	14.316	11.658	12.865	13.31	13.439	13.594	11.523	14.29	10.955	13.116	17.274	12.481	13.629	11.532	13.403	11.523	10.987	12.735	14.345	12.077	11.629	13.506
[truncated: 183 more columns]

## Sheet: Temperature Maximum
	Grid points	1	2	3	4	5	6	7	8	9	10	11	12	13	14	15	16	17	18	19	20	21	22	23	24	25	26	27	28	29	30	31	32	33	34	35	36	37	38	39	40	41	42	43	44	45	46	47	48
	Longitude	39.2062	39.2062	39.2062	39.2437	39.2437	39.2437	39.2437	39.2437	39.2437	39.2437	39.2437	39.2812	39.2812	39.2812	39.2812	39.2812	39.2812	39.2812	39.2812	39.2812	39.2812	39.2812	39.2812	39.3188	39.3188	39.3188	39.3188	39.3188	39.3188	39.3188	39.3188	39.3188	39.3188	39.3188	39.3188	39.3188	39.3188	39.3563	39.3563	39.3563	39.3563	39.3563	39.3563	39.3563	39.3563	39.3563	39.3563	39.3563
	Latitude	12.5813	12.6188	12.6562	12.3938	12.4313	12.4688	12.5062	12.5437	12.5813	12.6188	12.6562	12.3187	12.3562	12.3938	12.4313	12.4688	12.5062	12.5437	12.5813	12.6188	12.6562	12.7312	12.7688	12.3187	12.3562	12.3938	12.4313	12.4688	12.5062	12.5437	12.5813	12.6188	12.6562	12.6937	12.7312	12.7688	12.8063	12.3187	12.3562	12.3938	12.4313	12.4688	12.5062	12.5437	12.5813	12.6188	12.6562	12.6937
YEAR	MONTH
1983	3	28.367	28.167	28.467	27.767	27.833	27.9	27.7	27.267	27.2	26.067	27.533	27.133	25.667	27	26.233	25.833	24.4	25.567	25.633	27	24.733	25.467	24.067	26.1	25.567	24.433	25.333	23	23.867	24.2	24.433	24.733	22.433	25.1	22.1	24.133	26.2	24.8	24.767	23	24.767	23.2	22.1	23.5	24.867	23.267	22.133	24.1
1983	4	28.8	28.8	29.067	28.467	28.4	28.5	28.267	27.8	27.667	26.667	28.1	27.867	26.467	27.8	26.933	26.7	25.2	26.267	26.333	27.633	25.4	26.033	24.567	26.9	26.467	25.433	26.3	23.967	24.767	25.067	25.233	25.4	23.167	25.7	22.667	24.633	26.567	25.733	25.8	24.067	25.8	24.2	23.067	24.4	25.667	24.033	22.833	24.7
1983	5	27.267	27.333	27.467	27.233	27.033	27.1	26.9	26.5	26.4	25.6	26.633	27.2	26	26.767	25.967	25.9	24.7	25.5	25.5	26.467	25	25.133	23.867	26.533	26.067	25.067	25.7	23.967	24.567	24.667	24.667	24.7	23.2	25.1	22.567	24.033	25.433	25.767	25.7	24.567	25.633	24.233	23.2	24.2	25.133	23.633	23.067	24.433
1983	6	29.133	30.333	30.333	28.9	28.8	28.933	28.833	28.433	28.433	27.667	28.733	28.9	27.533	28.467	27.7	27.333	26.2	27.267	27.3	28.367	27.033	26.967	25.6	28.133	27.667	26.233	27.1	25.533	26.267	26.5	26.533	26.667	25.267	27.233	24.5	25.967	27.267	27.3	26.9	26.3	27.267	25.933	24.9	26.067	27.133	25.567	25.133	26.633
1983	7	28.767	30.467	30.5	28.533	28.433	28.6	28.5	28.1	28.033	27.1	28.433	28.833	27.267	28.167	27.267	27.567	26.067	27.267	27.3	28.467	26.733	26.533	24.567	28.1	27.567	26.367	27.333	25.333	26.2	26.367	26.367	26.433	24.7	26.967	23.6	25.267	26.5	27.267	27.533	26.433	27.567	25.867	24.6	25.933	27.167	25.267	24.6	26.233
1983	8	25.567	26.6	26.6	25.567	25.467	25.567	25.4	24.933	24.867	23.9	25.067	25.967	24.467	25.233	24.333	24.567	23.067	24.167	24.133	25.2	23.433	23.133	21.433	25.267	24.8	23.5	24.4	22.467	23.233	23.4	23.3	23.267	21.5	23.6	20.267	21.867	23.3	24.533	24.733	23.533	24.7	23	21.767	23	24.167	22.167	21.5	23
1984	3	29.3	29.4	29.933	28.8	28.9	28.933	28.733	28.267	28.133	27.333	28.733	28.767	27.433	28.067	27.367	26.9	25.5	26.533	26.6	27.933	26.567	27.5	26.533	27.767	27.333	25.567	26.433	24.233	25.033	25.333	25.533	25.767	24.333	26.933	24.033	26.267	28.567	26.5	26.5	24.833	25.933	24.467	23.333	24.633	25.933	24.4	24	25.967
1984	4	28.633	28.833	29.033	28.633	28.533	28.5	28.267	27.833	27.633	27	28.1	28.867	27.733	28	27.3	26.9	25.7	26.4	26.433	27.433	26.333	26.867	26.4	28.067	27.6	26	26.6	24.667	25.267	25.4	25.467	25.633	24.5	26.533	24.233	25.867	28	27.067	26.933	25.367	26.167	24.833	23.833	24.833	25.767	24.5	24.2	25.733
1984	5	26.033	26.233	26.4	26.167	25.933	25.933	25.733	25.267	25.167	24.433	25.467	26.1	24.9	25.667	24.833	24.733	23.5	24.233	24.2	25.1	23.933	24.167	23.067	25.367	24.933	23.933	24.5	22.8	23.3	23.367	23.333	23.433	22.2	24.033	21.733	23.2	24.633	24.633	24.5	23.667	24.4	23	22	22.867	23.733	22.367	21.967	23.367
1984	6	28.267	29.3	29.433	27.833	27.8	27.967	27.833	27.4	27.4	26.467	27.833	27.767	26.233	27.3	26.467	26.267	24.833	26.133	26.233	27.5	25.833	25.867	24.533	26.867	26.367	24.833	25.9	24.167	25.033	25.267	25.267	25.433	23.733	26.167	22.9	24.767	26.5	25.833	25.633	25.067	26.3	24.633	23.4	24.767	26.033	24.167	23.6	25.433
1984	7	27.333	28.867	28.933	27.033	26.933	27.133	27	26.633	26.6	25.667	26.933	27.4	25.833	26.667	25.767	26.1	24.567	25.8	25.8	27.033	25.3	25.133	23.333	26.633	26.133	24.867	25.833	23.933	24.767	24.967	24.933	24.967	23.167	25.567	22.133	23.867	25.267	25.767	26.1	24.933	26.133	24.433	23.1	24.467	25.733	23.767	23.133	24.833
1984	8	27.133	28.167	28.2	27.3	27.133	27.2	27	26.433	26.3	25.267	26.533	27.8	26.2	26.867	25.867	26.067	24.4	25.533	25.5	26.6	24.733	24.5	22.7	27.033	26.467	24.967	25.9	23.667	24.467	24.633	24.533	24.5	22.633	24.9	21.333	23.1	24.8	26.2	26.4	24.9	26.067	24.2	22.833	24.2	25.433	23.3	22.567	24.233
1985	3	27.9	28	28.267	27.667	27.7	27.667	27.433	26.933	26.767	26	27.3	27.8	26.467	26.933	26.267	25.733	24.367	25.267	25.333	26.567	25.3	25.967	24.667	26.8	26.4	24.533	25.333	23.167	23.9	24.133	24.267	24.467	23.167	25.567	22.9	24.767	26.533	25.633	25.567	23.967	24.833	23.4	22.267	23.467	24.667	23.167	22.833	24.633
1985	4	26.467	26.6	26.833	26.133	26.1	26.167	26	25.7	25.633	25	26.067	26.2	25.067	25.6	24.967	24.767	23.633	24.5	24.533	25.567	24.467	24.867	23.667	25.433	25.067	23.767	24.4	22.7	23.367	23.567	23.667	23.867	22.7	24.733	22.367	23.867	25.233	24.533	24.5	23.3	24.167	22.933	22.033	23.067	24.067	22.767	22.467	23.967
1985	5	26.267	26.467	26.6	26.167	26	26.1	25.933	25.633	25.567	24.867	25.9	26	24.8	25.767	25.033	25.067	23.867	24.767	24.767	25.7	24.467	24.533	23.467	25.4	24.933	24.133	24.833	23.267	23.833	23.967	24	24.067	22.8	24.6	22.2	23.567	24.933	24.667	24.6	23.7	24.9	23.567	22.533	23.533	24.467	23.1	22.633	23.967
1985	6	29.667	30.733	30.8	29.367	29.3	29.4	29.3	28.867	28.833	27.967	29.2	29.633	28.167	28.933	28.067	27.767	26.467	27.6	27.633	28.867	27.333	27.267	25.633	28.8	28.267	26.567	27.467	25.8	26.6	26.8	26.8	26.933	25.333	27.567	24.467	26.167	27.4	27.9	27.6	26.567	27.8	26.233	25.067	26.333	27.5	25.8	25.267	26.867
1985	7	26.833	28.4	28.433	26.6	26.5	26.667	26.567	26.167	26.133	25.233	26.5	26.8	25.333	26.233	25.333	25.633	24.2	25.367	25.4	26.567	24.9	24.733	23.467	26.133	25.6	24.467	25.4	23.5	24.333	24.533	24.5	24.567	22.867	25.1	21.8	23.467	25.333	25.267	25.533	24.5	25.633	23.967	22.767	24.067	25.3	23.4	22.8	24.433
1985	8	25.933	27	27	25.867	25.767	25.9	25.767	25.267	25.233	24.267	25.433	26.167	24.7	25.533	24.6	24.867	23.367	24.533	24.5	25.6	23.867	23.467	21.9	25.5	25	23.7	24.7	22.733	23.533	23.767	23.667	23.633	21.833	24	20.633	22.2	23.8	24.767	24.933	23.733	24.933	23.3	22	23.333	24.5	22.533	21.833	23.367
1986	3	28.533	28.567	28.867	28.2	28.267	28.267	28	27.5	27.3	26.467	27.867	28.2	26.8	27.433	26.7	26.2	24.733	25.7	25.767	27.067	25.667	26.367	25.033	27.167	26.733	24.933	25.767	23.367	24.133	24.433	24.6	24.833	23.367	26	23.033	25.067	27.1	25.9	25.9	24.067	25.133	23.6	22.433	23.733	25.067	23.433	23.033	25.033
1986	4	27.233	27.367	27.633	26.9	26.867	26.967	26.767	26.333	26.233	25.433	26.8	27	25.633	26.267	25.467	25.3	23.933	24.933	25.033	26.233	24.867	25.3	24.167	26.1	25.633	24.1	24.9	22.833	23.567	23.833	23.967	24.167	22.733	25.133	22.233	24.067	26.067	24.967	25.067	23.567	24.567	23.033	21.933	23.2	24.433	22.833	22.433	24.267
1986	5	28.1	28.267	28.4	28.233	28	28	27.767	27.3	27.1	26.333	27.433	28.467	27.167	27.667	26.767	26.733	25.4	26.167	26.133	27.1	25.733	25.967	24.633	27.7	27.233	25.8	26.467	24.5	25.067	25.167	25.167	25.233	23.833	25.833	23.2	24.8	26.267	26.9	26.8	25.367	26.2	24.767	23.6	24.667	25.633	24.1	23.633	25.1
1986	6	28.533	29.567	29.6	28.3	28.167	28.333	28.167	27.8	27.767	26.933	28.1	28.6	27.2	27.8	26.967	26.733	25.433	26.6	26.633	27.767	26.267	26.233	24.667	27.833	27.3	25.533	26.467	24.8	25.567	25.8	25.8	25.9	24.367	26.533	23.567	25.2	26.433	27.167	26.833	25.9	26.933	25.433	24.1	25.333	26.5	24.8	24.267	25.867
1986	7	25.933	27.467	27.5	25.633	25.567	25.733	25.633	25.267	25.2	24.333	25.567	26.033	24.633	25.3	24.433	24.733	23.333	24.467	24.5	25.667	24.033	23.8	22.1	25.367	24.9	23.567	24.533	22.733	23.533	23.7	23.667	23.733	22.067	24.267	21.067	22.667	23.967	24.867	25.133	24.033	25.133	23.5	21.967	23.267	24.433	22.6	22	23.6
1986	8	24.1	25.167	25.133	24.1	24	24.1	23.933	23.5	23.433	22.5	23.6	24.533	23.133	23.8	22.9	23.167	21.733	22.767	22.7	23.733	22.1	21.8	20.167	23.9	23.4	22.1	22.967	21.167	21.867	22.033	21.933	21.9	20.2	22.233	19.067	20.567	21.933	23.367	23.5	22.4	23.467	21.867	20.467	21.667	22.733	20.9	20.233	21.667
1987	3	27.333	27.367	27.667	26.767	26.833	26.933	26.733	26.3	26.167	25.433	26.833	26.833	25.4	26.067	25.333	24.967	23.567	24.667	24.767	26.067	24.733	25.367	23.9	25.867	25.367	23.633	24.567	22.267	23.167	23.467	23.667	23.9	22.467	25.067	22	24	25.933	23.933	23.967	22.3	24.1	22.567	21.433	22.8	24.1	22.5	22.133	24.067
1987	4	27.867	28	28.267	28.167	28.1	27.533	27.367	26.933	26.833	26.1	27.4	28.333	26.933	27.5	26.1	25.867	24.533	25.567	25.633	26.833	25.5	25.967	24.533	27.433	26.933	25.367	25.5	23.4	24.2	24.433	24.6	24.8	23.367	25.8	22.867	24.7	26.433	25.4	25.467	23.9	25.167	23.667	22.567	23.8	25.033	23.5	23.1	24.9
1987	5	26.133	26.333	26.433	26.433	26.233	26.033	25.833	25.4	25.3	24.6	25.567	26.667	25.533	25.933	24.967	24.867	23.7	24.467	24.433	25.267	24.067	24.3	23.167	25.967	25.567	24.267	24.667	23	23.5	23.6	23.6	23.633	22.4	24.2	21.833	23.233	24.633	25.267	25.2	24.067	24.733	23.4	22.233	23.133	24	22.633	22.2	23.533
1987	6	28.933	30.033	30.033	28.733	28.667	28.733	28.6	28.167	28.167	27.367	28.433	29.133	27.8	28.3	27.567	27.167	25.967	27	27.033	28.133	26.733	26.667	25.133	28.467	27.933	26.167	26.933	25.4	26.1	26.3	26.3	26.4	24.933	26.967	24.2	25.667	26.833	27.667	27.267	26.333	27.3	25.867	24.733	25.9	26.933	25.3	24.867	26.333
1987	7	28.2	29.933	29.867	27.9	27.833	28.033	27.933	27.567	27.567	26.733	27.867	28.267	26.9	27.6	26.8	27.067	25.8	26.9	26.9	27.967	26.433	26.2	24.6	27.667	27.2	26	26.9	25.2	25.933	26.133	26.1	26.133	24.533	26.6	23.567	25.1	26.367	27	27.267	26.267	27.3	25.733	24.5	25.733	26.833	25.067	24.467	26
1987	8	24.933	26.033	26.033	24.967	24.833	24.967	24.8	24.333	24.233	23.333	24.4	25.4	24.033	24.633	23.767	24	22.567	23.6	23.567	24.567	22.933	22.6	21	24.733	24.267	22.967	23.867	22	22.733	22.867	22.8	22.767	21.033	23.033	19.9	21.367	22.8	24.133	24.233	23.1	24.133	22.567	21.3	22.533	23.533	21.733	21.033	22.467
1988	3	28.833	28.867	29.167	29	29	28.967	28.733	28.067	27.8	27.033	28.167	29.033	27.7	28.267	27.5	26.967	25.533	26.3	26.3	27.533	26.233	27	25.8	28.033	27.567	25.833	26.533	24.267	24.8	25.067	25.2	25.4	24.033	26.533	23.8	25.733	27.733	26.833	26.733	24.967	25.933	24.4	23.2	24.367	25.533	24.067	23.733	25.567
1988	4	29.433	29.567	29.833	29.233	29.133	29.233	29	28.467	28.233	27.433	28.8	29.233	27.833	28.5	27.7	27.433	25.933	26.833	26.9	28.1	26.667	27.367	26.067	28.233	27.733	26.133	27.067	24.633	25.367	25.6	25.733	25.9	24.467	26.933	24.067	25.967	28.067	27.2	27.3	25.433	26.467	24.9	23.667	24.967	26.167	24.567	24.133	25.967
1988	5	28.8	28.967	29.133	29.033	28.833	28.833	28.6	27.767	27.633	26.867	28.133	29.2	27.933	28.467	27.6	27.5	26.2	26.667	26.6	27.567	26.2	26.5	25.3	28.367	27.967	26.567	27.267	25.333	25.567	25.667	25.667	25.733	24.3	26.333	23.7	25.367	27	27.533	27.533	26.167	27.033	25.6	24.1	25.167	26.133	24.6	24.133	25.6
1988	6	29.067	30.2	30.267	29.067	29	28.833	28.733	28.267	28.233	27.367	28.6	29.467	27.967	28.6	27.5	27.2	25.8	27	27.067	28.233	26.7	26.7	25.033	28.633	28.067	26.167	26.867	25.167	25.933	26.167	26.167	26.267	24.667	26.933	23.867	25.567	26.867	27.333	27	26	27.167	25.6	24.4	25.667	26.867	25.1	24.567	26.267
1988	7	24.433	26	26.033	23.9	23.833	23.8	23.733	23.3	23.333	22.467	24.167	24.4	22.867	23.567	22.467	22.767	21.333	22.533	22.6	23.8	22.133	21.933	20.133	23.7	23.167	21.833	22.533	20.733	21.533	21.767	21.7	21.8	20.1	22.4	19.033	20.733	22.033	22.467	22.767	21.7	22.933	21.233	19.967	21.3	22.567	20.633	20	21.667
1988	8	23.367	24.4	24.4	23.2	23.1	23.2	23.033	23.167	23.1	22.167	22.9	23.667	22.233	22.9	22.033	22.233	20.833	22.433	22.4	23.467	21.8	21.467	19.8	23	22.533	21.167	22.1	20.233	21.533	21.667	21.633	21.6	19.867	21.933	18.7	20.267	21.633	22.3	22.467	21.3	22.4	20.767	20.067	21.267	22.433	20.533	19.867	21.367
1989	3	26.7	26.833	27.133	26.3	26.367	26.367	26.2	25.7	25.6	24.8	26.233	26.333	24.933	25.6	24.867	24.467	23.067	24.1	24.167	25.867	24.5	25.133	23.767	25.4	24.933	23.633	24.467	22.233	23.033	23.333	23.5	23.733	22.3	24.833	21.9	23.867	25.733	24.567	24.6	22.9	24	22.467	21.367	22.667	23.967	22.367	21.967	23.9
1989	4	26.833	27.267	27.5	26.367	26.333	26.467	26.267	25.8	25.733	24.9	26.333	26.433	24.967	25.7	24.867	24.733	23.233	24.367	24.467	25.733	24.233	24.767	23.2	25.467	25	23.333	24.267	21.933	22.8	23.1	23.3	23.467	21.867	24.533	21.3	23.3	25.233	24.167	24.4	22.667	23.867	22.233	21.067	22.433	23.8	22.067	21.633	23.533
1989	5	27.133	27.367	27.5	27.9	27.633	27.633	27.367	26.867	26.667	25.933	26.467	28.1	26.9	27.333	26.433	26.333	25	25.7	25.633	26.567	25.267	25.7	24.567	27.333	26.9	25.5	26.1	24.167	24.667	24.733	24.7	24.7	23.4	25.367	22.9	24.533	26.2	26.5	26.467	25.033	25.833	24.4	23.267	24.233	25.133	23.633	23.167	24.633
1989	6	29.3	30.4	30.4	29.133	29	29.133	28.933	28.467	28.467	27.6	28.8	29.6	28.067	28.667	27.8	27.433	26.033	27.233	27.267	28.4	26.867	26.867	25.267	28.767	28.2	26.267	27.133	25.4	26.167	26.4	26.367	26.467	24.9	27.1	24.067	25.8	27.1	27.833	27.433	26.4	27.433	25.8	24.667	25.9	27.067	25.3	24.733	26.433
1989	7	26.567	28.233	28.2	25.7	25.633	25.767	25.667	25.267	25.367	24.467	26.2	26.233	24.7	25.367	24.533	24.8	23.4	24.633	24.633	25.767	24.133	23.9	22.2	25.567	25	23.667	24.6	22.8	23.6	23.8	23.767	23.833	22.1	24.367	21.1	22.833	24.1	24.733	24.967	23.9	25	23.333	22.1	23.367	24.533	22.667	22.067	23.667
1989	8	25.433	26.567	26.533	25.3	25.233	25.333	25.233	24.8	24.767	23.867	24.967	25.9	24.567	25	24.2	24.433	23.067	24.167	24.1	25.1	23.467	23.133	21.6	25.267	24.867	23.6	24.5	22.767	23.267	23.467	23.333	23.333	21.667	23.6	20.467	21.967	23.367	24.567	24.8	23.767	24.867	23.333	22.167	23.3	24.133	22.333	21.7	23.033
1990	4	28.167	28.2	28.5	27.867	27.833	27.867	27.633	27.1	26.933	26.067	27.467	28.4	27	27.1	26.267	26.033	24.5	25.467	25.533	26.833	25.367	26.033	24.633	27.333	26.9	25.3	25.6	23.167	23.967	24.233	24.367	24.533	23.033	25.667	22.667	24.633	26.7	26.067	26.267	24.433	25.567	23.933	22.2	23.567	24.833	23.133	22.733	24.667
1990	5	30.133	30.333	30.5	30.267	29.7	29.733	29.633	29.267	29.1	28.3	29.433	30.333	29.033	29.633	28.367	28.367	26.867	28.067	28	29.033	27.6	27.967	26.7	29.533	29.1	27.633	28.367	25.9	26.6	26.7	26.7	27.067	25.533	27.733	24.933	26.667	28.533	28.633	28.633	27.067	28.033	26.2	25	26.133	27.2	26.033	25.333	26.933
1990	6	29.833	31	31.067	29.367	29.467	29.567	29.4	29	28.967	28	29.333	29.833	28.2	28.867	28.133	27.767	26.333	27.667	27.7	28.933	27.3	27.267	25.533	28.933	28.333	26.333	27.3	25.633	26.467	26.667	26.667	26.9	25.2	27.567	24.367	26.167	27.567	27.9	27.567	26.5	27.633	26.1	24.833	26.133	27.367	25.4	25.033	26.833
1990	7	25.5	26.767	26.767	25.933	25.9	25.3	25.233	24.833	24.833	23.867	25.133	26.4	24.933	25.633	24.8	25.067	23.7	24.133	24.133	25.233	23.567	23.367	21.4	25.733	25.233	23.9	24.867	23.067	23.9	24.1	24.033	23.233	21.567	23.833	20.533	22.233	23.533	24.9	25.167	24.167	25.267	23.6	22.333	23.633	24.8	22.933	21.5	23.1
1990	8	25.033	25.867	25.833	26	25.833	25.1	24.933	24.4	24.3	23.167	24.367	26.567	25	25.667	24.667	24.867	23.333	23.6	23.533	24.5	22.733	22.4	20.533	25.9	25.3	23.833	24.733	22.7	23.467	23.6	23.5	22.533	20.7	22.867	19.433	21.1	22.567	25.133	25.233	23.867	25	23.233	21.9	23.167	24.367	22.367	20.667	22.267
1991	3	28.667	28.733	29.033	29.033	28.6	28.633	28.033	27.567	27.467	26.6	28.067	28.967	27.567	28.267	27.067	26.6	25.133	26.2	25.867	27.2	25.8	26.567	25.167	27.933	27.467	25.733	26.6	23.7	24.567	24.9	25.1	25.333	23.5	26.133	23.133	25.167	27.3	26.633	26.667	24.833	26	23.967	22.833	24.2	25.533	23.9	23.5	25.5
1991	4	27.9	28.067	28.3	29	28.667	28.7	27.433	26.967	26.867	26.167	27.333	29	27.833	28.367	27.367	27.033	25.8	26.6	25.6	26.667	25.5	26.133	25.1	28.133	27.733	26.267	26.967	24.767	25.4	25.567	25.667	25.8	23.567	25.733	23.367	25.067	26.8	27.1	27.1	25.667	26.567	24.933	23.933	25	26.033	24.633	24.333	25.933
1991	5	27.5	27.767	27.867	27.7	27.467	27.467	27.2	26.767	26.567	25.867	26.8	27.833	26.733	27.167	26.333	26.2	25.033	25.7	25.6	26.5	25.267	25.567	24.533	27.133	26.733	25.433	26.033	24.233	24.767	24.833	24.8	24.833	23.567	25.333	23.033	24.467	26.067	26.433	26.3	25.1	25.833	24.467	23.433	24.3	25.167	23.8	23.333	24.7
1991	6	28.867	30.033	30.067	28.833	28.7	28.8	28.633	28.167	28.1	27.233	28.4	29.167	27.767	28.367	27.5	27.1	25.8	26.9	26.933	28	26.533	26.533	24.933	28.6	27.833	25.933	26.833	25.167	25.933	26.1	26.067	26.167	24.6	26.767	23.833	25.5	26.733	27.567	27.2	26.3	27.167	25.6	24.433	25.633	26.733	25	24.5	26.1
1991	7	26.2	27.733	27.767	25.8	25.767	25.933	25.833	25.433	25.433	24.533	25.8	26.133	24.7	25.433	24.6	24.9	23.467	24.667	24.733	25.867	24.2	24.033	22.267	25.5	24.967	23.633	24.667	22.7	23.6	23.833	23.833	23.9	22.167	24.433	21.067	22.767	24.2	24.733	25.067	23.8	24.833	23.2	22	23.333	24.567	22.7	22.1	23.7
1991	8	24.033	25.067	25.067	24.033	23.933	24.033	23.833	23.367	23.3	22.333	23.5	24.4	22.967	23.7	22.767	23	21.533	22.6	22.533	23.667	21.9	21.6	19.967	23.733	23.233	21.867	22.8	20.867	21.667	21.767	21.733	21.733	19.933	22.067	18.767	20.4	21.867	22.933	23.167	21.9	23.067	21.367	20.133	21.367	22.567	20.6	19.9	21.467
1992	3	28.533	28.6	28.9	28.567	28.633	28.667	28.367	27.533	27.333	26.5	27.9	28.5	27.133	27.767	27.1	26.633	25.2	25.767	25.8	27.333	25.967	26.733	25.433	27.433	27	25.3	26.133	23.8	24.6	24.767	24.933	25.133	23.733	26.3	23.433	25.4	27.4	26.167	26.233	24.433	25.5	24	22.833	24.033	25.233	23.8	23.4	25.267
1992	4	28.333	28.5	28.767	28.167	28.133	28.233	28.033	27.4	27.233	26.5	27.767	28.167	26.867	27.5	26.8	26.533	25.2	25.933	25.967	27.133	25.867	26.433	25.133	27.233	26.833	25.267	26.167	24.033	24.767	25	24.9	25.1	23.667	26.1	23.367	25.233	27.033	26.2	26.2	24.733	25.7	24.233	23.167	24.333	25.3	23.833	23.4	25.2
1992	5	27.6	27.8	27.933	27.767	27.567	27.6	27.4	26.767	26.633	25.8	26.9	27.867	26.633	27.2	26.3	26.267	24.9	25.6	25.567	26.567	25.2	25.533	24.233	27.033	26.667	25.267	25.967	24.033	24.667	24.767	24.6	24.633	23.2	25.267	22.6	24.3	26	26.167	26.233	24.9	25.8	24.3	23.133	24.233	25.033	23.467	23	24.533
1992	6	29.733	30.867	30.967	29.067	28.933	29.1	28.867	28.867	28.8	27.9	29.167	29.467	27.867	28.567	27.6	27.233	25.733	27.5	27.5	28.767	27.133	27.167	25.5	28.567	28	26	26.967	25.033	25.867	26.067	26.5	26.633	24.967	27.4	24.133	26.033	27.5	27.5	27.2	26.1	27.2	25.533	24.233	25.533	27.3	25.367	24.8	26.6
1992	7	26.6	28.2	28.267	26.033	26	26.2	26.1	25.733	25.733	24.733	26.233	26.467	24.767	25.6	24.633	25.033	23.4	24.9	24.9	26.3	24.367	24.2	22.2	25.6	25.067	23.567	24.733	22.667	23.6	23.867	23.9	24	22	24.667	20.933	22.9	24.4	24.567	25	23.767	25.167	23.2	21.8	23.333	24.8	22.633	21.9	23.867
1992	8	23.2	24.233	24.233	23.133	23.067	23.233	23.067	22.533	22.5	21.533	22.7	23.533	22.1	22.8	21.933	22.2	20.767	21.767	21.733	22.833	21.133	20.867	19.2	22.833	22.333	21.067	22.033	20.133	20.933	21.133	20.933	20.933	19.133	21.3	18	19.6	21.067	22.067	22.3	21.133	22.3	20.7	19.467	20.733	21.733	19.867	19.167	20.667
1993	3	27.1	27.133	27.433	26.833	26.9	26.9	26.7	26	25.867	24.967	26.467	26.7	25.3	26.033	25.3	24.867	23.333	24.167	24.267	25.6	24.233	24.967	23.6	25.633	25.2	23.467	24.367	21.967	22.833	23.133	23.1	23.3	21.833	24.533	21.533	23.633	25.7	24.3	24.4	22.6	23.767	22.233	21.067	22.433	23.567	21.867	21.533	23.533
1993	4	25.633	25.733	25.967	24.933	24.9	25.033	24.9	24.7	24.7	23.9	25.267	25.067	23.733	24.367	23.633	23.467	22.2	23.433	23.533	24.767	23.367	23.8	22.3	24.2	23.767	22.233	23.133	21.167	21.933	22.233	22.533	22.733	21.333	23.733	20.833	22.633	24.2	23.133	23.233	21.867	22.9	21.4	20.367	21.633	23.033	21.467	21.1	22.867
1993	5	25.8	25.967	26.1	26.167	25.9	25.9	25.7	25.033	24.933	24.167	25.2	26.333	25.167	25.6	24.767	24.733	23.467	24	23.967	24.867	23.6	23.9	22.733	25.633	25.2	23.867	24.5	22.667	23.267	23.333	23.133	23.133	21.867	23.733	21.267	22.767	24.3	24.867	24.833	23.533	24.333	22.933	21.9	22.833	23.533	22.1	21.667	23.067
1993	6	28.467	29.567	29.633	28.067	28	28.2	28.1	27.633	27.633	26.7	27.967	28.433	26.933	27.6	26.8	26.533	25.1	26.367	26.4	27.633	26.033	26.033	24.367	27.6	27.067	25.2	26.2	24.5	25.267	25.533	25.5	25.633	23.967	26.3	23.133	24.933	26.233	26.833	26.333	25.467	26.567	24.933	23.733	25	26.233	24.367	23.833	25.567
1993	7	26.2	27.767	27.767	25.9	25.8	25.967	25.833	25.4	25.4	24.467	25.833	26.333	24.767	25.5	24.533	24.867	23.333	24.6	24.633	25.933	24.133	23.9	22	25.567	25.067	23.633	24.633	22.6	23.533	23.733	23.667	23.767	21.9	24.367	20.867	22.633	24.033	24.733	25	23.767	24.967	23.167	21.833	23.233	24.567	22.5	21.867	23.633
1993	8	25.867	26.9	26.9	25.667	25.633	25.8	25.633	25.133	25	23.967	25.3	26.1	24.5	25.267	24.367	24.667	23.067	24.267	24.233	25.433	23.567	23.267	21.467	25.267	24.8	23.3	24.433	22.333	23.167	23.4	23.267	23.3	21.333	23.7	20.133	21.933	23.533	24.467	24.7	23.433	24.733	22.933	21.533	22.967	24.167	22.067	21.333	23.033
1994	3	27.8	27.867	28.167	27.533	27.567	27.6	27.367	26.8	26.633	25.9	27.333	27.367	26.133	26.767	26.067	25.6	24.2	25.1	25.2	26.4	25.233	26.233	24.967	26.367	25.967	24.333	25.133	22.933	23.733	23.967	24.1	24.433	23.1	25.533	23.033	24.967	27	25.1	25.233	23.5	24.6	23.133	22.033	23.333	24.633	23.067	22.733	24.6
1994	4	28.6	28.767	29.033	28.5	28.4	28.433	28.167	27.7	27.5	26.7	28	28.533	27.2	27.8	26.967	26.667	25.233	26.1	26.167	27.333	26	26.767	25.5	27.567	27.133	25.533	26.3	24.067	24.8	24.967	25.067	25.2	23.8	26.233	23.633	25.567	27.433	26.7	26.467	24.867	25.867	24.3	23.133	24.3	25.5	23.867	23.5	25.3
1994	5	28.633	28.867	29	28.833	28.567	28.633	28.4	27.967	27.833	27.067	28.067	29.3	28.067	28.333	27.467	27.367	26.133	26.9	26.9	27.833	26.5	26.567	25.3	28.6	28.133	26.567	27.2	25.4	26	26.1	26.033	26.067	24.733	26.633	24.067	25.533	26.867	27.833	27.733	26.3	27.1	25.667	24.6	25.6	26.5	24.967	24.533	25.933
1994	6	29.1	30.167	30.233	28.667	28.633	28.8	28.7	28.233	28.267	27.3	28.667	29.3	27.733	28.167	27.333	27.067	25.633	26.967	27.033	28.333	26.633	26.567	24.733	28.433	27.867	25.7	26.767	25.033	25.9	26.133	26.067	26.2	24.467	26.967	23.6	25.467	26.767	27.4	27.167	26.067	27.267	25.567	24.233	25.6	26.867	24.933	24.367	26.167
1994	7	25.067	26.533	26.567	24.667	24.6	24.767	24.667	24.267	24.267	23.3	24.7	25.1	23.467	24.267	23.3	23.667	22.1	23.433	23.433	24.733	22.933	22.8	20.933	24.267	23.733	22.333	23.367	21.367	22.267	22.5	22.433	22.567	20.667	23.2	19.667	21.533	22.967	23.3	23.667	22.467	23.733	21.9	20.533	21.967	23.333	21.233	20.633	22.467
1994	8	24.2	25.2	25.2	24.1	24.067	24.2	24.067	23.5	23.433	22.5	23.667	24.433	23.033	23.767	22.9	23.167	21.7	22.767	22.7	23.8	22.1	21.833	20.167	23.7	23.3	22	22.967	21.033	21.8	22.033	21.833	21.867	20.1	22.267	18.933	20.533	22.067	22.933	23.233	21.967	23.2	21.533	20.3	21.567	22.7	20.767	20.067	21.633
1995	3	28.133	28.167	28.467	27.867	27.867	27.867	27.567	27.067	26.9	26.067	27.5	27.833	26.433	27.067	26.3	25.8	24.3	25.3	25.367	26.633	25.267	26.033	24.667	26.8	26.333	24.533	25.333	22.933	23.733	24	24.233	24.433	23	25.6	22.667	24.667	26.733	25.533	25.533	23.667	24.733	23.167	22.033	23.367	24.6	23	22.6	24.6
1995	4	27.867	27.967	28.267	27.833	27.833	27.867	27.7	26.867	26.733	25.933	27.333	27.7	26.4	27.133	26.333	26.133	24.667	25.3	25.4	26.667	25.267	25.867	24.5	26.7	26.333	24.767	25.667	23.367	24.2	24.467	24.3	24.467	23	25.533	22.533	24.533	26.5	25.5	25.733	24	25.167	23.633	22.467	23.8	24.733	23.1	22.667	24.567
1995	5	27.733	27.933	28.067	27.867	27.633	27.667	27.467	26.9	26.733	25.9	27.1	27.967	26.667	27.233	26.333	26.333	24.9	25.733	25.667	26.8	25.333	25.6	24.2	27.167	26.7	25.267	26.033	24	24.667	24.8	24.667	24.8	23.233	25.433	22.6	24.367	26.033	26.2	26.267	24.867	25.867	24.3	23.1	24.2	25.233	23.533	23.033	24.667
1995	6	30.533	31.733	31.767	30.033	29.933	30.033	29.867	29.667	29.633	28.7	29.967	30.367	28.867	29.5	28.633	28.233	26.833	28.267	28.333	29.5	27.933	28	26.433	29.467	28.967	27	27.9	26.033	26.9	27.1	27.4	27.5	25.8	28.167	25.033	26.867	28.333	28.467	28.133	27	28.133	26.5	25.3	26.6	28.1	26.267	25.733	27.4
1995	7	26.667	28.233	28.267	25.9	25.867	26.067	25.967	25.867	25.9	24.9	26.333	26.3	24.7	25.5	24.6	24.967	23.367	25	25.1	26.367	24.533	24.433	22.5	25.5	25	23.567	24.667	22.667	23.6	23.8	24.1	24.2	22.3	24.833	21.233	23.133	24.6	24.533	24.967	23.767	25.067	23.233	21.867	23.3	24.967	22.867	22.2	24.067
1995	8	25.033	26.133	26.1	24.6	24.5	24.6	24.4	24.367	24.233	23.3	24.467	25.033	23.533	24.233	23.333	23.533	22.033	23.533	23.5	24.567	22.833	22.567	20.867	24.333	23.8	22.4	23.367	21.233	22.067	22.267	22.6	22.567	20.767	22.967	19.6	21.233	22.833	23.533	23.7	22.3	23.467	21.833	20.5	21.833	23.467	21.5	20.767	22.333
1996	3	28.667	28.7	29	28.333	28.4	28.4	28.133	27.667	27.5	26.8	28.033	28.267	27.033	27.6	26.9	26.433	25.067	26	26.067	27.267	26	26.767	25.5	27.333	26.9	25.233	26	23.8	24.533	24.8	25	25.2	23.867	26.333	23.6	25.5	27.367	26.133	26.1	24.433	25.433	24	22.933	24.133	25.367	23.9	23.567	25.367
1996	4	28.533	28.633	28.933	28.2	28.167	28.233	28	27.533	27.367	26.567	27.9	28.167	26.833	27.5	26.7	26.467	25	25.967	26.033	27.3	25.867	26.533	25.433	27.2	26.767	25.167	26.033	23.767	24.533	24.767	24.933	25.1	23.633	26.167	23.233	25.533	27.467	25.967	26.133	24.467	25.533	23.967	22.833	24.133	25.367	23.733	23.333	25.233
1996	5	26.2	26.367	26.533	26.267	26.067	26.1	25.9	25.467	25.367	24.633	25.667	26.567	25.3	25.8	24.967	24.9	23.7	24.5	24.467	25.4	24.167	24.3	22.8	25.833	25.4	24.067	24.7	23.033	23.567	23.667	23.6	23.667	22.367	24.267	21.833	23.067	24.367	25.067	25.033	23.933	24.7	23.3	22.233	23.167	24.1	22.633	22.2	23.6
1996	6	27.267	28.3	28.4	26.867	26.8	26.967	26.833	26.4	26.4	25.467	26.8	27.233	25.633	26.333	25.5	25.233	23.767	25.133	25.2	26.5	24.8	24.767	23.067	26.333	25.8	23.867	24.933	23.167	24.033	24.267	24.233	24.367	22.633	25.1	21.8	23.7	25.067	25.3	25.1	24.167	25.367	23.667	22.367	23.733	25	23.1	22.5	24.367
1996	7	26.1	27.667	27.7	25.7	25.667	25.833	25.733	25.267	25.3	24.333	25.733	26.133	24.467	25.267	24.333	24.7	23.1	24.433	24.467	25.767	23.967	23.833	21.767	25.3	24.733	23.333	24.4	22.367	23.3	23.533	23.467	23.567	21.7	24.233	20.6	22.4	23.867	24.3	24.733	23.5	24.8	22.933	21.5	23.033	24.367	22.233	21.6	23.433
1996	8	24.9	25.933	25.967	24.833	24.7	24.8	24.633	24.167	24.133	23.1	24.367	25.3	23.733	24.433	23.467	23.7	22.2	23.367	23.367	24.467	22.7	22.4	20.367	24.6	24.033	22.6	23.533	21.6	22.367	22.567	22.467	22.433	20.567	22.833	19.5	20.833	22.4	23.767	24	22.8	24	22.2	20.8	22.133	23.3	21.267	20.533	22.2
1997	3	28.367	28.4	28.733	28.167	28.167	28.167	27.833	27.333	27.167	26.4	27.7	28.267	26.9	27.467	26.7	26.167	24.733	25.633	25.733	26.967	25.633	26.367	25.267	27.167	26.8	25.033	25.733	23.467	24.233	24.467	24.6	24.833	23.467	25.933	23.167	25.267	27.2	25.967	25.867	24.2	25.2	23.7	22.567	23.8	25.033	23.467	23.1	24.967
1997	4	27.867	28	28.267	27.8	27.733	27.733	27.4	26.933	26.733	26.033	27.3	27.9	26.567	27.133	26.333	26.2	24.8	25.7	25.7	26.9	25.6	26.167	24.933	26.933	26.533	24.933	25.8	23.633	24.333	24.533	24.667	24.833	23.467	25.833	23.133	25	26.767	25.767	25.833	24.433	25.367	23.867	22.767	23.933	25.067	23.533	23.167	24.933
1997	5	28.4	28.567	28.733	28.667	28.5	28.5	28.133	27.733	27.533	26.8	27.8	28.967	27.8	28.267	27.433	27.3	26.033	26.8	26.733	27.6	26.367	26.633	25.5	28.2	27.9	26.533	27.1	25.367	25.867	25.933	25.867	25.933	24.633	26.467	24.133	25.633	26.833	27.467	27.367	26.267	27	25.6	24.567	25.4	26.3	24.867	24.467	25.8
1997	6	28.833	29.9	30	28.733	28.5	28.633	28.4	28	28	27.067	28.333	29.067	27.567	28.067	27.233	26.667	25.3	26.533	26.6	27.833	26.233	26.2	24.533	27.967	27.533	25.667	26.367	24.667	25.5	25.7	25.7	25.8	24.167	26.5	23.367	25.133	26.5	26.967	26.7	25.633	26.767	25.133	23.9	25.2	26.433	24.6	24.067	25.767
1997	7	26.167	27.633	27.667	25.567	25.7	25.9	25.8	25.367	25.333	24.3	25.767	26	24.4	25.367	24.4	24.733	23.1	24.467	24.5	25.833	23.967	23.8	21.8	25.333	24.833	23.367	24.467	22.4	23.3	23.567	23.467	23.6	21.633	24.233	20.533	22.467	24.033	24.3	24.7	23.533	24.867	22.967	21.533	23	24.367	22.2	21.567	23.467
1997	8	26.2	27.367	27.333	26.1	26	26.2	26	25.5	25.433	24.4	25.667	26.5	24.933	25.7	24.767	25.1	23.5	24.7	24.667	25.833	24	23.733	21.967	25.667	25.2	23.8	24.9	22.833	23.7	23.867	23.767	23.733	21.8	24.167	20.633	22.433	23.967	24.8	25.1	24	25.2	23.4	22.033	23.4	24.667	22.533	21.8	23.5
1998	3	29.3	29.367	29.667	28.9	28.967	29	28.733	28.233	28.033	27.233	28.667	28.833	27.5	28.133	27.433	26.933	25.5	26.467	26.533	27.8	26.433	27.2	25.933	27.767	27.367	25.633	26.5	24.067	24.9	25.2	25.367	25.567	24.133	26.733	23.8	25.9	27.967	26.5	26.567	24.733	25.833	24.3	23.2	24.5	25.8	24.167	23.8	25.733
1998	4	30.867	31	31.333	30.533	30.767	30.833	30.6	30.1	30	29.2	30.3	30.433	29.133	30.067	29.233	29.033	27.567	28.533	28.633	29.9	28.467	29.167	27.7	29.667	29.267	27.667	28.567	26.233	27.067	27.333	27.5	27.7	26.233	28.767	25.833	27.767	29.767	28.433	28.6	26.9	28.033	26.5	25.333	26.7	28	26.333	25.933	27.8
1998	5	29.133	29.267	29.467	29.233	29	29	28.767	28.2	28	27.133	28.433	29.367	27.967	28.567	27.567	27.567	26	26.933	26.867	28.033	26.5	26.833	25.6	28.467	28	26.467	27.267	25.033	25.733	25.867	25.867	25.9	24.3	26.667	23.667	25.733	27.533	27.433	27.567	26	27.067	25.4	24.1	25.333	26.4	24.633	24.1	25.867
1998	6	31.333	32.533	32.6	31	30.933	31.033	30.833	30.333	30.3	29.3	30.667	31.2	29.6	30.333	29.467	29.1	27.6	28.867	28.867	30.2	28.467	28.633	26.867	30.2	29.667	27.667	28.767	26.8	27.667	27.867	27.833	27.967	26.2	28.733	25.4	27.367	29.033	29.1	28.867	27.733	28.967	27.233	25.933	27.3	28.633	26.633	26.033	27.933
1998	7	25.7	27.2	27.267	25.333	25.267	25.5	25.367	24.9	24.9	23.9	25.333	25.933	24.133	24.933	23.967	24.333	22.7	24.067	24.067	25.4	23.567	23.433	21.567	25.1	24.533	23	24.067	21.967	22.867	23.167	23.133	23.233	21.3	23.867	20.2	22.2	23.7	24.133	24.5	23.167	24.433	22.567	21.167	22.633	24	21.867	21.2	23.1
1998	8	24.767	25.833	25.833	24.567	24.067	24.2	24.067	23.633	23.533	22.6	24.3	24.9	23.467	23.8	22.933	23.2	21.733	22.867	22.833	23.933	22.2	21.967	20.067	23.933	23.5	22	23	21.067	21.9	22.133	22.1	22.067	20.3	22.4	19.067	20.533	22	23.167	23.4	22.1	23.3	21.633	20.4	21.733	22.9	20.967	20.267	21.833
1999	3	28.867	28.967	29.233	28.6	28.733	28.733	28.533	28.033	27.833	27.067	28.3	28.6	27.3	27.967	27.233	26.733	25.367	26.3	26.367	27.633	26.267	27.033	25.633	27.733	27.333	25.533	26.333	24.033	24.8	25.1	25.3	25.5	24.133	26.667	23.833	25.633	27.6	26.5	26.5	24.7	25.733	24.233	23.167	24.433	25.7	24.133	23.8	25.667
1999	4	29.867	30	30.233	29.733	29.967	29.933	29.667	29.167	28.967	28.2	29.267	29.9	28.533	29.367	28.533	28.2	26.733	27.6	27.667	28.833	27.5	28.067	26.667	29.067	28.533	27.133	27.833	25.567	26.267	26.433	26.5	26.7	25.267	27.7	24.933	26.8	28.633	27.933	27.9	26.4	27.333	25.733	24.567	25.767	26.933	25.367	24.967	26.8
1999	5	30.333	30.567	30.733	30.2	30.033	30.067	29.933	29.433	29.367	28.567	29.767	30.233	29.033	29.667	28.767	28.767	27.367	28.367	28.333	29.433	27.967	28.067	26.667	29.433	28.967	27.667	28.467	26.533	27.2	27.233	27.2	27.267	25.733	27.967	25.133	26.867	28.533	28.5	28.567	27.267	28.267	26.7	25.533	26.667	27.733	26.067	25.567	27.2
1999	6	30.433	31.567	31.6	30.067	29.967	30.067	29.9	29.467	29.467	28.533	29.833	30.433	28.833	29.5	28.6	28.3	26.833	28.133	28.2	29.4	27.8	27.967	26.133	29.5	28.967	27	27.967	26.167	27	27.233	27.167	27.3	25.633	28.1	24.833	26.633	28.2	28.467	28.167	27.2	28.333	26.633	25.367	26.7	27.933	26.033	25.433	27.267
1999	7	26.3	27.8	27.867	25.867	24.8	25.033	24.9	24.467	24.467	23.467	25.933	26.2	24.6	24.4	23.467	23.867	22.2	23.567	23.6	25	23.1	22.933	20.933	24.4	23.867	22.4	23.533	21.367	22.333	22.6	22.6	22.7	20.7	23.4	19.6	21.6	23.167	23.333	23.833	22.433	23.767	21.933	20.5	22.033	23.467	21.333	20.633	22.533
1999	8	24.833	26.6	26.633	24.633	24.667	24.8	24.633	24.1	24.067	23	24.3	25	23.467	24.233	23.367	23.533	21.9	23.1	23.067	24.267	22.4	22.133	20.367	24.2	23.733	22.267	23.3	21.133	22.033	22.2	22.133	22.133	20.233	22.6	19	20.767	22.567	23.367	23.6	22.267	23.5	21.7	20.333	21.767	23.033	20.933	20.167	21.9
2000	3	29.2	29.267	29.567	29.033	29.2	29.2	28.933	28.433	28.233	27.5	28.6	29.1	27.8	28.5	27.767	27.233	25.9	26.733	26.833	27.967	26.733	27.333	25.933	28.3	27.867	26.133	26.867	24.7	25.433	25.567	25.7	25.9	24.6	26.967	24.367	26.033	27.8	27.133	27.067	25.367	26.3	24.833	23.733	24.933	26.067	24.6	24.267	26.067
2000	4	29	29.133	29.433	28.533	28.7	28.767	28.633	28.133	28.1	27.3	28.467	28.633	27.233	28.067	27.3	27.067	25.7	26.733	26.8	28.067	26.667	27.4	25.767	27.933	27.5	25.833	26.7	24.6	25.367	25.767	25.867	26.067	24.6	27.1	24.233	25.933	27.733	26.8	26.9	25.5	26.567	25	23.867	25.1	26.367	24.733	24.333	26.2
2000	5	29.5	29.667	29.833	29.367	29.333	29.333	29.067	28.567	28.4	27.6	28.8	29.533	28.167	28.9	27.967	27.9	26.467	27.367	27.3	28.367	26.9	27.267	25.867	28.733	28.233	26.9	27.633	25.567	26.233	26.333	26.3	26.367	24.867	27.067	24.267	25.933	27.7	27.8	27.767	26.567	27.533	25.933	24.7	25.8	26.833	25.167	24.667	26.3
2000	6	30.467	31.767	31.833	30.333	30.1	30.233	30	29.533	29.567	28.567	29.967	30.7	29.067	29.6	28.7	28.167	26.667	28	28.067	29.367	27.667	27.7	25.967	29.4	28.833	27.067	27.833	26	26.867	27.1	27.1	27.233	25.4	27.967	24.6	26.6	28.033	28.3	28.1	27.033	28.2	26.467	25.2	26.567	27.867	25.867	25.3	27.2
2000	7	26.967	28.533	28.6	26.4	26.267	26.533	26.533	26.067	26.1	25.133	26.567	26.8	25.133	25.933	24.967	25.333	23.7	25.067	25.167	26.5	24.6	24.467	22.533	25.9	25.333	23.9	25	22.9	23.867	24.133	24.1	24.2	22.267	24.933	21.167	23.167	24.7	24.867	25.333	23.967	25.333	23.467	22.067	23.633	25.067	22.9	22.167	24.1
2000	8	25.467	26.367	26.367	25.167	25.167	25.3	25.2	24.7	24.633	23.6	24.9	25.6	24	24.867	23.933	24.2	22.533	23.8	23.767	24.967	23.067	22.833	20.967	25.067	24.5	22.933	23.967	21.733	22.6	22.833	22.8	22.8	20.833	23.267	19.567	21.4	23.167	24.133	24.433	22.833	24.133	22.333	20.933	22.4	23.7	21.533	20.8	22.533
2001	3	28.433	28.467	28.8	28.033	28.033	28.1	27.833	27.3	27.133	26.2	27.833	28.033	26.5	27.133	26.367	25.933	24.333	25.4	25.533	26.933	25.433	26.267	24.833	26.967	26.467	24.5	25.433	22.833	23.767	24.233	24.433	24.7	23.1	25.933	22.633	24.933	27.067	25.567	25.667	23.733	24.967	23.267	22	23.467	24.933	23.133	22.733	24.867
2001	4	29.233	29.3	29.633	28.933	28.933	28.967	28.733	28.2	27.967	27.133	28.567	29.133	27.533	28.2	27.367	27.1	25.567	26.533	26.533	28	26.533	27.233	26.067	28.033	27.633	26	26.833	24.367	25.2	25.433	25.533	25.7	24.2	26.8	23.833	26.1	28.133	26.767	26.933	25.167	26.267	24.633	23.4	24.733	25.967	24.3	23.867	25.833
2001	5	30.167	30.3	30.5	30	29.833	29.933	29.733	29.2	29.033	28.133	29.433	29.967	28.633	29.333	28.4	28.433	26.9	27.9	27.933	29	27.433	27.733	26.4	28.967	28.533	27.067	28	25.733	26.533	26.7	26.733	26.833	25.2	27.6	24.467	26.5	28.367	27.9	28.1	26.6	27.733	26.1	24.8	26.1	27.3	25.467	24.967	26.733
2001	6	28.3	29.333	29.4	27.833	27.833	27.967	27.867	27.433	27.4	26.433	27.8	28.1	26.533	27.3	26.433	26.2	24.767	26.1	26.133	27.467	25.767	25.767	24.3	27.167	26.633	24.767	25.867	24.067	24.933	25.2	25.167	25.3	23.567	26.1	22.7	24.6	26.367	26.033	25.967	25	26.267	24.533	23.233	24.667	25.967	24.033	23.433	25.267
2001	7	25.1	26.7	26.767	24.667	24.6	24.8	24.733	24.367	24.367	23.567	24.867	25	23.567	24.3	23.467	23.833	22.467	23.667	23.7	25.367	23.767	23.7	22.1	24.867	24.4	23.1	24.1	22.233	23.067	23.3	23.3	23.367	21.733	24.033	20.833	22.7	24.033	24.033	24.367	23.233	24.367	22.733	21.5	22.867	24.1	22.233	21.667	23.333
2001	8	24.1	25.267	25.233	23.8	23.7	23.833	23.7	23.267	23.4	22.467	23.6	24.167	22.8	23.5	22.633	22.867	21.467	22.533	22.667	23.733	22.067	21.733	20.167	23.5	23.067	22.1	23.033	21.2	21.933	22.1	21.9	21.9	20.167	22.167	19	20.533	21.967	23.167	23.367	22.2	23.3	21.7	20.5	21.733	22.7	20.867	20.167	21.633
2002	3	29.4	29.5	29.867	28.667	28.767	28.867	28.667	28.233	28.133	27.333	28.833	28.533	27.133	27.867	27.167	26.733	25.333	26.467	26.567	27.767	26.367	27.133	25.667	27.2	26.8	25.067	26.033	23.833	24.7	24.967	25.167	25.433	24.067	26.7	23.833	25.833	27.8	25.9	25.933	24.4	25.567	24	22.867	24.3	25.6	24	23.667	25.733
2002	4	29.233	29.667	29.933	29.2	28.9	28.933	28.7	28.233	28.067	27.267	28.7	29.267	27.833	28.233	27.4	27.1	25.633	26.633	26.733	28	26.6	27.333	25.933	28.2	27.7	25.867	26.7	24.367	25.167	25.6	25.7	25.933	24.433	27.033	24.1	26.033	27.933	27	27.033	25.333	26.367	24.767	23.567	24.9	26.2	24.533	24.133	26.067
2002	5	30.5	30.867	31.033	30.3	30.233	30.267	30.033	29.533	29.433	28.533	29.767	30.4	29	29.7	28.833	28.633	27.133	28.133	28.067	29.267	27.7	28.067	26.633	29.5	29.033	27.433	28.267	26.133	26.9	27.033	27.067	27.133	25.533	27.9	24.9	26.733	28.7	28.633	28.5	27	28.1	26.467	25.233	26.467	27.6	25.8	25.3	27.033
2002	6	29.6	30.8	30.833	29.367	29.2	29.333	29.167	28.733	28.7	27.733	29.033	29.633	28.133	28.867	27.833	27.733	26.333	27.567	27.633	28.833	27.167	27.167	25.467	28.733	28.233	26.4	27.4	25.633	26.467	26.7	26.667	26.733	25.033	27.4	24.133	25.967	27.367	27.767	27.7	26.567	27.767	26.1	24.867	26.167	27.4	25.5	24.9	26.633
2002	7	28.133	29.667	29.7	27.633	27.7	27.9	27.8	27.4	27.367	26.5	27.8	27.967	26.5	27.233	26.533	26.767	25.333	26.533	26.567	27.767	26.2	26.4	24.667	27.2	26.733	25.5	26.533	24.7	25.533	25.733	25.667	25.767	24.167	26.733	23.733	25.667	26.667	25.233	25.933	25.767	26.933	25.2	23.933	25.267	26.467	24.567	24.067	26.033
2002	8	25.267	26.4	26.367	25.267	25.067	25.167	25	24.533	24.433	23.5	24.633	25.633	24.267	24.8	23.967	24.167	22.733	23.767	23.7	24.667	23	22.9	21.267	24.933	24.5	23.1	24	22.133	22.833	23.133	23.033	23	21.267	23.267	20.067	21.633	23.067	24.233	24.433	23.333	24.4	22.767	21.533	22.733	23.767	21.9	21.233	22.667
2003	3	28.633	28.7	29	28.3	28.433	28.467	28.2	27.7	27.567	26.733	28.033	28.267	26.867	27.567	26.867	26.367	24.933	25.9	26	27.3	25.9	26.667	25.333	27.267	26.867	25.067	25.867	23.633	24.4	24.667	24.833	25.067	23.633	26.233	23.367	25.4	27.367	25.967	26	24.3	25.367	23.833	22.667	23.967	25.233	23.633	23.267	25.233
2003	4	29.1	29.233	29.5	28.767	28.6	28.667	28.433	28	27.867	27.067	28.467	28.667	27.367	27.9	27.1	26.867	25.467	26.467	26.5	27.767	26.367	27.033	25.733	27.567	27.133	25.567	26.433	24.267	25.033	25.267	25.4	25.567	24.133	26.633	23.8	25.8	27.7	26.367	26.5	24.933	26	24.467	23.367	24.567	25.833	24.233	23.867	25.7
2003	5	29.333	29.533	29.7	29.5	29.133	29.167	28.933	28.5	28.3	27.5	28.667	29.4	28.2	28.833	27.8	27.9	26.5	27.333	27.267	28.3	26.9	27.267	26.067	28.567	28.2	26.8	27.533	25.6	26.233	26.333	26.3	26.333	24.9	27.033	24.333	26.1	27.767	27.733	27.867	26.4	27.367	25.9	24.733	25.767	26.767	25.133	24.633	26.233
2003	6	29.5	30.667	30.7	29.233	28.933	29.067	28.933	28.5	28.5	27.6	28.967	29.333	27.967	28.467	27.7	27.367	26.067	27.233	27.267	28.433	26.9	26.933	25.5	28.233	27.867	26.067	27.033	25.433	26.2	26.433	26.4	26.467	24.9	27.167	24.133	25.967	27.333	27.3	27.1	26.233	27.4	25.867	24.733	25.967	27.133	25.333	24.767	26.433
2003	7	25.433	26.7	26.733	25.267	25.133	25.267	25.133	24.7	24.667	23.8	25	25.7	24.233	24.867	23.967	24.567	23.133	24.233	24.233	25.333	23.733	23.533	21.833	25	24.467	23.467	24.4	22.5	23.267	23.433	23.4	23.433	21.667	23.9	20.667	22.3	23.567	24.733	24.833	23.567	24.633	22.967	21.7	23	24.133	22.267	21.633	23.233
2003	8	24.567	25.467	25.433	24.633	24.4	24.533	24.367	23.967	23.9	23.033	24.033	24.967	23.7	24.367	23.433	23.867	22.567	23.5	23.467	24.367	22.833	22.6	21.1	24.367	23.967	22.9	23.733	22.033	22.7	22.8	22.7	22.667	21.067	22.933	19.967	21.433	22.7	23.733	24.267	23	23.967	22.5	21.367	22.433	23.4	21.7	21.067	22.4
2004	3	29.033	29.2	29.5	28.767	28.667	28.7	28.433	27.9	27.767	26.9	28.367	28.7	27.3	27.967	27.067	26.6	25.167	26.167	26.233	27.533	26.133	26.9	25.533	27.667	27.2	25.333	26.167	23.733	24.6	24.833	25.033	25.233	23.8	26.433	23.5	25.567	27.4	26.633	26.567	24.5	25.6	24.033	22.867	24.167	25.467	23.8	23.433	25.4
2004	4	28.467	29.1	29.367	28.3	28.033	28.1	27.9	27.467	27.4	26.6	27.933	28.333	27	27.667	26.6	26.5	25.067	26.067	26.133	27.367	26.033	26.6	25.233	27.333	26.933	25.2	26.033	23.833	24.667	24.9	25.067	25.267	23.8	26.3	23.433	25.333	27.1	26.733	26.867	24.533	25.6	24.067	22.967	24.3	25.533	23.9	23.533	25.4
2004	5	29.767	30.033	30.167	30	29.767	29.767	29.467	28.967	28.767	27.9	29.033	30.3	28.9	29.4	28.5	28.233	26.833	27.633	27.567	28.6	27.167	27.433	26.133	29.5	28.967	27.367	28.033	26.067	26.6	26.7	26.633	26.667	25.133	27.3	24.533	26.267	27.833	28.7	28.367	27.033	27.9	26.3	25.067	26.1	27.133	25.467	24.967	26.5
2004	6	28.633	29.533	29.633	28.6	28.433	28.5	28.3	27.833	27.733	26.833	28.067	28.967	27.4	28.033	27.133	27.067	25.633	26.733	26.767	27.967	26.4	26.433	24.767	28.067	27.567	25.867	26.8	24.967	25.733	25.9	25.833	25.933	24.3	26.633	23.5	25.333	26.7	26.967	27.1	25.967	27.033	25.333	24.1	25.367	26.567	24.7	24.167	25.9
2004	7	26.933	28.533	28.5	26.733	26.533	26.733	26.567	26.167	26.2	25.267	26.567	27.1	25.667	26.367	25.333	25.9	24.433	25.633	25.633	26.8	25.233	25.467	23.8	26.367	25.9	24.667	25.6	23.767	24.567	24.767	24.767	24.833	23.233	25.767	22.833	24.7	25.833	25.133	25.933	24.767	25.867	24.233	23	24.3	25.533	23.633	23.167	25.1
2004	8	25.067	26.033	26	25.367	25	25.067	24.9	24.4	24.3	23.367	24.467	25.733	24.333	25	23.867	24.467	23	24.033	23.933	24.933	23.267	22.967	21.367	25.067	24.6	23.433	24.367	22.3	23.067	23.2	23.133	23.1	21.3	23.333	20.1	21.667	23.067	24.6	25.067	23.367	24.5	22.867	21.6	22.8	23.9	22.033	21.3	22.767
2005	3	29.267	29.333	29.633	29	28.933	28.933	28.667	28.2	28.033	27.167	28.667	29.033	27.567	28.2	27.3	27.067	25.5	26.6	26.7	28.033	26.567	27.3	25.833	27.933	27.433	25.733	26.6	24.167	25.033	25.333	25.5	25.733	24.2	26.933	23.867	25.933	27.933	26.367	26.367	24.9	26.067	24.433	23.233	24.633	25.967	24.267	23.867	25.9
2005	4	29.133	29.2	29.5	28.8	28.733	28.767	28.567	28.067	27.967	27.133	28.567	28.8	27.367	28.033	27.2	26.967	25.5	26.567	26.6	27.933	26.467	27.133	25.667	27.8	27.333	25.7	26.567	24.267	25.067	25.333	25.5	25.667	24.233	26.767	23.8	25.833	27.7	26.367	26.5	25	26.1	24.5	23.3	24.667	25.967	24.267	23.867	25.8
2005	5	28.033	28.333	28.533	28.233	27.933	27.9	27.667	27.2	26.967	26.233	27.4	28.3	27.1	27.6	26.633	26.8	25.433	26.167	26.133	27.133	25.867	26.533	25.4	27.467	27.067	25.833	26.533	24.467	25.067	25.167	25.167	25.267	24	26.1	23.767	25.533	27.1	26.233	26.733	25.267	26.133	24.667	23.6	24.6	25.6	24.1	23.733	25.367
2005	6	29.167	30.1	30.133	29.133	28.833	28.933	28.8	28.367	28.3	27.433	28.567	29.367	27.967	28.6	27.633	27.6	26.3	27.4	27.433	28.5	27.033	26.967	25.433	28.533	28.067	26.4	27.3	25.633	26.367	26.6	26.567	26.6	25.067	27.167	24.1	25.7	26.967	27.5	27.333	26.533	27.6	26.067	24.9	26.1	27.2	25.5	24.967	26.467
2005	7	25.7	27.233	27.233	25.567	25.267	25.433	25.367	24.933	24.9	24.033	25.333	26	24.533	25.233	24.1	24.9	23.4	24.567	24.567	25.767	24.133	24.2	22.5	25.3	24.8	23.733	24.633	22.8	23.533	23.767	23.667	23.767	22.067	24.333	21.333	23.067	24.367	24.333	25.067	23.867	24.967	23.267	22	23.267	24.433	22.533	21.967	23.633
2005	8	25.3	26.5	26.467	25.467	25.167	25.267	25.133	24.7	24.6	23.7	24.8	25.833	24.5	25.133	24.067	24.733	23.267	24.3	24.2	25.2	23.533	23.467	21.933	25.2	24.733	23.7	24.6	22.7	23.4	23.5	23.367	23.333	21.6	23.6	20.633	22.2	23.733	24.567	25.033	23.767	24.8	23.167	21.9	23.1	24.167	22.3	21.567	23.033
2006	3	28.567	28.9	29.2	28.267	28.2	28.267	28.033	27.5	27.333	26.567	27.967	28.233	26.867	27.533	26.667	26.433	24.967	25.967	26	27.333	25.967	27.333	26	27.2	26.733	25.167	26	23.633	24.467	24.733	24.867	25.067	23.7	26.267	23.967	26	28	25.933	26.133	24.333	25.4	23.867	22.767	24.033	25.333	23.7	23.333	25.267
2006	4	27.633	27.733	28	27.6	27.3	27.333	27.133	26.6	26.433	25.633	26.933	27.5	26.233	26.9	25.833	25.8	24.367	25.267	25.267	26.467	25.067	26.333	25.167	26.567	26.167	24.6	25.4	23.167	23.867	24.033	24.2	24.3	22.9	25.333	23.1	25.067	27.1	25.467	25.6	23.833	24.867	23.367	22.2	23.433	24.6	23.033	22.6	24.4
2006	5	27.433	27.8	27.933	27.667	27.267	27.333	27.133	26.633	26.5	25.767	26.8	27.8	26.6	27.133	26.1	26.5	25.167	25.967	25.9	26.8	25.467	26.667	25.533	27.033	26.667	25.6	26.233	24.433	24.967	25.033	24.967	25.033	23.633	25.567	24	25.567	27.167	26.533	26.533	25.333	26.167	24.667	23.567	24.533	25.433	23.9	23.433	24.867
2006	6	29.267	30.4	30.433	29.167	28.933	29.067	28.933	28.433	28.433	27.533	28.767	29.433	27.967	28.667	27.7	27.6	26.133	27.333	27.4	28.567	27.033	27.567	25.967	28.6	28.133	26.3	27.267	25.533	26.333	26.533	26.5	26.6	25	27.267	24.767	26.567	27.833	27.767	27.467	26.567	27.7	26	24.8	26.033	27.233	25.4	24.867	26.567
2006	7	26.233	27.8	27.833	25.7	25.533	25.733	25.6	25.433	25.467	24.533	25.867	26.033	24.5	25.267	24.3	24.9	23.4	24.633	24.7	25.9	24.2	24.067	22.3	25.267	24.767	23.6	24.633	22.7	23.567	23.8	23.767	23.833	22.067	24.467	21.067	22.833	24.3	24.367	24.767	23.7	24.933	23.233	21.9	23.3	24.6	22.567	21.967	23.733
2006	8	25.4	26.5	26.467	25.133	24.833	24.967	24.833	24.7	24.633	23.667	24.867	25.5	24.067	24.8	23.7	24.333	22.867	23.967	23.9	24.967	23.233	22.967	21.367	24.833	24.367	23.167	24.133	22.2	22.967	23.133	23.033	23.033	21.267	23.367	20.067	21.733	23.233	24.133	24.7	23.2	24.367	22.7	21.467	22.733	23.9	21.967	21.267	22.767
2007	3	28.7	28.767	29.067	28.533	28.467	28.5	28.2	27.667	27.5	26.767	28.067	28.5	27.2	27.733	27	26.6	25	25.933	26	27.233	25.933	26.7	25.467	27.5	27.067	25.433	26.167	23.767	24.533	24.767	24.933	25.133	23.767	26.233	23.533	25.5	27.433	26.567	25.9	24.667	25.7	24	22.9	24.067	25.3	23.767	23.433	25.3
2007	4	28.867	29.167	29.433	28.6	28.567	28.633	28.333	27.867	27.733	26.967	28.3	28.6	27.3	27.9	27.1	27.033	25.633	26.567	26.6	27.767	26.467	27.7	26.5	27.167	26.733	25.7	26.667	24.433	25.167	25.4	25.533	25.7	24.3	26.733	24.6	26.533	28.433	25.967	26.1	25.167	26.2	24.7	23.567	24.767	25.933	24.4	24	25.8
2007	5	29.4	29.8	29.967	29.433	29.3	29.367	28.933	28.467	28.333	27.467	28.767	29.6	28.233	28.867	27.9	28	26.6	27.467	27.433	28.5	27.033	28.333	27.033	28.7	28.333	26.8	27.733	25.7	26.367	26.6	26.533	26.6	25.067	27.267	25.267	27.067	28.8	27.767	27.867	26.733	27.7	26.1	24.9	26	27.033	25.367	24.867	26.5
2007	6	27.833	28.767	28.9	27.4	27.5	27.6	27.367	26.9	26.967	26	27.333	27.733	26.233	27	26.167	25.967	24.567	25.867	25.9	27.167	25.567	26.333	24.667	27.433	26.9	24.567	25.633	23.967	24.767	25.033	24.967	25.067	23.4	25.867	23.267	25.1	26.633	26.4	26.167	24.9	26.067	24.433	23.167	24.5	25.733	23.833	23.3	25.133
2007	7	24.8	26.4	26.367	24.633	24.433	24.567	24.433	24.167	24.133	23.2	24.4	25.067	23.667	24.2	23.333	23.7	22.3	23.4	23.433	24.5	22.8	22.5	20.867	24.2	23.7	22.467	23.5	21.667	22.467	22.6	22.567	22.567	20.867	22.933	19.6	21.167	22.633	23.4	23.667	22.733	23.867	22.233	20.967	22.2	23.333	21.433	20.767	22.3
2007	8	24.967	26.3	26.267	25.1	24.8	24.933	24.767	24.333	24.233	23.3	24.433	25.533	24.1	24.567	23.667	24.1	22.633	23.7	23.633	24.7	22.967	23.4	21.733	24.6	24.133	22.8	23.933	22	22.733	22.9	22.833	22.8	21	23.1	20.533	22.1	23.6	23.9	24.067	23.067	24.167	22.533	21.3	22.533	23.667	21.733	21.033	22.5
2008	3	29.767	29.867	30.167	29.433	29.5	29.533	29.267	28.733	28.567	27.8	29.167	29.6	28.1	28.733	27.967	27.4	26	26.967	27.067	28.333	27.033	27.733	26.433	28.6	28.1	26.2	27	24.733	25.5	25.733	25.933	26.133	24.767	27.333	24.5	26.5	28.433	27.333	27.267	25.4	26.433	24.9	23.8	25.067	26.333	24.733	24.4	26.333
2008	4	28.933	29.1	29.367	28.467	28.4	28.4	28.167	28	27.867	27.133	28.333	28.7	27.267	27.8	27.033	27.033	25.733	26.567	26.567	27.667	26.5	27.1	25.967	27.833	27.4	25.7	26.7	24.667	25.333	25.5	25.567	25.733	24.433	26.667	24.2	26	27.733	26.733	26.767	25.433	26.333	24.867	23.8	24.867	25.967	24.5	24.167	25.833
2008	5	28.967	29.167	29.3	29.033	28.833	28.9	28.667	28.067	27.967	27.167	28.3	29.967	27.933	28.5	27.567	27.433	26	26.933	26.9	28	26.533	26.767	25.4	29.133	28.7	26.5	27.133	25.167	25.833	25.967	25.933	26	24.5	26.7	23.833	25.633	27.233	28.267	28.233	26.133	27.067	25.5	24.267	25.4	26.467	24.767	24.267	25.9
2008	6	28.633	29.733	29.8	28.5	28.433	28.533	28.367	27.733	27.667	26.7	28.067	29	27.2	27.9	27.067	26.533	25.067	26.3	26.367	27.667	26	26.033	24.3	28.067	27.567	25.367	26.2	24.4	25.233	25.433	25.367	25.467	23.767	26.233	23	24.933	26.333	27	26.833	25.4	26.6	24.833	23.5	24.867	26.167	24.2	23.633	25.467
2008	7	26.467	28.1	28.167	25.933	25.9	26.1	26	25.667	25.7	24.767	26.133	27.1	24.8	25.6	24.667	25.067	23.533	24.9	24.9	26.2	24.4	24.233	22.333	26.367	25.8	23.667	24.8	22.867	23.767	24	23.933	24.033	22.133	24.633	21.133	23	24.433	25.367	25.767	23.967	25.233	23.433	22.033	23.5	24.767	22.733	22.067	23.933
2008	8	25.067	26.133	26.133	25.233	25.1	25.2	25.033	24.3	24.233	23.133	24.467	25.467	24.033	24.8	23.8	23.8	22.167	23.433	23.4	24.6	22.7	22.433	20.567	24.667	24.1	22.8	23.6	21.467	22.333	22.5	22.433	22.433	20.433	22.867	19.167	21.067	22.733	23.767	24.067	22.7	24	22.133	20.667	22.1	23.4	21.167	20.433	22.167
2009	3	29.667	29.733	30	29.567	29.533	29.533	29.267	28.6	28.467	27.7	29.033	29.667	28.233	28.833	28.067	27.467	25.933	26.867	26.933	28.2	26.9	27.6	26.267	28.667	28.133	26.3	27.067	24.667	25.433	25.667	25.833	26.033	24.633	27.2	24.4	26.367	28.233	27.033	27.333	25.567	26.533	24.867	23.767	24.967	26.233	24.667	24.333	26.2
2009	4	29.433	29.567	29.867	30	29.367	29.467	29.233	28.4	28.233	27.433	28.867	29.967	28.567	28.7	27.867	27.3	25.767	26.833	26.9	28.167	26.733	27.4	26.067	28.567	28.1	26.367	26.833	24.567	25.367	25.633	25.733	25.933	24.467	27	24.067	26.1	28.1	27.333	27.467	25.367	26.433	24.833	23.6	24.967	26.2	24.533	24.1	26.067
2009	5	29.4	29.6	29.8	29.4	29.2	29.233	29	28.533	28.433	27.6	28.767	29.433	28.3	28.867	27.933	27.9	26.533	27.4	27.367	28.433	27.067	27.567	26.333	28.633	28.2	26.867	27.633	25.667	26.3	26.433	26.433	26.5	25.133	27.333	24.9	26.7	28.1	27.767	27.767	26.533	27.433	26	24.833	25.9	26.9	25.3	24.933	26.567
2009	6	30.1	31.267	31.333	30.067	30.067	30.1	29.933	29.333	29.2	28.333	29.533	30.433	28.967	29.567	28.767	28.333	26.833	27.967	28	29.167	27.633	27.667	26.133	29.567	29	27.1	28.033	26.2	26.933	27.1	27.067	27.167	25.6	27.867	24.9	26.633	27.967	28.4	27.967	27.3	28.333	26.6	25.367	26.633	27.767	25.967	25.467	27.167
2009	7	27	28.567	28.6	26.4	26.333	26.533	26.367	26.2	26.167	25.2	26.6	26.767	25.233	26	25.033	25.367	24.1	25.367	25.4	26.667	24.867	24.667	22.767	26	25.467	24.067	25.1	23.3	24.2	24.467	24.4	24.5	22.6	25.1	21.467	23.367	24.867	24.933	25.267	24.133	25.4	23.867	22.533	23.933	25.267	23.2	22.5	24.333
2009	8	26.133	27.233	27.267	26	25.867	26	25.8	25.4	25.367	24.333	25.6	26.367	24.867	25.633	24.633	24.733	23.433	24.633	24.533	25.7	23.867	23.6	21.867	25.7	25.167	23.567	24.567	22.7	23.567	23.733	23.667	23.667	21.767	24.033	20.533	22.267	23.833	24.467	24.567	23.633	24.867	23.3	21.967	23.3	24.567	22.467	21.733	23.367
2010	3	28.633	28.5	28.8	28.133	28.367	28.4	28.2	27.767	27.667	26.867	28.1	28.033	26.733	27.567	26.9	26.333	25	26	26.1	27.367	26.033	27.6	26.3	27.2	26.833	25.1	25.867	23.667	24.467	24.667	24.9	25.133	23.767	26.267	24.367	26.333	28.167	25.967	26	24.133	25.233	23.8	22.767	24	25.3	23.767	23.433	25.3
2010	4	29.233	29.4	29.7	28.8	29.1	29.2	28.967	28.467	28.333	27.5	28.733	28.767	27.367	28.333	27.5	27.3	25.8	26.867	26.967	28.3	26.833	28.167	26.8	27.467	27.067	25.933	26.833	24.5	25.333	25.167	25.333	25.6	24.067	26.767	24.667	26.8	28.833	26.167	26.367	24.567	25.8	24.233	23.067	24.467	25.833	24.167	23.733	25.767
2010	5	29.2	29.367	29.567	29	28.733	28.767	28.567	28.167	28.067	27.3	28.667	29.133	27.833	28.333	27.467	27.433	26.067	27	27	28.133	26.8	28.033	26.8	27.367	26.967	26.333	27.1	25.1	25.8	25.233	25.3	25.5	24.233	26.6	25.067	26.833	28.567	26.433	26.467	25	26	24.533	23.467	24.667	25.8	24.267	24.033	25.833
2010	6	30.6	31.7	31.7	30.133	29.633	29.733	29.6	29.1	29.133	28.167	29.967	30.367	28.8	29.033	28.233	27.867	26.467	27.8	27.833	29.133	27.433	27.833	26.1	28.367	27.833	26.467	27.533	25.8	26.7	26.333	26.333	26.467	24.7	27.233	24.7	26.7	28.067	26.833	26.7	25.967	27.233	25.633	24.367	25.767	27.1	25.2	24.6	26.5
2010	7	25.133	26.7	26.8	24.9	24.8	25.033	24.967	24.3	24.367	23.5	24.833	25.233	23.733	24.467	23.633	23.733	22.233	23.567	23.633	24.867	23.2	23.1	21.367	24.467	23.967	22.367	23.433	21.6	22.5	22.733	22.7	22.833	21.1	23.467	20.133	21.933	23.367	23.533	23.9	22.6	23.833	22.1	20.833	22.233	23.533	21.6	21	22.8
2010	8	23.467	24.567	24.6	23.433	23.267	23.4	23.267	22.767	22.767	21.867	22.967	23.8	22.4	23.067	22.167	22.333	20.933	22.1	22.067	23.133	21.433	21.167	19.6	23.133	22.667	21.167	22.133	20.333	21.133	21.333	21.3	21.267	19.533	21.567	18.367	19.967	21.467	21.7	21.633	21.3	22.433	20.867	19.667	20.933	22.033	20.2	19.5	21
2011	3	27.7	27.767	28	27.267	27.433	27.5	27.267	26.667	26.533	25.667	27.1	27.167	25.833	26.633	25.933	25.4	24	24.967	25.033	26.333	24.9	25.533	24.167	26.6	26.2	24.167	24.967	22.667	23.5	23.8	23.933	24.133	22.7	25.2	22.233	24.2	26.167	25.333	25.367	23.267	24.433	22.9	21.833	23.167	24.433	22.8	22.333	24.233
2011	4	29.267	29.467	29.767	28.5	28.433	28.533	28.333	28.2	28.067	27.333	28.733	28.4	27.1	27.733	26.933	27.067	25.633	26.6	26.7	28	26.667	27.433	26.133	27.367	26.967	25.7	26.533	24.3	25.133	25.4	25.6	25.8	24.4	27	24.167	26.167	28.167	25.767	26.2	24.9	26.033	24.5	23.433	24.733	26.033	24.433	24.1	26
2011	5	27.367	27.633	27.833	26.967	26.9	26.967	26.833	26.467	26.4	25.633	26.867	27.067	25.733	26.367	25.567	25.533	24.367	25.333	25.333	26.467	25.1	25.467	24.167	26.167	25.767	24.333	25.167	23.433	24.133	24.3	24.333	24.467	23.067	25.333	22.6	24.367	25.967	24.733	25.1	24.033	25.033	23.667	22.533	23.733	24.867	23.3	22.867	24.567
2011	6	28.167	29.333	29.467	27.8	27.567	27.7	27.6	27.167	27.267	26.367	27.8	28.1	26.5	27.167	26.133	25.867	24.4	25.767	25.867	27.233	25.7	26.267	24.633	26.867	26.3	24.467	25.433	23.567	24.467	24.8	24.867	25.1	23.5	26.067	23.267	25.3	26.733	25.367	25.067	24.567	25.733	23.933	22.733	24.167	25.533	23.767	23.333	25.333
2011	7	24.733	26.467	26.5	24.367	24.267	24.433	24.333	23.967	23.967	23.067	24.4	24.767	23.267	23.967	23.033	23.333	21.9	23.2	23.2	24.467	22.767	22.733	20.933	24.033	23.5	22.1	23.1	21.267	22.133	22.367	22.333	22.4	20.7	23.1	19.8	21.667	22.933	23.367	23.5	22.3	23.5	21.833	20.5	21.867	23.133	21.2	20.6	22.433
2011	8	24.1	25.2	25.167	24	23.933	24.033	23.833	23.467	23.333	22.367	23.533	24.433	22.933	23.6	22.767	22.867	21.6	22.667	22.6	23.667	21.933	21.567	19.9	23.733	23.233	21.833	22.767	20.967	21.733	21.867	21.8	21.767	19.933	22.033	18.667	20.2	21.8	24.067	24.1	21.833	22.967	21.5	20.2	21.467	22.633	20.7	19.933	21.4
2012	3	28.667	28.767	29.067	28.3	28.433	28.467	28.233	27.667	27.5	26.7	28.067	28.3	26.967	27.533	26.933	26.3	24.933	25.867	25.967	27.167	25.867	27.133	25.867	27.2	26.8	25.1	25.867	23.633	24.4	24.667	24.767	25.033	23.633	26.167	23.933	25.9	27.833	25.967	25.9	24.333	25.3	23.8	22.7	23.967	25.167	23.667	23.333	25.233
2012	4	29.767	29.867	30.133	29.167	29.133	29.233	29.2	28.733	28.567	27.733	29.167	29.067	27.733	28.433	27.6	27.633	26.133	27.133	27.2	28.5	27.067	29.067	27.733	28.2	27.667	26.067	27.2	24.767	25.633	25.9	26.067	26.267	24.733	27.333	25.6	27.633	29.8	26.967	27.2	25.433	26.6	25	23.867	25.233	26.533	24.867	24.433	26.367
2012	5	29.5	29.7	29.9	29.367	29.167	29.167	29.2	28.667	28.467	27.667	28.8	29.433	28.233	28.8	27.833	28.267	26.867	27.633	27.567	28.567	27.167	28.933	27.733	28.967	28.233	26.8	28	25.867	26.5	26.6	26.567	26.6	25.167	27.3	26	27.7	29.533	28.067	28.067	26.767	27.667	26.167	24.967	26.033	27.067	25.4	24.967	26.533
2012	6	29.3	30.433	30.467	29.167	29.067	29.167	29	28.533	28.467	27.5	28.8	29.567	28	28.667	27.733	27.4	25.933	27.133	27.167	28.467	26.833	28.367	26.667	28.667	28.133	26.133	27.1	25.267	26.1	26.3	26.267	26.4	24.767	28.7	25.433	27.2	28.6	27.6	27.3	26.3	27.367	25.7	24.467	25.733	26.967	25.133	24.633	27.933
2012	7	26.633	28.233	28.267	26.233	26.2	26.333	26.233	25.867	25.867	25	26.267	26.1	25.2	25.9	25	25.3	23.833	25.1	25.1	26.3	24.667	24.567	22.567	26	25.433	24.1	25.033	23.267	24.033	24.233	24.2	24.267	22.567	24.867	21.633	23.167	24.5	25.1	25.4	24.333	25.433	23.7	22.467	23.733	24.967	23.033	22.467	24.167
2012	8	25.067	26.033	26.033	24.833	24.733	24.833	24.9	24.433	24.367	23.433	24.567	25.233	23.8	24.733	23.833	24.067	22.633	23.7	23.633	24.7	23	23.533	21.933	24.767	24.233	22.967	23.9	22	22.767	22.967	22.833	22.833	21.1	23.133	20.7	22.3	23.8	24.033	24.233	23.1	24.2	22.6	21.367	22.567	23.667	21.767	21.1	22.567
2013	3	30.033	30.1	31.2	29.5	29.567	29.633	29.433	28.933	28.833	28.067	29.433	29.433	28.067	28.767	28.067	27.567	26.167	27.2	27.267	28.633	27.267	29	27.733	28.433	28	26.267	27.133	24.8	25.667	25.967	26.2	26.433	25	28.5	25.667	27.667	29.5	27.167	27.167	25.467	26.567	25.067	23.967	25.267	26.567	25.033	24.667	27.4
2013	4	30.533	30.767	31.933	30.1	30.1	30.167	29.967	29.533	29.4	28.6	30	30	28.7	29.367	28.6	28.367	26.933	27.967	28.033	29.3	27.9	29.5	28.133	29	28.633	27.033	27.933	25.633	26.467	26.733	26.933	27.133	25.667	29.067	26.167	28.133	30.033	27.8	27.967	26.233	27.367	25.867	24.733	26.067	27.367	25.733	25.333	28.067
2013	5	30.833	31	31.2	30.433	30.267	30.367	30.167	29.7	29.633	28.733	30.167	30.5	29.1	29.833	28.9	28.933	27.433	28.467	28.467	29.633	28.1	29.667	28.367	29.6	29.2	27.7	28.6	26.4	27.167	27.367	27.4	27.5	25.9	29.4	26.433	28.367	30.3	28.6	28.733	27.233	28.333	26.767	25.533	26.767	27.967	26.167	25.667	28.5
2013	6	31.167	32.3	32.467	29.633	29.567	30.9	30.8	30.4	30.2	29.267	30.667	29.933	28.333	29.1	28.233	29.067	27.633	29	28.867	30.2	28.533	28.7	27	29	28.467	26.533	27.6	26.733	27.7	28	27.8	28	26.233	28.833	25.433	27.733	29.367	27.933	27.733	26.7	27.9	26.2	26	27.467	28.5	26.6	26.033	27.967
2013	7	28.633	30.2	30.233	27.067	27	28.367	28.233	27.8	27.833	26.867	28.233	27.467	25.9	26.667	25.733	27.233	25.7	26.967	27	28.267	26.5	26.333	24.6	26.667	26.167	25.033	26.1	24.067	25.833	26.067	26.033	26.1	24.233	26.733	23.2	24.767	26.7	26	26.4	25.2	26.4	24.633	24.167	25.567	26.867	24.833	24.167	26
2013	8	26.3	27.333	27.233	26.167	26.1	26.233	26.067	25.633	25.533	24.567	25.767	26.5	25.033	25.767	24.9	25.167	23.7	24.833	24.8	25.867	24.167	24.1	22.567	25.733	25.3	23.967	25	22.933	23.8	23.967	23.933	23.9	22.1	24.467	21.133	22.9	23.867	24.933	25.233	23.933	25.133	23.467	22.233	23.533	24.733	22.8	22.067	23.833
2014	3	28.833	28.9	30.233	28.533	28.533	28.533	28.3	27.767	27.633	26.833	28.233	28.6	27.267	27.733	27	26.5	25.067	26.033	26.133	27.7	26.333	28.267	26.633	27.767	27.3	25.533	26.367	24.033	24.833	25.067	25.233	25.467	24.067	27.8	24.967	26.667	28.867	26.467	26.5	24.733	25.767	24.267	23.133	24.4	25.633	24.1	23.733	26.8
2014	4	29.433	29.633	29.867	28.733	28.767	28.833	28.767	28.333	28.267	27.467	28.933	28.467	27.433	28.133	27.433	27.267	25.9	26.867	26.933	28.167	26.833	28.767	27.467	27.567	26.967	25.933	26.8	24.767	25.533	25.567	25.7	25.867	24.5	26.867	25.733	27.6	29.033	26.467	26.567	25.133	26.2	24.733	23.7	24.933	26.133	24.533	24.167	26.033
2014	5	28.4	28.567	28.7	28.333	28.033	28.033	27.3	26.767	26.6	25.8	27.667	28.133	27.267	27.3	26.3	26.233	24.8	25.6	25.567	26.6	25.133	27.267	26.033	26.867	26.367	25.333	25.967	24	24.567	24.1	24	24.1	22.633	24.767	24.4	26.1	28.067	25.967	25.867	24.533	25.367	23.733	22.5	23.533	24.533	22.9	22.433	24.033
2014	6	29.2	30.3	31.9	28.967	28.933	29	28.8	28.333	28.3	27.333	28.633	28.433	26.867	28.467	27.567	27.233	25.8	26.967	27.033	27.433	25.867	27.267	26.2	27.667	27.1	25.167	26.1	24.333	25.1	25.267	25.233	25.367	23.7	27.433	24.167	26.533	28.367	26.6	26.333	25.333	26.433	24.767	23.5	24.767	25.967	24.133	23.567	26.667
2014	7	27.033	28.7	28.733	26.533	26.533	26.7	27.167	26.767	26.767	25.8	26.667	26.167	25.433	26.733	25.867	26.2	24.7	25.933	25.933	27.2	25.4	25.633	23.767	26	25.267	24.9	25.933	23.967	24.867	24.267	24.233	24.333	22.467	24.867	22.267	23.867	25.567	25.1	25.433	24.233	25.433	23.667	22.333	23.767	25.033	23.067	22.4	24.2
2014	8	25.367	26.433	26.467	25.3	25.2	25.3	25.133	24.7	24.633	23.667	24.833	25.7	24.233	24.967	24.067	24.3	22.833	23.9	23.867	24.933	23.233	22.967	21.3	24.967	24.533	23.167	24.1	22.133	22.933	23.1	23	23.033	21.233	23.333	20.033	21.9	23.433	24.233	24.433	23.167	24.367	22.7	21.433	22.733	23.867	21.9	21.233	22.733
2015	3	26.152	26.332	26.071	23.755	24.142	23.639	23.768	24.381	26.697	27.116	26.2	30.09	28.584	29.826	26.052	25.119	27.565	26.819	26.806	27.09	26.716	26.81	26.506	27.31	28.539	25.506	27.458	25.352	26.632	26.539	26.552	26.581	26.213	26.745	26.003	27.813	32.197	24.032	26.965	24.352	26.884	24.203	22.581	26.39	26.671	26.277	26.148	26.958
2015	4	28.243	28.377	28.33	25.693	25.257	25.343	25.407	25.72	25.753	26.44	28.063	31.127	29.08	30.663	26.937	26.163	27.52	26.453	26.333	25.007	26.487	26.477	27.45	29.353	29.077	26.93	28.867	28.757	27.767	27.447	27.313	26.617	26.56	26.537	25.873	27.617	31.163	27.013	28.373	25.81	28.307	25.73	23.73	26.66	26.643	26.587	26.543	26.513
2015	5	29.168	29.316	29.423	26.755	25.984	25.642	25.648	26.042	28.852	28.581	29.071	30.606	29.413	30.655	27.368	26.929	28.397	28.287	28.232	29.155	27.91	28.19	27.077	27.871	29.487	26.19	28.284	26.077	27.416	27.484	27.484	27.542	26.213	28.129	25.716	27.568	30.352	24.374	27.852	25.219	27.7	24.781	23.261	27.119	28.061	26.571	26.103	27.245
2015	6	27.723	28.71	28.673	30.8	30.9	32.933	32.527	31.453	31.187	28.777	28.387	29.843	26.69	29.24	28.647	29.493	25.6	28.75	28.943	32.497	28.72	33.367	28.607	27.23	26.833	23.867	26.967	22.313	24.96	25.973	26.247	26.017	18.987	34.33	16.413	28.8	32.743	23.69	26.063	22.187	26.19	22.123	19.17	23.877	27.683	22.283	17.997	29.527
2015	7	28.6	30.032	30.1	26.213	24.91	24.619	24.584	25.1	28.394	30.997	33.865	30.419	28.981	30.435	26.845	26.455	28.165	28.174	31.119	33.91	30.494	35.719	28.839	28.074	29.219	25.935	28.303	25.423	27.077	27.3	27.358	28.606	22.381	32.074	20.055	29.858	33.545	24.932	28.1	25.468	27.781	24.619	22.594	26.926	30.865	23.845	21.845	29.106
2015	8	24.442	25.69	25.561	16.968	17.042	16.481	16.639	17.706	24.665	25.865	25.639	27.148	25.319	26.671	21.371	20.49	25.265	22.845	26.306	26.252	26.11	32.697	26.613	24.494	25.558	22.771	25.003	22.648	24.116	24.542	24.342	25.758	23.274	26.897	19.119	27.529	28.013	21.945	24.284	21.242	24.516	21.555	20.903	25.39	26.755	23.994	23.139	25.839
2016	3	28.135	28.558	28.284	32.061	29.823	28.577	28.287	28.284	28.239	34.21	28.445	31.19	29.584	30.948	28.694	30.432	28.526	31.455	34.026	38.41	33.068	35.51	30.11	28.397	29.461	26.652	28.613	26.381	27.968	28.748	29.003	30.319	23.516	34.335	21.771	30.526	34.513	24.897	27.655	25.045	27.861	25.142	24.665	27.41	32.6	24.919	22.787	30.761
2016	4	28.383	28.807	28.747	31.087	32.447	30.513	30.467	29.91	30.89	30.43	31.75	29.657	27.993	29.55	28.503	29.477	27.367	32.143	32.947	39.177	31.647	34.933	26.887	27.077	27.16	25.253	27.433	23.373	25.267	27.123	27.613	28.327	20.127	33.547	17.853	28.79	34.02	24.093	26.39	23.707	26.783	24.167	22.15	24.743	31.057	22.07	19.243	29.297
2016	5	28.494	29.113	29.055	25.506	25.048	28.697	28.497	28.277	30.323	29.3	31.148	29.339	28.19	29.265	28.145	29.471	28.848	33.152	33.413	38.087	32.281	34.8	27.458	27.152	28.277	26.613	27.945	24.968	26.545	28.735	29.11	29.694	22.661	33.658	20.765	29.684	32.768	24.448	26.161	25.845	27.59	25.581	24.523	26.274	32.171	24.203	21.945	28.323
2016	6	31.653	32.473	32.743	31.52	31.41	31.357	30.917	30.533	30.43	30.03	31.217	31.447	30.223	31.173	30.487	30.227	28.48	29.67	29.723	31.263	29.533	29.867	28.163	30.05	30.623	29.073	30.217	27.347	28.497	28.737	28.827	28.983	26.793	30.45	26.037	29.043	32.72	28.12	29.59	28.073	29.667	27.903	26.16	28.287	30.17	27.43	26.6	29.343
2016	7	26.929	28.065	28.306	28.365	24.077	24.129	23.977	23.877	26.555	25.477	27.51	27.387	25.977	27.5	25.445	24.126	23.671	24.223	24.223	24.984	23.913	23.784	23.239	24.952	25.848	23.516	25.606	21.348	23.21	23.674	23.706	23.752	22.626	24.126	22.026	22.839	27.358	23.258	25.129	21.177	24.587	21.09	19.71	23.445	24.258	23.023	22.6	23.703
2016	8	25.284	26.339	26.361	26.858	26.868	27.139	25.323	25.135	25.084	24.842	25.235	27.152	25.297	26.326	25.4	26.119	24.345	25.81	25.842	27.319	25.294	26.742	23.742	25.761	26	24.423	25.713	23.016	24.187	24.677	24.723	24.816	22.687	25.984	21.313	24.132	27.674	24.329	25.445	22.755	25.035	22.681	22.461	24.158	25.706	23.345	22.274	24.903
[truncated: 183 more columns]

## Sheet: Precipitation
	Grid points	1	2	3	4	5	6	7	8	9	10	11	12	13	14	15	16	17	18	19	20	21	22	23	24	25	26	27	28	29	30	31	32	33	34	35	36	37	38	39	40	41	42	43	44	45	46	47	48
	Longitude	39.2062	39.2062	39.2062	39.2437	39.2437	39.2437	39.2437	39.2437	39.2437	39.2437	39.2437	39.2812	39.2812	39.2812	39.2812	39.2812	39.2812	39.2812	39.2812	39.2812	39.2812	39.2812	39.2812	39.3188	39.3188	39.3188	39.3188	39.3188	39.3188	39.3188	39.3188	39.3188	39.3188	39.3188	39.3188	39.3188	39.3188	39.3563	39.3563	39.3563	39.3563	39.3563	39.3563	39.3563	39.3563	39.3563	39.3563	39.3563
	Latitude	12.5813	12.6188	12.6562	12.3938	12.4313	12.4688	12.5062	12.5437	12.5813	12.6188	12.6562	12.3187	12.3562	12.3938	12.4313	12.4688	12.5062	12.5437	12.5813	12.6188	12.6562	12.7312	12.7688	12.3187	12.3562	12.3938	12.4313	12.4688	12.5062	12.5437	12.5813	12.6188	12.6562	12.6937	12.7312	12.7688	12.8063	12.3187	12.3562	12.3938	12.4313	12.4688	12.5062	12.5437	12.5813	12.6188	12.6562	12.6937
Years	Months
1983	3	0	0	0	10	8	9	9	11	0	0	0	9	10	10	12	13	13	13	11	0	0	0	0	0	10	10	9	13	13	13	13	0	0	0	0	0	0	5	10	11	9	9	10	12	12	12	0	0
1983	4	13	23	20	19	16	22	21	18	32	24	19	32	21	19	16	16	20	31	30	25	19	18	2	35	40	19	17	16	20	32	28	24	19	18	17	2	2	44	41	18	17	17	27	31	27	24	22	18
1983	5	34	40	33	28	26	27	21	24	42	42	36	40	20	27	31	32	23	44	43	44	37	34	22	31	30	28	33	32	23	43	43	45	41	35	35	30	24	36	30	24	33	24	48	49	50	51	45	37
1983	6	2	1	2	4	3	3	3	2	2	1	2	4	3	4	3	3	3	2	2	0	2	2	2	4	4	4	3	3	3	2	1	1	2	2	2	2	2	4	4	4	3	3	1	1	1	0	3	4
1983	7	67	74	81	34	26	28	41	62	70	78	80	42	39	33	35	37	47	56	68	78	80	87	92	43	37	32	34	37	47	60	61	71	80	84	88	92	98	40	38	36	32	35	45	57	60	71	80	82
1983	8	85	87	89	61	66	66	72	76	86	85	86	122	93	60	63	64	64	75	103	101	84	59	49	108	99	59	53	55	56	96	107	111	97	58	58	48	47	108	103	54	52	51	61	102	99	103	93	55
1984	3	0	0	0	8	7	0	0	0	0	0	0	8	9	8	0	0	0	0	0	0	0	0	0	9	8	0	0	0	0	0	0	0	0	0	0	0	0	0	0	0	0	0	0	0	0	0	0	0
1984	4	0	0	0	0	0	0	0	0	0	0	0	0	0	0	0	0	0	0	0	0	0	0	0	0	0	0	0	0	0	0	0	0	0	0	0	0	0	0	0	0	0	0	0	0	0	0	0	0
1984	5	54	54	53	78	66	66	62	65	60	59	61	80	77	79	70	68	68	62	64	61	61	51	12	80	82	85	84	78	68	72	65	61	61	55	52	13	4	84	86	88	85	82	78	74	70	61	64	57
1984	6	2	3	3	6	6	6	5	4	2	3	3	6	6	6	6	5	4	2	2	2	3	3	6	6	6	5	5	4	2	2	2	2	2	3	3	6	14	6	5	4	4	2	2	2	2	2	2	3
1984	7	30	38	42	29	24	29	28	20	26	27	25	35	32	29	15	19	19	19	16	18	17	32	43	37	35	15	17	18	19	18	19	18	20	23	23	33	75	34	17	16	17	18	24	20	20	15	20	23
1984	8	3	3	3	11	10	4	3	3	3	3	3	11	10	10	4	4	3	3	3	3	3	4	4	10	10	4	4	3	3	3	3	3	3	3	4	4	46	9	4	4	4	3	3	3	3	3	3	3
1985	3	6	6	5	18	19	18	18	6	6	6	6	17	17	17	19	18	6	6	6	6	6	0	0	16	16	16	18	6	6	6	6	6	6	6	0	0	0	15	15	16	18	7	7	7	7	7	6	6
1985	4	35	33	32	39	41	39	37	37	37	36	35	40	40	40	46	54	55	56	56	54	54	42	34	42	42	58	58	56	57	57	58	59	56	55	51	35	33	61	63	66	64	59	60	60	62	61	59	57
1985	5	40	37	37	48	49	41	41	41	41	39	37	49	48	49	48	42	42	41	40	40	43	42	26	48	49	47	43	42	43	42	41	41	43	43	43	27	27	46	47	47	47	45	49	48	42	44	45	41
1985	6	0	0	0	0	0	0	0	0	0	0	0	0	0	0	0	0	0	0	0	0	0	0	0	0	0	0	0	0	0	0	0	0	0	0	0	0	8	0	0	0	0	0	0	0	0	0	0	0
1985	7	85	86	80	85	86	86	87	82	80	80	79	80	83	87	87	85	82	78	78	77	79	75	81	76	80	81	76	82	78	75	74	74	69	72	75	81	77	78	81	79	73	74	72	70	67	67	68	69
1985	8	111	108	105	140	138	118	111	109	104	106	97	143	133	138	121	113	110	109	105	103	95	95	93	134	134	116	113	110	111	109	109	100	98	97	94	93	74	127	117	115	114	113	112	112	104	100	97	95
1986	3	10	10	10	15	15	12	11	11	12	12	11	15	15	15	16	15	12	12	12	12	12	8	8	17	18	15	17	12	13	13	13	13	13	12	11	8	8	14	15	15	19	13	13	14	14	14	13	13
1986	4	76	69	67	85	85	81	81	82	74	71	68	82	87	88	84	82	83	76	77	72	71	57	50	85	88	90	82	84	75	77	75	75	73	67	58	52	38	92	93	91	90	77	78	82	82	78	75	69
1986	5	28	27	23	50	49	44	42	28	26	25	23	53	52	49	45	44	28	28	26	25	23	23	23	54	50	51	49	28	28	28	31	23	22	24	23	23	22	56	47	49	49	34	34	33	24	24	22	24
1986	6	76	77	70	92	88	80	75	70	67	69	67	96	91	88	75	72	70	66	68	68	61	62	62	86	85	69	69	67	68	65	65	59	56	59	61	61	62	73	66	64	66	64	62	60	56	49	55	57
1986	7	142	143	138	126	125	125	129	126	135	135	133	132	125	125	120	119	123	127	133	131	128	137	142	125	122	115	121	123	121	124	124	126	129	132	135	143	144	119	111	114	118	125	128	127	124	126	128	132
1986	8	270	268	266	245	256	261	263	272	275	262	268	248	249	247	258	262	268	276	270	265	267	274	244	250	249	244	254	256	262	270	262	260	265	265	272	241	244	251	253	248	256	257	263	261	255	261	263	269
1987	3	84	81	77	96	93	87	86	92	92	93	89	91	92	97	86	87	94	99	95	96	91	84	85	93	95	90	96	102	103	108	101	101	97	97	89	87	61	96	93	94	95	106	110	112	103	102	101	98
1987	4	9	9	10	9	9	8	9	9	9	9	10	9	9	9	22	21	23	23	23	24	24	16	11	10	9	28	26	26	27	26	27	27	26	26	30	13	9	24	27	29	32	29	28	30	30	29	28	27
1987	5	82	80	76	106	103	88	86	83	83	80	80	106	103	106	94	90	89	85	85	79	80	64	55	106	107	100	91	90	92	88	89	83	83	75	65	59	42	109	99	102	98	93	90	90	88	85	84	78
1987	6	0	0	0	0	0	0	0	0	0	0	0	0	0	0	0	0	0	0	0	0	0	0	0	0	0	0	0	0	0	0	0	0	0	0	0	0	0	0	0	0	0	0	0	0	0	0	0	0
1987	7	0	0	0	0	0	0	0	0	0	0	0	0	0	0	0	0	0	0	0	0	0	0	0	0	0	0	0	0	1	0	0	0	0	0	0	0	0	2	0	0	0	0	0	0	0	0	0	0
1987	8	127	127	128	154	150	135	133	135	129	129	130	149	148	143	133	130	136	132	129	129	128	120	113	149	149	132	127	125	128	129	129	127	125	121	120	116	112	139	128	130	126	127	128	123	125	121	121	122
1988	3	2	2	2	1	2	2	2	2	2	2	2	1	1	2	2	2	2	2	2	2	2	0	0	1	2	2	2	2	2	2	2	2	2	2	0	0	0	2	2	2	2	2	2	2	2	2	2	2
1988	4	41	41	41	39	38	43	46	47	44	43	42	39	40	40	46	48	48	48	49	45	44	43	41	41	41	49	48	50	49	52	49	47	45	44	44	42	22	40	48	51	50	53	53	53	53	50	47	47
1988	5	0	0	0	14	6	0	0	0	0	0	0	15	14	14	0	0	0	0	0	0	0	0	0	14	13	0	0	0	0	0	0	0	0	0	0	0	0	14	0	0	0	0	0	0	0	0	0	0
1988	6	0	0	0	0	0	0	0	0	0	0	0	0	0	0	0	0	0	0	0	0	0	0	0	0	0	0	0	0	0	0	0	0	0	0	0	0	3	0	0	0	0	0	0	0	0	0	0	0
1988	7	257	263	262	260	258	243	241	258	249	255	254	267	262	255	242	240	240	251	248	253	252	259	265	259	253	236	232	238	241	240	248	246	252	257	258	263	264	242	240	235	229	234	239	234	243	243	252	253
1988	8	281	284	283	264	263	265	258	271	271	280	278	260	262	257	256	259	262	266	272	274	278	255	264	251	253	256	250	261	259	270	274	273	276	255	262	267	267	242	245	248	250	258	256	269	273	276	268	256
1989	3	64	65	66	72	70	66	66	65	65	65	65	77	72	67	68	69	67	56	68	68	67	65	67	72	67	69	68	69	70	71	73	72	70	69	67	65	71	75	70	67	69	72	76	77	78	75	73	69
1989	4	41	41	41	30	39	39	41	41	42	39	39	31	30	40	39	41	41	39	52	51	52	52	38	32	42	41	41	39	54	54	54	54	54	53	53	53	39	36	39	42	41	55	57	57	57	56	56	54
1989	5	11	11	11	9	10	10	11	11	11	11	12	7	7	10	11	11	11	11	12	12	12	12	5	7	17	18	18	12	12	12	12	12	12	12	12	5	5	15	17	18	19	20	20	20	20	20	13	12
1989	6	1	1	5	1	1	1	1	1	1	5	5	1	1	1	1	1	1	2	2	6	5	3	3	1	1	1	1	2	2	2	2	2	2	2	3	3	1	0	1	1	2	2	2	2	2	2	2	2
1989	7	99	99	99	102	101	102	100	96	91	92	90	109	108	104	100	102	94	94	94	91	91	91	81	112	112	103	99	99	98	95	95	95	92	90	92	76	75	113	111	106	95	96	99	93	96	94	94	90
1989	8	56	54	54	82	82	83	69	68	48	47	46	80	75	79	83	82	66	45	43	43	41	41	38	78	77	78	78	81	40	38	39	37	35	34	33	31	27	78	81	74	77	63	66	35	35	32	32	30
1990	4	14	10	8	30	22	22	15	11	12	9	9	29	28	30	25	25	18	15	12	9	9	6	6	26	28	26	24	25	18	15	14	8	8	7	6	6	6	26	28	26	24	24	19	16	14	8	8	7
1990	5	0	0	0	0	0	0	0	0	0	0	0	0	0	0	0	0	0	0	0	0	0	0	0	0	0	0	0	0	0	0	0	0	0	0	0	0	0	0	0	0	0	0	0	0	0	0	0	0
1990	6	7	7	6	0	8	8	7	6	6	6	0	0	0	0	0	0	0	0	6	6	0	0	0	0	0	0	0	0	0	0	0	0	0	0	0	0	0	0	0	0	0	0	0	0	0	0	0	0
1990	7	173	164	155	166	178	178	170	171	164	162	153	163	169	166	167	167	172	170	163	161	153	144	141	157	162	160	161	167	172	170	159	152	141	133	141	136	131	155	162	158	160	161	160	161	148	143	141	133
1990	8	21	24	24	24	19	19	18	20	20	19	19	16	19	20	19	19	21	18	18	17	17	10	9	17	16	18	16	16	17	14	13	12	12	8	8	7	7	14	10	14	15	15	10	9	10	10	10	6
1991	3	10	9	2	0	0	2	10	11	8	8	10	3	0	0	0	3	4	4	8	11	13	7	11	3	0	4	3	3	4	4	5	11	12	14	7	11	6	7	4	4	3	3	4	2	3	12	12	14
1991	4	0	0	0	0	0	0	0	0	0	0	0	0	0	0	0	0	0	0	0	0	0	0	0	0	0	0	0	0	0	0	0	0	0	0	0	0	0	0	0	0	0	0	0	0	0	0	0	0
1991	5	7	8	12	12	10	10	12	12	11	11	12	8	11	12	10	10	10	9	11	11	12	12	12	9	11	12	12	10	10	9	10	10	12	12	12	12	11	9	11	12	12	12	11	10	11	11	12	12
1991	6	38	42	39	28	36	36	35	38	42	38	34	14	14	28	30	30	28	32	42	38	34	36	34	11	17	21	21	25	27	29	32	33	33	32	36	32	37	12	17	21	21	21	19	25	24	28	31	32
1991	7	170	162	160	155	160	160	162	160	163	162	150	154	155	152	157	154	156	160	163	162	150	143	139	147	144	144	149	154	156	160	157	158	144	139	142	137	139	137	144	144	149	149	155	156	149	145	144	139
1991	8	42	43	42	33	33	33	36	36	34	33	34	32	30	28	29	29	27	29	30	28	31	26	27	25	27	24	22	24	20	23	24	21	23	19	21	24	22	24	21	21	20	20	20	20	21	20	23	18
1992	3	4	4	4	7	6	6	6	6	4	4	4	11	7	7	6	6	6	5	4	4	4	1	2	8	7	6	6	6	5	4	4	4	4	3	1	27	30	9	8	6	6	5	5	4	4	4	3	1
1992	4	36	35	34	31	34	36	37	36	36	37	36	28	29	34	36	38	39	41	40	39	39	37	35	29	32	36	39	41	43	43	42	42	40	40	39	36	34	28	33	39	40	44	46	47	45	46	43	41
1992	5	63	65	67	33	59	65	68	63	67	69	73	33	34	34	66	70	74	77	70	72	75	73	72	34	36	66	70	75	78	82	83	75	78	77	77	75	74	35	67	71	76	79	83	87	86	79	80	80
1992	6	0	0	0	0	0	0	0	0	0	0	0	0	0	0	0	0	0	0	0	0	0	0	0	0	0	0	0	0	0	0	0	0	0	0	0	0	0	0	0	0	0	1	1	1	0	0	0	0
1992	7	146	138	142	151	145	144	143	137	137	145	144	147	150	149	148	145	138	133	135	141	143	125	123	147	146	144	140	145	136	133	143	142	142	138	126	125	125	146	139	143	140	135	141	145	145	149	145	128
1992	8	251	247	249	256	250	253	252	247	251	248	241	247	252	253	256	256	260	257	253	247	237	237	230	251	253	260	265	266	266	263	258	253	236	225	231	224	220	255	257	265	272	275	279	273	262	252	232	218
1993	3	41	43	34	43	44	43	41	44	40	38	31	42	41	43	45	45	43	42	42	39	32	29	29	43	42	42	42	45	44	42	42	41	33	35	30	32	31	43	41	43	42	43	43	43	44	43	34	31
1993	4	140	123	122	158	144	145	146	146	142	136	121	155	155	157	147	148	150	149	146	139	122	109	103	153	156	158	151	153	154	153	150	140	130	123	111	109	104	157	158	161	161	159	157	158	152	142	136	124
1993	5	77	79	82	72	72	77	80	83	80	82	84	70	75	75	79	81	83	87	86	87	88	86	84	73	76	79	79	83	85	87	89	89	92	94	89	88	87	76	80	80	82	145	148	91	89	91	93	92
1993	6	0	0	0	0	0	0	0	0	0	0	0	0	0	0	0	0	0	0	0	0	0	3	5	0	0	0	0	0	0	0	0	0	0	4	3	5	5	0	0	0	0	2	2	1	0	0	0	4
1993	7	90	87	78	108	101	96	103	102	87	83	77	134	117	100	106	99	97	88	86	83	72	51	54	111	105	99	101	96	97	87	85	81	74	58	50	50	51	106	99	99	101	99	97	94	82	79	72	54
1993	8	66	65	67	68	68	68	69	68	65	64	66	64	66	70	68	68	66	67	62	64	64	53	52	60	66	66	66	66	65	65	64	62	60	56	51	50	49	59	63	65	67	77	77	77	64	62	61	50
1994	3	4	7	6	5	16	16	16	16	14	4	8	6	17	16	17	17	17	19	14	13	8	14	14	18	18	19	19	18	18	21	16	17	8	9	14	14	12	21	20	21	20	24	25	18	18	16	11	9
1994	4	25	25	36	24	24	24	24	25	24	23	37	23	24	23	23	24	24	25	24	25	25	42	44	27	24	23	24	24	24	23	25	25	24	41	45	47	46	28	25	24	24	26	25	25	25	23	25	44
1994	5	9	9	8	8	19	20	20	9	9	9	8	7	8	11	11	11	20	21	10	9	9	8	7	16	20	20	12	13	22	22	22	9	9	8	8	8	8	17	20	22	14	15	24	24	15	10	9	9
1994	6	4	4	7	4	4	4	4	4	4	5	7	4	4	4	4	4	4	4	4	4	3	13	11	4	4	4	5	5	5	4	4	4	3	9	11	12	13	4	4	5	5	7	7	7	6	4	3	7
1994	7	228	230	221	249	228	228	227	224	228	220	218	266	254	241	233	229	220	217	221	217	213	208	203	262	242	222	210	213	203	199	216	213	206	210	209	197	186	246	220	214	210	197	199	199	200	206	204	208
1994	8	317	317	315	310	306	308	303	307	306	319	314	302	298	303	303	305	301	302	304	300	311	307	298	297	301	303	308	308	304	301	301	302	309	294	299	297	296	296	298	305	306	304	305	305	298	300	288	301
1995	3	23	22	23	18	21	21	21	22	23	25	26	17	19	21	23	23	22	23	24	25	29	29	29	24	25	25	26	25	24	25	23	27	30	28	29	29	30	29	27	26	27	29	27	26	26	28	30	29
1995	4	89	94	94	74	80	82	84	84	88	93	95	71	71	81	80	85	89	90	92	94	97	77	81	79	75	87	86	84	89	90	91	94	96	85	83	87	85	84	80	91	87	89	90	92	96	89	96	87
1995	5	54	57	56	50	57	55	56	56	56	57	54	48	49	47	56	58	58	58	60	61	54	49	49	47	44	55	58	58	59	59	59	63	56	54	51	52	49	45	52	58	58	62	65	64	63	60	56	55
1995	6	15	16	14	3	13	14	15	15	15	15	16	3	3	4	15	16	17	18	16	17	16	14	15	4	4	14	19	17	18	20	17	17	16	17	15	15	14	4	5	16	20	21	22	22	21	21	17	18
1995	7	207	207	208	221	202	202	200	204	204	207	203	221	220	199	197	198	203	203	207	208	204	205	203	218	204	193	199	202	206	204	207	208	209	206	205	207	205	204	203	194	201	202	202	207	208	206	210	208
1995	8	252	246	245	230	242	240	248	247	244	246	241	220	224	237	243	247	247	250	245	241	235	217	211	219	225	242	246	256	257	256	249	245	234	231	219	210	209	220	229	245	251	258	264	261	252	249	234	228
1996	3	86	88	90	76	81	80	82	82	87	84	78	76	77	79	80	80	83	83	84	83	82	91	90	79	76	79	83	80	84	84	86	92	83	94	94	93	96	78	75	83	84	86	86	89	88	92	85	95
1996	4	85	82	81	72	85	88	97	90	91	87	89	59	71	83	91	98	101	100	96	89	92	79	72	64	85	96	101	101	105	103	101	96	89	86	73	76	68	77	90	101	104	107	108	106	104	99	92	89
1996	5	122	124	121	78	109	126	126	127	129	128	125	74	83	105	126	133	138	136	135	135	133	125	118	76	99	131	138	137	140	139	143	138	134	130	128	123	115	102	106	137	142	138	141	143	147	142	138	136
1996	6	64	58	58	67	66	65	64	61	64	60	57	62	61	65	56	53	56	52	56	56	50	53	52	60	58	49	49	53	56	51	54	55	47	51	54	55	57	39	55	49	50	53	53	52	51	55	46	54
1996	7	147	142	133	179	155	150	137	135	131	138	120	179	176	154	141	134	131	127	125	126	110	102	97	176	158	137	134	131	129	126	118	123	114	103	104	103	101	151	147	132	133	131	128	126	116	109	117	102
1996	8	240	225	216	225	239	233	240	236	229	215	207	229	225	232	230	227	229	221	221	223	189	176	179	225	227	231	224	221	224	224	224	223	189	178	179	176	172	220	224	224	231	222	226	229	229	224	190	183
1997	3	72	70	65	50	75	75	75	75	74	73	68	51	48	63	71	65	63	63	65	67	65	54	52	54	62	63	69	69	67	69	68	65	66	56	54	53	48	63	61	66	72	75	75	76	75	69	66	57
1997	4	37	38	38	30	36	37	36	35	38	38	37	26	29	33	39	36	35	35	36	39	31	34	34	28	33	37	36	38	39	37	39	39	31	33	34	34	34	30	34	39	38	39	38	40	39	39	31	35
1997	5	33	31	31	38	41	41	39	38	36	33	27	35	38	40	41	43	43	41	38	35	29	30	28	38	40	44	45	46	47	45	41	39	30	27	31	31	28	40	42	46	48	49	48	47	45	38	30	29
1997	6	47	49	47	50	44	45	45	44	46	46	46	53	53	48	43	45	47	47	47	48	45	41	38	53	46	44	47	45	48	47	48	48	45	42	42	38	38	52	49	45	48	46	45	47	49	51	46	42
1997	7	158	140	137	175	166	165	142	135	136	138	136	172	169	162	155	142	134	136	136	139	130	136	130	160	157	143	141	142	141	140	140	138	136	136	136	132	131	148	150	143	142	142	145	145	142	140	136	137
1997	8	72	73	73	89	72	63	68	63	62	65	65	93	89	74	63	60	56	58	61	58	63	67	66	84	75	67	59	54	51	50	56	59	59	64	63	67	66	73	70	59	50	52	49	51	53	56	58	63
1998	3	17	17	16	11	13	20	18	19	18	18	18	11	11	13	20	22	19	19	18	19	19	18	16	11	13	15	21	22	20	19	18	20	19	20	19	19	16	13	13	21	21	21	20	20	19	20	20	20
1998	4	17	18	18	6	20	18	19	19	17	18	19	7	9	18	20	23	24	20	19	19	21	21	20	7	15	23	23	24	23	25	21	19	20	22	22	22	21	15	20	23	23	23	24	24	22	21	21	23
1998	5	44	36	37	43	41	45	48	46	46	40	40	40	42	42	47	44	48	48	47	39	39	37	36	42	40	42	50	52	52	48	47	46	40	39	37	36	36	42	45	49	52	56	56	56	50	48	41	39
1998	6	14	15	15	3	3	4	7	12	12	14	13	3	2	3	4	4	10	11	12	13	14	17	16	2	2	4	9	5	9	10	11	14	15	15	18	19	21	2	2	4	9	10	10	10	12	12	15	15
1998	7	358	354	338	360	372	377	366	368	366	363	347	354	359	357	369	369	359	365	365	357	351	335	321	356	355	362	369	367	360	363	361	361	358	344	341	325	303	347	347	365	371	371	364	365	363	360	365	352
1998	8	308	295	292	283	293	299	299	300	296	294	291	267	276	297	302	310	309	308	303	305	301	282	282	268	292	305	311	317	334	324	316	307	299	283	278	273	278	285	304	307	316	321	329	321	317	301	279	273
1999	3	0	0	0	0	0	0	0	0	0	0	0	0	0	0	0	0	0	0	0	0	0	0	0	0	0	0	0	0	0	0	0	0	0	0	0	0	0	0	0	0	1	0	0	0	0	0	0	0
1999	4	5	5	5	22	22	25	24	24	6	6	7	24	21	22	26	26	26	26	25	6	7	6	6	25	21	24	27	29	28	28	26	6	7	7	8	8	6	22	28	26	31	31	31	30	30	7	7	8
1999	5	5	5	4	1	6	6	6	6	5	5	5	0	1	7	7	8	7	6	6	6	5	4	3	1	6	7	8	8	7	7	6	6	5	4	4	3	2	6	9	8	8	9	9	8	7	6	5	4
1999	6	17	16	9	15	18	19	19	18	17	15	9	8	14	16	19	20	19	18	18	15	9	9	8	10	14	19	21	21	20	20	19	18	9	9	9	8	8	13	18	21	23	29	27	21	20	17	10	9
1999	7	210	214	211	247	229	223	204	201	198	194	200	252	248	233	214	205	207	201	192	191	186	185	189	249	237	207	206	203	197	197	193	191	177	180	181	181	189	228	214	209	207	210	200	199	192	189	179	181
1999	8	260	241	235	284	282	289	279	282	255	236	225	285	281	290	294	289	288	282	265	237	222	207	205	294	307	308	301	299	296	286	273	237	221	207	202	198	203	309	304	308	312	309	302	289	273	252	216	206
2000	3	4	4	4	1	4	4	3	3	4	4	4	2	2	3	4	5	4	4	4	4	4	4	3	1	3	3	4	4	4	4	3	3	4	4	4	3	0	1	3	3	4	4	4	4	4	4	4	4
2000	4	32	27	26	32	34	35	33	33	32	30	27	31	32	34	37	35	35	32	38	34	29	24	21	36	35	36	34	37	41	36	37	32	30	25	24	21	20	39	43	38	37	37	40	39	41	36	30	25
2000	5	53	52	50	29	45	48	54	54	54	53	51	17	19	44	51	55	57	56	59	55	53	52	48	18	42	55	57	58	63	62	60	57	55	55	52	47	46	33	54	57	60	62	65	63	61	59	56	56
2000	6	0	0	0	2	2	2	0	0	0	0	0	0	0	2	2	2	2	0	0	0	0	6	7	0	0	2	2	2	2	0	0	0	0	2	6	8	7	0	0	2	2	2	3	2	0	0	0	2
2000	7	212	207	198	211	211	202	210	207	210	201	197	203	211	210	195	202	200	201	218	203	196	195	185	205	207	211	200	209	212	208	211	207	194	190	197	186	203	212	206	207	210	214	221	210	210	210	196	189
2000	8	279	279	273	257	287	291	298	287	285	275	267	251	261	303	297	307	304	293	288	275	267	248	231	254	308	311	308	311	308	306	297	278	265	250	245	232	227	304	317	311	314	310	309	310	289	276	261	247
2001	3	37	22	21	69	76	77	72	60	45	23	21	62	72	75	77	81	78	79	48	29	23	25	23	71	77	80	83	84	84	83	63	34	24	28	26	24	13	71	81	84	91	91	93	88	80	38	31	29
2001	4	6	2	2	20	16	16	13	10	6	2	2	21	21	19	15	14	14	11	10	2	2	2	3	21	19	18	16	12	14	14	9	2	2	2	3	3	3	17	17	15	15	16	16	16	12	5	2	3
2001	5	5	5	5	8	13	15	15	8	6	5	6	8	15	17	16	17	16	19	6	5	6	6	7	17	19	20	22	18	17	20	16	6	6	7	7	7	8	28	29	31	29	24	24	24	27	6	6	7
2001	6	32	26	26	29	28	27	28	28	29	27	23	28	28	27	28	29	34	34	34	28	25	31	24	26	29	29	29	35	36	35	33	33	25	32	33	25	31	25	30	29	36	37	37	36	35	32	27	30
2001	7	321	336	349	292	295	286	291	307	311	341	354	278	291	290	285	281	288	298	308	336	359	381	380	263	280	269	270	270	285	288	301	322	355	367	388	394	378	239	259	270	273	269	272	281	286	301	342	354
2001	8	312	295	291	304	303	306	307	315	311	296	289	288	297	309	297	301	312	312	306	296	278	259	244	287	302	297	307	311	317	315	311	302	278	261	256	241	250	291	301	298	313	319	330	324	310	301	279	260
2002	3	0	0	0	15	16	6	4	3	0	0	24	39	34	19	21	19	9	6	3	0	25	53	53	45	42	36	24	24	10	9	9	2	0	49	56	58	52	48	41	38	33	31	18	11	12	6	2	0
2002	4	3	0	0	11	26	28	25	12	10	0	0	35	35	34	52	52	49	31	11	0	0	0	0	39	56	65	59	62	55	47	38	0	0	0	0	0	0	63	67	71	77	76	66	57	48	21	0	0
2002	5	0	0	0	5	6	6	5	5	0	0	0	4	4	5	6	6	6	5	0	0	0	0	0	5	4	5	7	7	6	6	5	0	0	0	0	0	0	5	5	5	7	7	10	7	6	5	0	0
2002	6	5	7	9	0	6	8	7	7	7	7	12	0	0	5	7	7	7	7	7	5	13	19	22	0	5	5	6	7	7	7	8	8	14	21	21	25	19	0	5	5	6	6	6	7	7	7	9	16
2002	7	96	95	100	141	132	117	112	94	96	96	96	161	149	127	111	111	99	89	95	97	98	97	96	152	123	113	110	109	102	92	90	94	94	92	101	97	99	122	117	115	108	107	103	102	90	89	93	91
2002	8	196	176	170	215	200	198	188	188	185	173	163	206	211	213	198	208	186	190	197	172	165	142	128	207	209	203	208	210	212	208	201	180	168	154	146	133	128	208	213	205	208	207	209	205	199	194	171	155
2003	3	11	9	2	13	12	12	11	11	11	13	3	15	13	37	39	40	38	38	12	13	3	3	3	11	37	40	43	43	44	44	42	15	3	3	3	3	0	36	38	43	47	49	50	48	46	16	3	3
2003	4	35	22	22	31	33	41	40	33	31	22	23	26	25	33	42	46	47	47	32	23	23	36	36	23	39	38	49	51	54	53	49	32	24	40	40	40	29	34	38	42	52	53	57	54	52	35	25	41
2003	5	0	0	0	2	0	0	0	0	0	0	0	3	1	1	0	0	0	0	0	0	0	0	0	3	1	1	11	0	0	0	0	0	0	0	0	0	0	3	11	12	12	12	10	0	0	0	0	0
2003	6	15	11	7	13	15	15	20	20	18	11	7	14	14	10	20	20	22	21	17	10	10	9	9	14	10	11	10	21	21	20	17	14	17	8	9	10	11	20	11	10	11	15	25	20	21	21	16	8
2003	7	105	111	115	158	139	129	120	114	105	113	108	169	156	140	125	125	116	118	103	114	108	112	110	159	136	136	120	118	116	119	112	107	107	110	116	116	114	152	142	134	130	130	124	119	121	100	102	106
2003	8	258	242	228	276	277	263	264	263	257	246	227	280	275	279	270	271	279	272	253	243	223	206	203	280	267	272	271	270	280	279	262	243	224	205	201	200	199	271	267	279	292	293	285	280	268	245	223	205
2004	3	2	2	2	3	3	2	2	2	2	2	2	3	3	3	2	2	2	2	2	2	2	3	3	4	2	2	2	2	2	2	2	2	2	2	4	4	3	4	23	23	20	18	17	2	2	2	2	2
2004	4	22	9	9	12	16	24	26	25	22	18	9	13	15	15	22	30	29	25	23	20	7	7	7	20	26	30	31	30	30	28	24	23	11	7	7	6	6	25	30	31	34	31	29	29	29	24	19	8
2004	5	0	1	1	0	0	0	0	0	0	1	1	0	0	0	0	0	0	0	0	0	1	2	2	0	0	0	0	0	0	0	0	0	1	2	2	2	2	0	0	0	0	0	0	0	0	0	0	2
2004	6	21	19	20	26	25	23	25	19	21	20	20	26	25	28	25	23	21	19	20	21	20	19	18	26	26	27	26	25	24	19	17	19	19	18	18	18	19	27	27	27	28	28	26	22	17	17	17	19
2004	7	104	102	91	150	140	125	121	111	107	96	92	166	151	140	135	121	121	111	109	97	91	74	72	155	135	135	131	122	125	115	111	98	84	74	72	71	72	136	134	128	130	130	125	125	117	106	90	79
2004	8	168	154	144	172	171	186	177	173	164	148	136	186	172	176	182	196	194	176	166	149	129	88	84	179	199	188	198	193	202	183	173	149	128	96	76	70	81	189	198	194	203	201	206	203	184	164	135	104
2005	3	39	39	36	30	34	34	45	46	42	37	35	26	30	35	35	37	43	48	45	38	36	34	34	33	38	41	47	45	46	51	45	43	38	35	34	35	32	42	48	50	52	54	56	45	46	45	41	35
2005	4	42	43	40	29	29	42	47	47	46	43	44	12	37	36	45	47	49	48	46	43	45	49	45	22	48	50	57	55	48	48	46	46	45	49	51	47	43	45	59	62	59	61	57	47	46	44	45	48
2005	5	31	30	24	47	47	48	36	35	32	31	26	54	46	50	51	52	52	36	34	31	30	27	26	63	64	53	57	54	54	39	36	34	31	27	27	27	25	70	70	71	79	77	74	55	41	38	32	29
2005	6	20	23	25	7	8	7	15	17	18	20	24	11	8	7	16	18	14	14	18	20	25	38	37	7	8	15	19	16	18	18	15	20	24	28	40	40	36	2	8	16	19	18	17	15	13	13	22	25
2005	7	224	232	236	242	241	225	213	222	217	228	234	236	240	236	216	214	218	213	219	219	234	250	249	224	210	220	217	230	219	217	219	218	231	236	254	258	253	196	207	221	212	216	215	217	220	218	216	230
2005	8	195	200	204	211	217	229	226	204	209	196	200	200	220	231	223	229	228	200	211	191	196	235	237	212	240	236	241	234	234	203	205	192	198	211	239	242	225	218	237	243	244	246	236	232	204	208	189	198
2006	3	43	38	35	46	46	45	48	43	43	40	38	48	48	51	59	56	56	48	43	44	38	41	39	43	54	55	59	53	56	52	47	43	39	39	42	43	36	54	54	56	61	59	58	57	55	48	42	38
2006	4	41	36	20	17	33	39	48	43	40	36	22	13	27	30	45	48	52	52	43	38	22	22	22	29	31	33	50	53	54	53	49	39	33	15	23	25	15	29	32	46	55	55	58	58	56	48	37	27
2006	5	9	4	4	12	15	11	11	11	9	4	4	6	12	13	16	11	11	11	10	10	4	8	8	10	13	15	17	11	11	11	11	10	4	4	10	10	8	10	14	15	18	18	12	12	12	11	9	4
2006	6	14	13	19	0	2	2	7	7	11	13	18	0	0	0	0	1	6	7	8	13	18	27	27	0	0	0	0	0	0	6	7	11	16	20	27	27	20	0	0	0	0	0	0	0	6	11	16	18
2006	7	171	182	180	173	161	150	154	173	167	177	173	161	145	145	143	145	147	152	168	166	176	172	171	152	123	129	144	144	144	148	160	164	170	164	171	179	176	124	119	105	115	131	129	148	157	159	162	166
2006	8	352	358	357	326	331	349	347	346	351	357	361	291	310	325	332	342	344	348	350	358	356	377	375	294	310	321	324	328	341	342	344	350	356	367	380	387	375	287	296	309	312	316	335	339	342	348	355	361
2007	3	6	7	8	12	13	12	12	12	7	8	8	9	14	14	13	13	12	12	7	8	8	16	17	8	10	18	20	21	19	12	6	7	8	8	19	19	14	8	10	19	21	22	22	21	11	6	7	8
2007	4	28	30	30	58	60	61	49	30	39	38	37	59	58	62	66	50	50	48	40	38	37	28	22	60	62	66	66	52	56	48	50	38	37	37	28	27	22	70	70	68	64	53	53	48	52	38	38	37
2007	5	8	8	7	0	2	2	6	7	8	7	8	0	0	1	2	2	7	7	7	7	8	8	8	0	0	2	2	2	3	7	7	7	8	9	9	9	8	0	0	2	2	2	3	3	6	7	7	9
2007	6	32	33	33	38	38	36	31	29	32	32	33	36	37	35	33	28	29	28	31	32	35	42	44	32	34	24	27	28	30	28	27	31	35	42	45	49	44	35	31	24	26	27	30	31	29	27	32	37
2007	7	332	332	338	297	304	303	306	331	333	335	339	281	287	286	293	292	298	307	332	338	344	363	369	278	277	287	280	283	297	301	327	334	344	355	374	380	370	280	288	279	277	284	283	298	306	329	342	353
2007	8	290	287	279	284	291	294	296	295	290	284	276	266	273	284	298	302	304	300	294	286	277	259	242	270	279	298	297	302	304	302	298	289	280	272	261	242	235	275	280	295	300	312	307	312	302	294	282	272
2008	3	0	0	0	0	0	0	0	0	0	0	0	0	0	0	0	0	0	0	0	0	0	0	0	0	0	0	0	0	0	0	0	0	0	0	0	0	0	0	0	0	0	0	0	0	0	0	0	0
2008	4	6	5	6	15	15	12	11	11	11	5	6	17	15	15	11	12	11	11	11	5	6	7	7	15	15	11	11	11	12	12	12	6	6	7	7	7	7	13	10	11	11	11	11	13	12	11	6	6
2008	5	28	33	31	27	32	30	32	31	27	32	32	25	26	34	38	41	39	33	26	28	28	30	32	24	31	36	36	35	41	38	32	28	28	25	32	32	29	29	32	37	37	38	37	42	40	28	29	27
2008	6	26	16	16	28	31	29	27	29	27	16	15	29	29	27	25	29	28	29	30	26	17	24	25	26	26	26	26	28	29	27	29	26	17	16	24	23	21	25	23	25	27	28	28	31	31	28	24	17
2008	7	144	152	152	162	150	147	146	140	139	151	153	158	160	160	152	148	142	144	142	149	152	176	175	158	158	154	153	151	146	143	138	145	152	157	184	181	167	156	156	152	151	151	146	144	144	139	146	154
2008	8	137	141	138	149	134	140	141	138	137	132	129	167	156	148	142	136	139	141	134	126	121	123	128	167	161	141	141	144	138	134	132	121	120	117	118	116	124	166	163	156	153	146	142	132	128	125	116	116
2009	3	22	21	20	26	25	25	24	23	22	22	22	26	26	26	25	24	25	26	23	22	22	21	19	24	23	25	23	23	25	24	24	22	22	20	20	21	20	22	25	24	26	26	27	27	25	24	22	19
2009	4	9	0	0	13	14	15	14	11	10	0	0	15	14	24	24	23	15	14	10	9	0	0	0	18	24	26	26	25	23	21	12	9	0	0	0	0	0	17	24	28	27	27	25	24	20	11	8	0
2009	5	0	0	0	0	0	0	0	0	0	0	0	11	7	0	0	0	0	0	0	0	0	0	0	8	0	0	0	0	0	0	0	0	0	0	0	0	0	12	5	4	0	0	0	0	0	0	0	0
2009	6	0	0	0	0	0	0	0	0	0	0	0	0	0	0	0	0	0	0	0	0	0	1	1	0	0	0	0	0	0	0	0	0	0	0	1	1	0	0	0	0	0	0	0	0	0	0	0	0
2009	7	224	226	221	195	196	203	206	214	218	224	222	196	197	192	201	200	209	211	214	221	225	237	235	195	192	202	202	200	203	207	207	216	221	234	244	243	240	191	190	193	201	197	200	201	204	206	218	230
2009	8	211	211	209	184	185	189	200	205	204	212	206	150	178	179	186	191	203	201	204	203	203	202	204	157	175	176	187	188	202	193	197	197	200	201	200	204	204	156	175	178	181	183	196	198	196	198	192	196
2010	3	13	16	17	11	14	15	17	14	14	16	16	6	11	13	17	20	18	16	14	15	16	16	16	7	12	18	21	20	20	18	14	14	17	16	15	16	14	9	14	17	21	21	19	19	16	14	16	14
2010	4	47	48	51	36	34	47	46	48	55	51	50	38	35	37	46	49	51	49	48	52	51	54	56	37	40	48	45	47	50	50	48	54	51	52	58	56	50	37	34	45	40	55	60	65	51	50	50	53
2010	5	41	42	40	34	39	43	45	43	43	44	43	31	39	41	46	45	42	43	44	45	46	49	52	34	43	46	49	47	44	44	45	46	46	49	52	54	51	38	43	48	47	52	50	48	46	45	47	48
2010	6	2	2	2	0	0	0	0	2	2	2	2	0	0	0	0	0	0	3	2	2	2	13	16	0	0	0	0	0	0	2	2	2	2	11	14	17	14	0	0	0	0	0	0	0	2	2	2	2
2010	7	207	200	202	229	227	236	230	222	210	200	201	239	229	232	233	230	216	214	207	203	196	194	194	235	234	230	228	222	218	217	218	206	197	190	195	194	195	231	230	230	227	226	219	217	217	202	193	195
2010	8	322	303	317	348	350	348	332	322	313	313	316	357	357	352	354	341	334	329	317	310	313	330	327	357	355	351	345	345	334	328	320	309	299	313	332	331	326	350	350	344	345	344	335	324	316	309	301	291
2011	3	48	48	50	57	58	51	51	48	50	49	52	54	57	56	52	50	51	50	48	50	51	54	56	55	56	53	50	50	51	49	49	49	50	53	57	58	53	52	55	55	50	49	49	50	48	49	50	52
2011	4	5	4	5	14	5	5	4	2	2	6	5	20	13	5	6	6	6	3	2	5	6	8	9	17	12	9	7	6	6	5	2	5	6	7	9	9	9	14	11	10	7	7	5	5	3	2	6	6
2011	5	38	33	32	43	47	47	46	40	41	33	31	44	50	48	48	51	48	45	43	39	32	37	37	48	55	49	51	53	52	48	42	43	32	30	37	35	37	51	55	54	53	54	54	52	46	46	39	31
2011	6	2	3	3	0	0	0	0	0	0	3	3	0	0	0	0	0	0	0	0	3	3	27	30	0	0	0	0	0	0	0	0	0	3	11	30	34	32	0	0	0	0	0	0	0	0	0	0	4
2011	7	195	198	203	210	208	204	190	190	195	200	204	210	220	211	202	187	192	191	188	200	202	221	226	198	196	188	185	184	181	188	190	195	207	216	228	233	229	186	177	167	171	183	184	185	186	191	199	205
2011	8	204	196	210	203	192	189	182	185	185	195	204	189	184	176	172	167	169	170	194	192	206	225	224	166	173	171	164	161	168	169	169	180	202	219	229	235	225	162	167	161	163	162	160	162	164	166	186	206
2012	3	40	47	50	41	42	42	41	41	44	49	52	26	35	43	42	42	43	43	44	43	52	58	59	23	24	33	34	35	43	43	42	44	45	55	62	61	58	23	26	32	32	35	36	44	45	46	45	47
2012	4	35	36	36	42	46	48	44	42	35	36	37	40	44	38	40	42	40	34	35	36	39	45	45	40	38	40	40	43	43	41	25	36	39	43	46	48	43	44	38	40	43	44	45	45	39	22	35	41
2012	5	10	10	10	12	12	11	11	11	10	10	10	17	17	13	16	15	15	11	10	10	9	20	21	17	12	16	17	16	16	15	11	10	10	8	21	21	9	16	17	14	14	14	14	17	15	10	10	9
2012	6	21	27	26	16	16	17	19	22	20	22	26	15	16	16	17	17	17	20	21	20	26	28	27	16	16	18	18	18	17	21	21	21	25	26	25	25	27	16	18	18	19	19	19	17	23	22	19	25
2012	7	252	230	215	290	294	295	290	259	235	225	205	286	289	300	299	299	288	261	235	207	199	191	179	293	301	302	305	305	296	263	233	208	200	190	184	175	186	302	309	312	314	320	301	265	215	208	199	188
2012	8	166	141	140	232	209	191	182	171	166	140	139	222	228	222	219	186	179	174	163	140	139	134	134	211	216	220	221	191	179	176	169	163	138	134	131	122	122	218	218	217	216	196	190	182	174	167	138	135
2013	3	0	0	0	0	0	0	0	0	0	0	4	0	0	0	0	0	0	0	0	0	6	6	6	0	0	0	0	0	0	0	0	0	0	6	6	8	8	0	0	0	0	7	7	8	7	0	0	0
2013	4	10	7	8	0	0	0	0	0	7	7	9	0	0	0	0	0	0	0	6	7	9	41	43	0	0	0	0	0	0	0	0	6	9	20	46	48	42	0	0	0	0	0	0	0	0	0	6	9
2013	5	5	9	10	0	4	3	7	4	5	10	13	5	5	4	2	1	1	5	5	6	13	19	19	4	4	2	2	2	2	1	5	5	11	18	19	21	19	4	4	2	2	2	2	2	1	6	6	8
2013	6	23	33	40	9	10	15	16	17	20	33	41	6	7	9	10	10	8	12	14	25	39	56	60	2	2	3	3	2	2	8	13	18	37	54	60	64	60	2	2	0	0	0	0	2	2	13	20	36
2013	7	211	198	189	238	232	226	220	216	209	196	196	225	224	226	229	221	219	219	208	199	198	204	204	222	226	220	220	219	217	218	216	199	197	200	204	206	197	219	229	212	218	217	216	217	216	208	196	197
2013	8	200	196	188	196	209	203	213	208	204	194	184	197	197	207	204	200	204	208	200	192	180	170	169	198	197	203	195	209	201	203	199	190	178	171	169	167	169	191	195	191	190	205	202	201	193	193	185	173
2014	3	0	0	0	4	0	0	0	0	0	0	0	5	4	0	0	0	0	0	0	0	0	3	3	5	4	0	0	0	0	0	0	0	0	0	3	3	0	4	0	0	0	0	0	0	0	0	0	0
2014	4	8	7	7	11	10	11	10	10	9	7	8	13	13	13	12	14	11	10	8	12	8	8	10	19	18	19	18	15	12	12	10	8	8	8	9	10	9	22	22	19	18	17	15	13	12	9	12	8
2014	5	44	41	41	32	28	29	33	37	43	40	40	38	33	28	24	28	31	35	42	37	41	57	59	36	34	24	24	29	31	32	41	38	41	52	60	62	60	34	27	24	23	27	30	34	38	38	41	42
2014	6	3	3	4	0	0	0	0	3	3	3	3	0	0	0	0	0	0	0	3	2	3	4	4	0	0	0	0	0	0	0	0	2	3	3	4	4	4	0	0	0	0	0	0	0	0	2	3	3
2014	7	193	191	193	179	177	188	188	191	193	196	200	179	173	178	173	175	175	186	184	195	200	206	204	171	172	171	176	180	174	176	185	191	201	201	206	206	201	175	168	172	176	179	179	179	178	189	189	200
2014	8	222	224	227	211	213	212	215	219	224	224	225	207	209	213	215	216	198	201	204	228	225	218	199	200	202	200	201	201	201	200	208	209	206	225	224	223	226	203	204	204	202	201	201	200	207	211	207	205
2015	3	7	5	12	17	20	19	17	15	7	9	15	19	16	21	26	24	21	16	8	10	14	21	22	19	17	22	30	25	21	14	8	11	12	12	14	18	16	18	20	26	30	25	18	9	6	11	13	11
2015	4	0	0	0	0	0	0	0	0	0	0	0	0	0	0	0	0	0	0	0	0	0	0	0	0	0	0	2	2	0	2	1	0	0	0	0	0	0	0	2	5	5	2	0	2	1	0	0	0
2015	5	92	89	82	77	79	85	83	85	86	83	83	76	77	79	82	84	82	81	76	80	81	77	77	80	77	77	83	82	82	77	78	83	82	82	80	80	78	77	75	79	86	84	86	85	79	84	85	84
2015	6	29	26	40	20	23	31	38	33	24	32	53	16	19	21	26	30	32	27	21	32	52	63	63	19	22	23	27	30	28	23	25	34	46	59	62	63	58	20	24	33	46	49	40	28	22	29	41	48
2015	7	63	68	78	43	43	47	52	56	64	70	79	32	35	38	41	45	49	53	57	66	80	91	95	28	32	35	39	39	44	50	58	68	79	86	88	88	92	28	31	34	37	36	37	44	52	63	73	76
2015	8	152	161	149	155	150	144	139	135	147	149	146	149	144	138	137	131	125	118	128	132	137	137	135	144	139	130	124	116	110	108	107	120	130	130	129	126	131	141	128	113	115	108	104	104	97	111	119	120
2016	3	9	10	10	6	6	7	7	8	8	10	11	6	5	6	6	6	7	7	8	9	11	9	8	4	5	7	7	6	6	8	9	8	9	9	8	7	7	3	6	7	4	3	4	7	8	9	11	11
2016	4	41	43	51	33	41	48	47	46	50	50	61	35	39	40	48	49	48	51	47	47	58	66	66	41	50	49	52	51	52	55	39	38	52	60	65	65	64	46	52	47	43	42	37	32	29	34	42	53
2016	5	57	55	55	42	44	50	57	58	54	52	51	34	35	38	43	47	48	49	48	52	50	44	42	29	30	32	39	40	37	40	42	48	48	43	39	40	42	27	30	28	33	32	33	33	27	34	45	37
2016	6	38	41	40	36	37	34	29	30	35	41	37	31	26	31	35	27	22	24	30	34	30	31	33	29	26	27	34	30	20	19	24	26	24	23	23	28	31	24	25	23	30	27	21	20	21	21	23	19
2016	7	309	315	327	297	306	302	294	299	316	333	350	248	274	292	306	302	298	301	317	335	350	356	345	233	273	283	298	301	299	300	316	335	348	352	349	342	339	207	253	283	308	325	315	305	314	327	334	337
2016	8	253	258	259	242	253	264	269	266	259	264	271	215	223	242	247	260	269	265	261	268	275	259	253	207	217	234	246	257	263	268	272	280	277	271	258	251	251	199	210	243	278	287	283	279	282	284	275	267
[truncated: 183 more columns]
